# Supplementary material for: Silica supported palladium-phosphine as a reusable catalyst for alkoxycarbonylation and aminocarbonylation of aryl and heteroaryl iodides
Source: Royal Society of Chemistry journal article supplement (doi:10.1039/c5ra18692g), 2015-01-01

# **Silica supported palladium-phosphine as a reusable catalyst for Alkoxy carbonylation and Aminocarbonylation of aryl and heteroaryl iodides**

Rajendra S. Mane,<sup>a</sup> Takehiko Sasaki<sup>b</sup> and Bhalchandra M. Bhanage<sup>a,\*</sup>

<sup>a</sup> Department of Chemistry, Institute of Chemical Technology, Mumbai 400019, India.

E-mail: bm.bhanage@ictmumbai.edu.in, bm.bhanage@gmail.com

<sup>b</sup> Department of Complexity Science and Engineering, Graduate School of Frontier Sciences, The University of Tokyo, 5-1-5, Kashiwanoha, Kashiwa, Chiba 277-8561, Japan.

## ***Supporting Information***

### **Table of contents**

|                                                                                           |       |
|-------------------------------------------------------------------------------------------|-------|
| 1. General information.....                                                               | 2     |
| 2. General procedure for synthesis of silica supported palladium phosphine complexes..... | 2     |
| 3. General procedure for alkoxy carbonylation of aryl iodides.....                        | 3     |
| 4. General procedure for aminocarbonylation of aryl iodides.....                          | 3     |
| 5. Characterization of fresh and spent catalyst.....                                      | 3-5   |
| 6. Spectral data of compounds.....                                                        | 6-14  |
| 7. References.....                                                                        | 15    |
| 8. List <sup>1</sup> H NMR and <sup>13</sup> C NMR .....                                  | 16-49 |

## **1. General information:**

### **Materials and Methods:**

All chemicals and reagents were purchased from Sigma Aldrich, S. D. fine chemical, Alfa Aesar and commercial suppliers. Solvents were purchased with high purity from commercial suppliers and used without purification. Reaction monitor by using Perkin Elmer Clarus 400 gas chromatography equipped with flame ionization detector with a capillary column (Elite-1, 30 m × 0.32 mm × 0.25 μm). GC-MS-QP 2010 instrument (Rtx-17, 30 m × 25 mm ID, film thickness (df) = 0.25 μm, was used for the mass analysis of the products. Products were purified by column chromatography on silica (100-200 mesh). The <sup>1</sup>H NMR spectrum was recorded on Bruker- 400 and 500 MHz spectrometer in CDCl<sub>3</sub> using tetramethylsilane (TMS) as internal standard. The <sup>13</sup>C NMR spectrum was recorded on Bruker-101 and 126 MHz spectrometer in CDCl<sub>3</sub>. Chemical shifts are reported in parts per million (δ) relative to tetramethylsilane as internal standard. The *J* (coupling constant) values were described in Hz. Splitting patterns of proton are depicted as s (singlet), d (doublet), t (triplet) and m (multiplet). The products were confirmed by the comparison of their GC-MS spectra, and/or <sup>1</sup>H and <sup>13</sup>C NMR spectra with those of authentic data.

## **2. General procedure for the synthesis of silica supported palladium phosphine complex.**

### **2.1. Preparation of PdCl<sub>2</sub>\_PPh<sub>2</sub>Et@SiO<sub>2</sub> (I)**

The silica supported PdCl<sub>2</sub>\_PPh<sub>2</sub>Et was prepared as, in 100 ml round bottom flask 0.372 g of PdCl<sub>2</sub> and 3.0 g of PPh<sub>2</sub>EtSiO<sub>2</sub> (Aldrich 538019-5G, 2-diphenylphosphinoethyl functionalized silica, 0.7 mmol/g) were mixed, stirred and refluxed with acetonitrile under nitrogen atmosphere for 48 hours. The material showing yellow was filtered with 0.45 μm PTFE filter, washed with acetonitrile several time and dried at room temperature. The metal loading of PdCl<sub>2</sub>\_PPh<sub>2</sub>Et@SiO<sub>2</sub> was 6.6 wt% as determined by XRF measurements (SEA-2010, Seiko Electronic Industrial Co.).

### **2.2. Preparation of Pd(OAc)<sub>2</sub>\_PPh<sub>2</sub>Et@SiO<sub>2</sub> (II)**

The silica supported Pd(OAc)<sub>2</sub>\_PPh<sub>2</sub>Et was prepared as, in 100 mL round bottom flask 0.472 g of Pd(OAc)<sub>2</sub> and 3.0 g of PPh<sub>2</sub>EtSiO<sub>2</sub> (Aldrich 538019-5G, 2-diphenylphosphinoethyl functionalized silica, 0.7 mmol/g) were mixed, stirred and refluxed with acetonitrile under nitrogen atmosphere for 48 hours. The material showing yellow was filtered with 0.45 μm PTFE filter, washed with acetonitrile several time and dried at room temperature. The metal loading of Pd(OAc)<sub>2</sub>\_PPh<sub>2</sub>Et@SiO<sub>2</sub> was 6.4 wt % as determined by XRF measurements (SEA-2010, Seiko Electronic Industrial Co.).

### 3. General experimental procedure for the alkoxy-carbonylation of aryl iodides:

To a 100 mL autoclave, aryl iodide (1 mmol), alcohol (5 mL), Pd catalyst (**I**) (0.5-1.0 mol%), and Et<sub>3</sub>N (3 mmol) were added. The autoclave was closed, purged three times with nitrogen and finally pressurized with 0.5 MPa of carbon monoxide, and heated at 100 °C for 1-2 h. After the completion of the reaction, the reactor was cooled to room temperature, and the remaining CO gas was vented carefully, and the reactor was opened. The reactor vessel was thoroughly washed with ethyl acetate (2 × 10 mL) to remove any traces of product and catalyst if present. The catalyst was filtered, and the reaction mixture was evaporated under vacuum. The residue obtained was purified by column chromatography (silica gel, 100–200 mesh; petroleum ether/ethyl acetate, 95:05) to afford the desired product.

### 4. General experimental procedure for the aminocarbonylation of aryl iodides:

To a 100 mL autoclave, aryl iodide (1 mmol), amine (2 mmol), Pd catalyst (**I**) (0.5 - 1.0 mol%), toluene (8 mL), and Et<sub>3</sub>N (3 mmol) were added. The autoclave was closed, purged three times with carbon monoxide, pressurized with 0.5 MPa of CO, and heated at 100 °C for 8 h (the ensuing procedure is the same as that discussed above for the alkoxy-carbonylation reaction).

### 5. Characterization of fresh and spent PdCl<sub>2</sub>\_PPh<sub>2</sub>Et@SiO<sub>2</sub> catalyst:

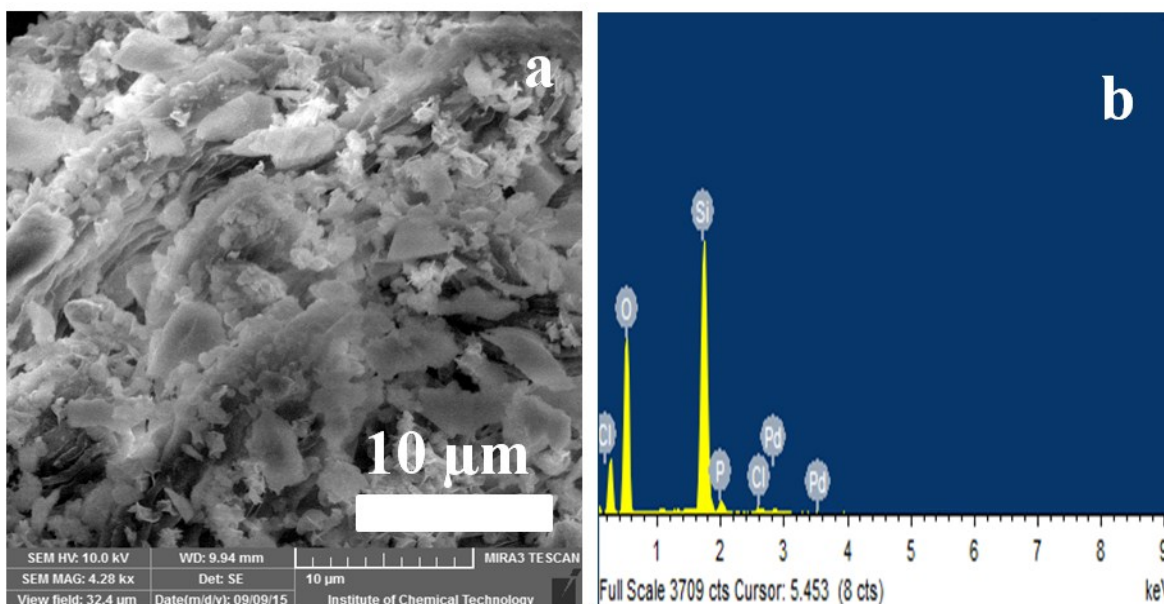

**Figure S1** The (a) FEG-SEM (Scanning Electron Microscope) image and (b) EDS (Energy Dispersive X-Ray Spectroscopy) spectrum of fresh PdCl<sub>2</sub>\_Ph<sub>2</sub>PEt@SiO<sub>2</sub> catalyst.

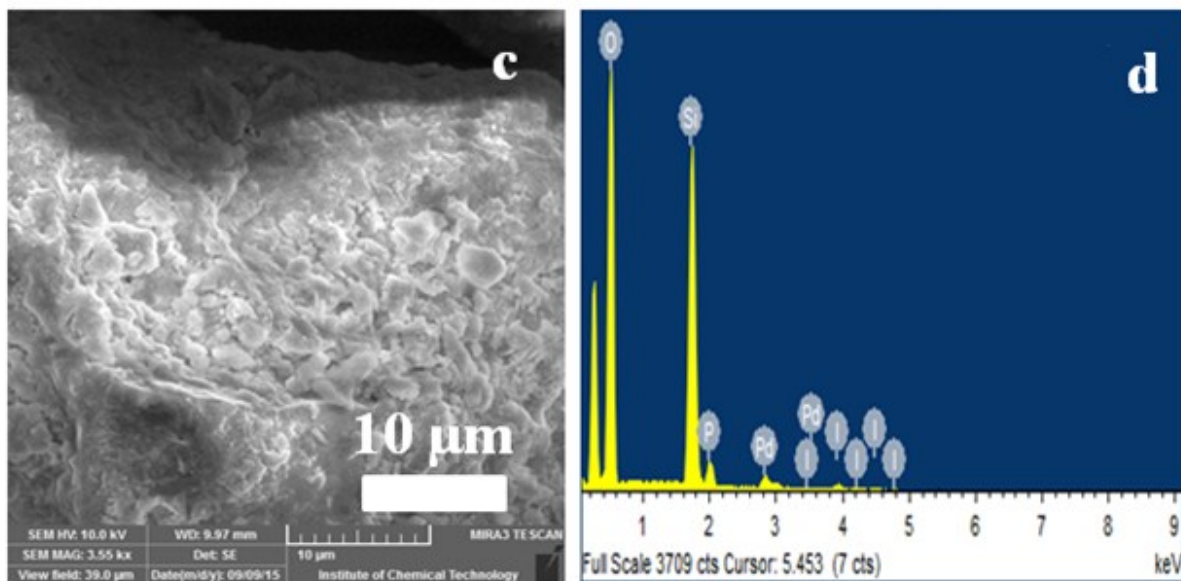

**Figure S2** The (c) FEG-SEM image and (d) EDS spectrum of the 1<sup>st</sup> recycled PdCl<sub>2</sub>\_Ph<sub>2</sub>PEt@SiO<sub>2</sub> catalyst.

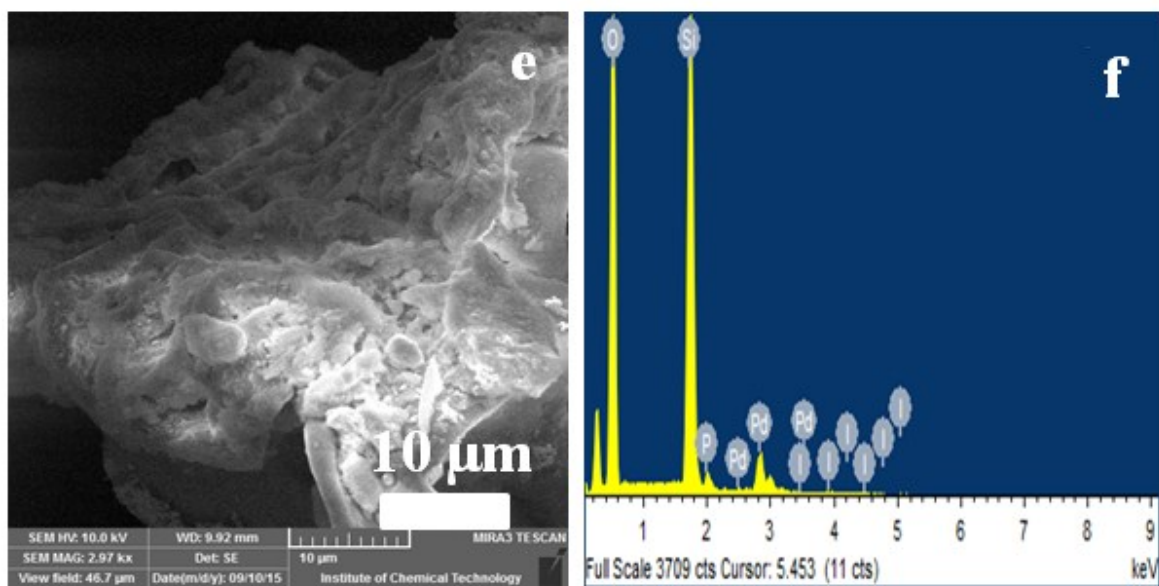

**Figure S3** The (e) FEG-SEM image and (f) EDS spectrum images of the 4<sup>th</sup> recycled PdCl<sub>2</sub>\_Ph<sub>2</sub>PEt@SiO<sub>2</sub> catalyst.

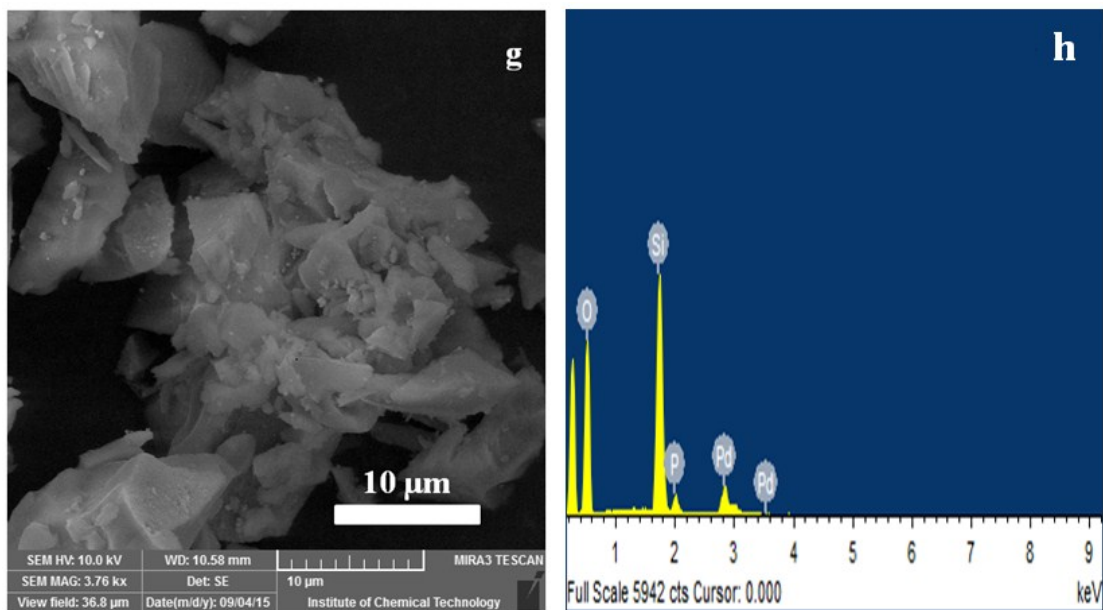

**Figure S4** The (g) FEG-SEM image and (h) EDS spectrum images of fresh  $\text{Pd}(\text{OAc})_2\text{-Ph}_2\text{PEt}@\text{SiO}_2$  catalyst.

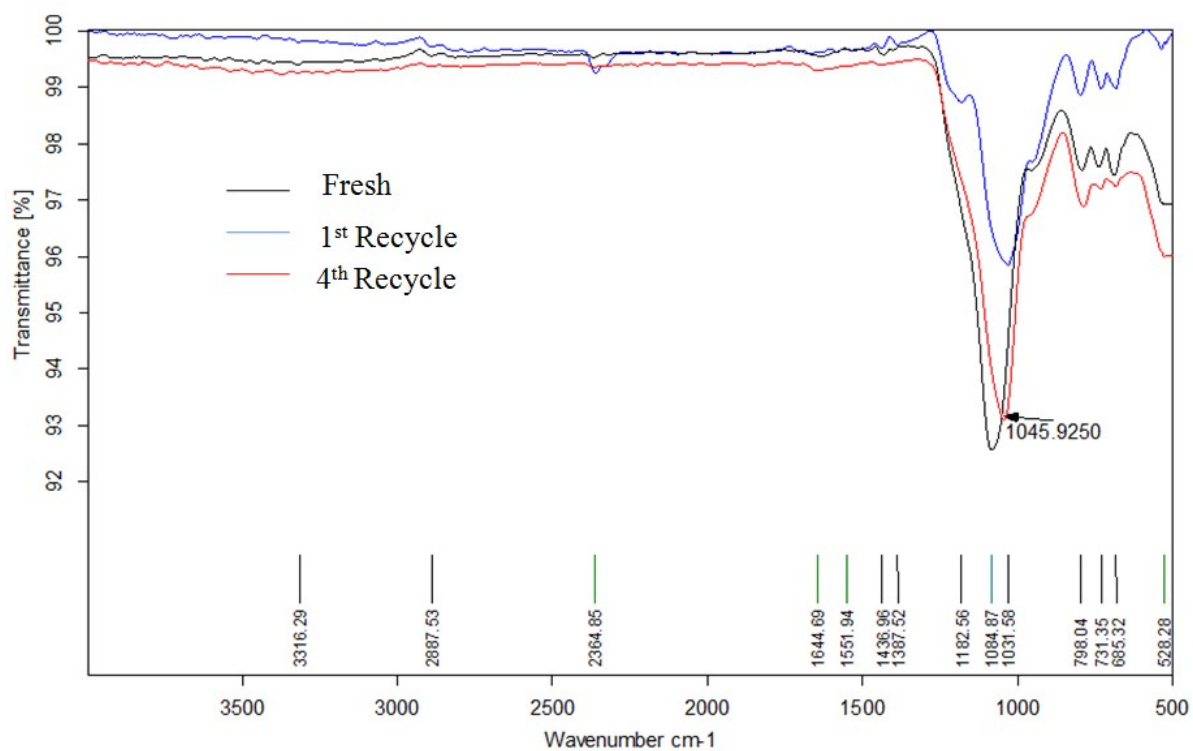

**Figure S4** The FT-IR spectrum of fresh and spent recycled  $\text{PdCl}_2\text{-Ph}_2\text{PEt}@\text{SiO}_2$  catalyst.

## 6. Spectral data of products:

### Methyl Benzoate (2a)

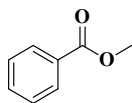

**<sup>1</sup>H NMR** (500 MHz, CDCl<sub>3</sub>)  $\delta$  8.00 – 7.98 (m, 2H), 7.46 (tt,  $J$  = 6.9, 1.4 Hz, 1H), 7.37 – 7.33 (m, 2H), 3.83 (d,  $J$  = 1.8 Hz, 3H); **<sup>13</sup>C NMR** (126 MHz, CDCl<sub>3</sub>)  $\delta$  166.92, 166.91, 132.82, 130.09, 129.48, 128.27, 51.92 ppm; **GC-MS** (EI, 70 eV):  $m/z$  (%) = 136 [M<sup>+</sup>] (36), 105 (100), 92 (4), 77 (61), 51 (19).

### Ethyl Benzoate (2b)

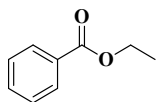

**<sup>1</sup>H NMR** (500 MHz, CDCl<sub>3</sub>)  $\delta$  7.99 – 7.97 (m, 2H), 7.43 – 7.31 (m, 3H), 4.28 (qd,  $J$  = 7.1, 2.6 Hz, 2H), 1.29 (td,  $J$  = 7.1, 2.8 Hz, 3H); **<sup>13</sup>C NMR** (126 MHz, CDCl<sub>3</sub>)  $\delta$  166.36, 132.67, 130.42, 129.41, 128.19, 60.76, 14.18 ppm; **GC-MS** (EI, 70 eV):  $m/z$  (%) = 150 [M<sup>+</sup>] (23.19), 122 (34), 105 (100), 77 (50), 51 (22).

### *tert*-butyl Benzoate (2c)

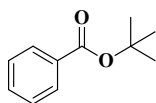

**<sup>1</sup>H NMR** (500 MHz, CDCl<sub>3</sub>)  $\delta$  8.01 (d,  $J$  = 8.1 Hz, 2H), 7.55 – 7.49 (m, 1H), 7.38 (t,  $J$  = 7.7 Hz, 2H), 1.59 (s, 9H); **<sup>13</sup>C NMR** (126 MHz, CDCl<sub>3</sub>)  $\delta$  165.82, 133.71, 130.16, 128.79, 128.47, 28.20 ppm; **GC-MS** (EI, 70 eV):  $m/z$  (%) = 178 [M<sup>+</sup>] (1), 123 (100), 105 (93), 77 (42), 56 (64), 55 (33), 51 (14), 41 (27).

### Cyclohexyl Benzoate (2d)

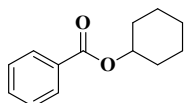

**<sup>1</sup>H NMR** (500 MHz, CDCl<sub>3</sub>)  $\delta$  8.07 – 8.05 (m, 1H), 7.49 – 7.39 (dd,  $J$  = 15.1, 11.3 Hz, 3H), 5.04 (ddd,  $J$  = 12.7, 8.5, 3.8 Hz, 1H), 1.95 (dd,  $J$  = 12.2, 5.3 Hz, 1H), 1.81 – 1.79 (m, 1H), 1.62 – 1.56 (m, 2H), 1.49 – 1.27 (m, 6H); **<sup>13</sup>C NMR** (126 MHz, cdcl<sub>3</sub>)  $\delta$  166.05, 133.69, 132.70, 130.96, 129.52, 128.27, 73.07, 31.62, 25.47, 23.65 ppm; **GC-MS** (EI, 70 eV):  $m/z$  (%) = 204 [M<sup>+</sup>] (1), 177 (4), 123 (86.6), 105 (100), 82 (21), 77 (48), 67 (21), 55 (9), 41 (11).

### Phenyl Benzoate (2e)

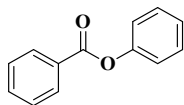

**<sup>1</sup>H NMR** ((500 MHz, CDCl<sub>3</sub>) δ 8.25 (d, *J* = 8.3 Hz, 2H), 7.69 – 7.64 (m, 1H), 7.54 (t, *J* = 7.6 Hz, 2H), 7.46 (t, *J* = 7.7 Hz, 2H), 7.31 (td, *J* = 7.7, 0.9 Hz, 1H), 7.25 (d, *J* = 8.5 Hz, 2H); **<sup>13</sup>C NMR** (126 MHz, cdcl<sub>3</sub>) δ 165.22, 150.97, 133.62, 130.19, 129.53, 128.60, 125.92, 121.75 ppm; **GC-MS** (EI, 70 eV): *m/z* (%) = 198 [M<sup>+</sup>] (4), 105 (100), 77 (40.5), 65 (4), 50 (11).

### Benzyl Benzoate (2f)

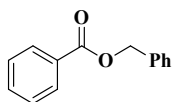

**<sup>1</sup>H NMR** (400 MHz, CDCl<sub>3</sub>): δ 8.02 (dd, 2H, 8 Hz), 7.55-7.35 (m, 8H), 5.36 (s, 2H); **<sup>13</sup>C NMR** (101 MHz, CDCl<sub>3</sub>): δ 166.42, 136.01, 133.02, 130.08, 129.68, 128.58, 128.36, 128.23, 128.15, 66.68 ppm; **GC-MS** (EI, 70 eV): *m/z* (%) = 212 [M<sup>+</sup>] (16.90), 105 (100), 91(49.35), 77 (32.70), 65 (12), 51 (11.83).

### Methyl 4-methylbenzoate (2g)

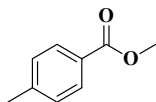

**<sup>1</sup>H NMR** (500 MHz, CDCl<sub>3</sub>) δ 7.93 (d, *J* = 8.1 Hz, 2H), 7.22 (dd, *J* = 7.9, 0.4 Hz, 2H), 3.89 (d, *J* = 0.7 Hz, 3H), 2.39 (s, 3H); **<sup>13</sup>C NMR** (126 MHz, CDCl<sub>3</sub>) δ 167.16, 143.53, 129.57, 129.04, 127.38, 77.35, 77.09, 76.84, 51.91, 21.60 ppm; **GC-MS** (EI, 70 eV): *m/z* (%) = 150 [M<sup>+</sup>] (49), 119 (100), 91 (53.96), 90 (24), 65 (21.86), 51 (4).

### Methyl 2-methylbenzoate (2h)

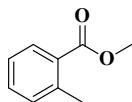

**<sup>1</sup>H NMR** (500 MHz, CDC<sub>3</sub>) δ 7.91 (d, *J* = 7.5 Hz, 1H), 7.39 (d, *J* = 7.5 Hz, 1H), 7.27 (dd, *J* = 5.6, 4.9 Hz, 2H), 3.90 (d, 3H), 2.61 (s, 3H); **<sup>13</sup>C NMR** (126 MHz, CDCl<sub>3</sub>) δ 168.10, 140.16, 131.95, 131.84, 131.66, 130.54, 125.67, 51.82, 29.70, 21.72 ppm; **GC-MS** (EI, 70 eV): *m/z* (%) = 150 [M<sup>+</sup>] (46), 135 (7), 119 (100), 118 (74), 91(77.4), 90 (24), 89 (14), 65 (25), 63 (10), 51 (5).

### Methyl 4-methoxybenzoate (2i)

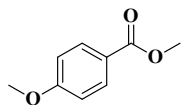

**<sup>1</sup>H NMR** (400 MHz, CDCl<sub>3</sub>):  $\delta$  7.97-7.95 (d, 2H, 8 Hz), 6.89-6.87 (d, 2H, 8Hz), 3.85 (s, 3H), 3.81 (s, 3H); **<sup>13</sup>C NMR** (101 MHz, CDCl<sub>3</sub>):  $\delta$  166.82, 163.26, 131.53, 122.50, 113.54, 55.35, 51.83 ppm;

**GC-MS** (EI, 70 eV):  $m/z$  (%) = 166 [M<sup>+</sup>] (35.63), 135 (100), 107 (17.56), 92 (15.25), 77 (23.87), 63 (9).

### Methyl 2-methoxybenzoate (2j)

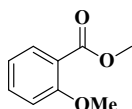

**<sup>1</sup>H NMR** (500 MHz, CDCl<sub>3</sub>)  $\delta$  7.80 – 7.78 (m, 1H), 7.46 – 7.44 (m, 1H), 6.99 (dd,  $J$  = 7.4, 2.2 Hz, 2H), 3.89 (dd,  $J$  = 6.6, 1.2 Hz, 6H); **<sup>13</sup>C NMR** (126 MHz, CDCl<sub>3</sub>)  $\delta$  166.72, 159.07, 133.54, 131.64, 120.10, 111.97, 111.61, 55.95, 52.02 ppm; **GC-MS** (EI, 70 eV):  $m/z$  (%) = 166 [M<sup>+</sup>] (24.3), 135 (100), 133 (44), 105 (16), 92 (20), 77 (47.5), 63 (10), 51 (7).

### Methyl 4-hydroxybenzoate (2k)

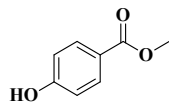

**<sup>1</sup>H NMR** (400 MHz, CDCl<sub>3</sub>):  $\delta$  7.90-7.87 (d, 2H, 8 Hz), 6.84-6.82 (d, 2H, 8Hz), 4.34 (bs, 1H), 3.86 (s, 3H); **<sup>13</sup>C NMR** (101 MHz, CDCl<sub>3</sub>):  $\delta$  171.60, 165.57, 135.60, 135.60, 124.87, 118.87, 55.60 ppm;

**GC-MS** (EI, 70 eV):  $m/z$  (%) = 152 [M<sup>+</sup>] (37.6), 121 (100), 93 (27.3), 65 (23.4).

### Methyl 4-aminobenzoate (2l)

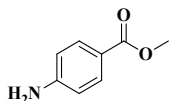

**<sup>1</sup>H NMR** (400 MHz, CDCl<sub>3</sub>):  $\delta$  7.82-7.80 (d, 2H, 8 Hz), 6.60-6.58 (d, 2H, 8Hz), 4.02 (bs, 2H), 3.81 (s, 3H); **<sup>13</sup>C NMR** (101 MHz, CDCl<sub>3</sub>):  $\delta$  167.26, 151.02, 131.55, 138.14, 113.74, 51.62 ppm; **GC-MS** (EI, 70 eV):  $m/z$  (%) = 151 [M<sup>+</sup>] (45), 120 (100), 92 (37), 65 (34), 39 (13).



### Methyl 3-nitrobenzoate (2m)

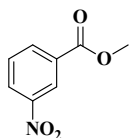

$^1\text{H NMR}$  (400 MHz,  $\text{CDCl}_3$ ):  $\delta$  8.83 (s, 1H), 8.38-8.33 (dd, 3H, 8Hz), 3.96 (s, 3H);  $^{13}\text{C NMR}$  (101 MHz,  $\text{CDCl}_3$ ):  $\delta$  164.92, 148.20, 135.25, 131.79, 129.62, 127.37, 124.55, 52.79 ppm; **GC-MS** (EI, 70 eV):  $m/z$  (%) = 181 [ $\text{M}^+$ ] (28), 150 (100), 135 (9), 120 (10), 104 (37.8), 76 (38), 50 (27), 39 (4).

### Methyl 4-Nitrobenzoate (2n)

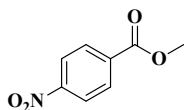

$^1\text{H NMR}$  (500 MHz,  $\text{CDCl}_3$ )  $\delta$  8.29 – 8.24 (m, 2H), 8.21 – 8.15 (m, 2H), 3.96 (d,  $J = 0.8$  Hz, 3H);  $^{13}\text{C NMR}$  (126 MHz,  $\text{CDCl}_3$ ):  $\delta$  165.15, 150.48, 135.44, 130.68, 123.51, 113.73, 77.31, 77.06, 76.80, 52.83 ppm; **GC-MS** (EI, 70 eV):  $m/z$  (%) = 181 [ $\text{M}^+$ ] (3), 180 (29), 164 (23.84), 150 (100), 120 (22.56), 104 (28.55), 92 (19.6), 76 (25.75), 50 (17).

### 4-(methoxycarbonyl)benzoic acid (2p)

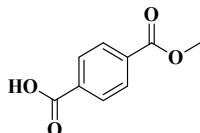

$^1\text{H NMR}$  (400 MHz,  $\text{CDCl}_3$ ):  $\delta$  8.12-8.11 (d, 4H), 3.96 (s, 3H);  $^{13}\text{C NMR}$  (101 MHz,  $\text{CDCl}_3$ ):  $\delta$  171.77, 170.62, 139.47, 137.47, 138.62, 133.30, 56.25 ppm; **GC-MS** (EI, 70 eV):  $m/z$  (%) = 180 [ $\text{M}^+$ ] (28.60), 149 (100), 121 (26.90), 76 (8.7), 65 (27.4), 50 (10.60), 40 (10.10).

### Methyl 1-naphthoate (2r)

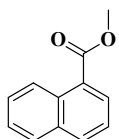

$^1\text{H NMR}$  (500 MHz,  $\text{CDCl}_3$ )  $\delta$  8.77 (d,  $J = 7.8$  Hz, 1H), 8.16 (d,  $J = 7.8$  Hz, 1H), 7.87 (dd,  $J = 7.7$ , 1.6 Hz, 1H), 7.74 – 7.70 (m, 1H), 7.54 – 7.51 (m, 2H), 7.50 (dd,  $J = 7.6$ , 4.7 Hz, 1H), 4.02 (s, 3H);  $^{13}\text{C NMR}$  (126 MHz,  $\text{CDCl}_3$ )  $\delta$  167.66, 132.20, 130.94, 130.06, 128.83, 128.26, 127.01, 125.16, 124.45, 123.97, 52.93 ppm; **GC-MS** (EI, 70 eV):  $m/z$  (%) = 186 [ $\text{M}^+$ ] (69), 155 (100), 127 (98.63), 101 (6), 77 (11), 63 (10), 51 (4).

### Methyl picolinate (Table 3, entry 1)

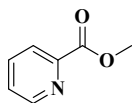

**<sup>1</sup>H NMR** (500 MHz, CDCl<sub>3</sub>):  $\delta$  8.77 (d,  $J$  = 4.7 Hz, 1H), 8.16 (d,  $J$  = 7.8 Hz, 1H), 7.74 – 7.71 (m, 1H), 7.51 – 7.49 (m, 1H), 4.02 (s, 3H); **<sup>13</sup>C NMR** (126 MHz, CDCl<sub>3</sub>):  $\delta$  165.69, 149.79, 147.86, 137.11, 127.01, 125.16, 52.93 ppm; **GC-MS** (EI, 70 eV):  $m/z$  (%) = 137 [M<sup>+</sup>] (4), 107 (30), 106 (11), 79 (100), 78 (69), 51 (22).

### Methyl nicotinate (Table 3, entry 2)

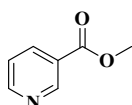

**<sup>1</sup>H NMR** (400 MHz, CDCl<sub>3</sub>)  $\delta$  9.23 (s, 1H), 8.77 (s, 1H), 8.27-8.25 (d,  $J$  = 7.6 Hz, 1H), 7.37-8.35 (dd,  $J$  = 6.4, 3.1 Hz, 1H), 3.89 (s, 3H) ppm; **GC-MS** (EI, 70 eV):  $m/z$  (%) = 137 [M<sup>+</sup>] (52.5), 136 (27.6), 106 (100), 78 (79), 51 (33), 50 (15).

### Methyl thiophene-2-carboxylate (Table 3, entry 3)

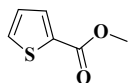

**<sup>1</sup>H NMR** (500 MHz, CDCl<sub>3</sub>):  $\delta$  87.87 – 7.71 (m, 1H), 7.63 – 7.48 (m, 1H), 7.14 – 7.02 (m, 1H), 3.88 (d,  $J$  = 0.7 Hz, 3H); **<sup>13</sup>C NMR** (126 MHz, CDCl<sub>3</sub>):  $\delta$  162.69, 133.53, 133.46, 132.35, 127.73, 77.32, 77.06, 76.81, 52.14 ppm; **GC-MS** (EI, 70 eV):  $m/z$  (%) = 142 [M<sup>+</sup>] (46.67), 112 (8), 111 (100), 83 (18.62), 44 (6).

### Methyl 1H-indole-5-carboxylate (Table 3, entry 4)

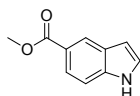

**<sup>1</sup>H NMR** (400 MHz, CDCl<sub>3</sub>):  $\delta$  8.72 (bs, 1H), 8.43 (s, 1H), 7.91-7.89 (dd, 1H, 8Hz), 7.39-7.37 (dd, 1H, 8Hz), 7.24 (s, 1H), 6.83 (s, 1H), 3.93 (s, 3H); **<sup>13</sup>C NMR** (101 MHz, CDCl<sub>3</sub>):  $\delta$  168.50, 138.46, 127.44, 125.71, 123.71, 123.24, 121.68, 110.85, 103.85, 51.94 ppm; **GC-MS** (EI, 70 eV):  $m/z$  (%) = 175 [M<sup>+</sup>] (63.90), 144 (100), 116(63.40), 89 (25.70), 63 (12.30), 58 (11.70).

**Methyl 1*H*-pyrazole-4-carboxylate (Table 3, entry 5)**

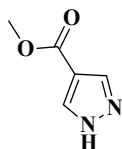

**<sup>1</sup>H NMR** (400 MHz, DMSO-*d*<sub>6</sub>):  $\delta$  13.40 (bs, 1H, NH), 8.27 (s, 1H), 7.86 (s, 1H), 3.70 (s, 3H); **<sup>13</sup>C NMR** (101 MHz, DMSO-*d*<sub>6</sub>):  $\delta$  163.98, 136.26, 114.13, 51.41 ppm; **GC-MS** (EI, 70 eV): *m/z* (%) = 126 [*M*<sup>+</sup>] (31), 96 (6.3), 95 (100), 68 (7), 39 (14.83), 31 (1).

**Ethyl 1*H*-pyrazole-4-carboxylate (Table 3, entry 6)**

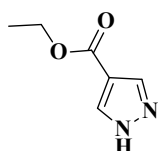

**<sup>1</sup>H NMR** (400 MHz, DMSO-*d*<sub>6</sub>):  $\delta$  13.38 (bs, 1H, NH), 8.28 (s, 1H), 7.84 (s, 1H), 4.17 (q, 2H), 1.21 (t, 3H); **<sup>13</sup>C NMR** (101 MHz, DMSO-*d*<sub>6</sub>):  $\delta$  163.11, 140.50, 132.57, 113.96, 59.92, 14.73 ppm; **GC-MS** (EI, 70 eV): *m/z* (%) = 140 [*M*<sup>+</sup>] (17), 112 (41), 95 (100), 68 (9), 40 (8).

***N,N*-diethylbenzamide (3a)**

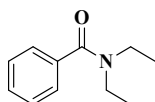

**<sup>1</sup>H NMR** (400 MHz, CDCl<sub>3</sub>):  $\delta$  7.29 (m, 5H), 3.48 (s, 2H), 3.19 (s, 2H), 1.18 (s, 3H), 1.04 (s, 3H); **<sup>13</sup>C NMR** (101 MHz, CDCl<sub>3</sub>):  $\delta$  171.28, 137.13, 129.05, 128.33, 126.17, 77.43, 77.11, 76.79, 43.24, 39.19, 14.15, 12.84.; **GC-MS** (EI, 70 eV): *m/z* (%) = 177 [*M*<sup>+</sup>] (11), 176 (33), 105 (100), 77 (40), 51 (9).

***N,N*-dibutylbenzamide (3b)**

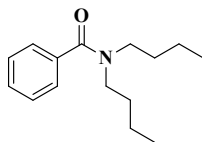

**<sup>1</sup>H NMR** (400 MHz, CDCl<sub>3</sub>)  $\delta$  7.39 – 7.28 (m, 5H), 3.49 (s, 2H), 3.18 (s, 2H), 1.65 (s, 2H), 1.43 (dd, *J* = 20.4, 12.6 Hz, 4H), 1.13 (d, *J* = 6.7 Hz, 2H), 0.98 (s, 3H), 0.79 (d, *J* = 6.5 Hz, 3H) ppm; **<sup>13</sup>C NMR** (101 MHz, CDCl<sub>3</sub>)  $\delta$  171.65, 137.19, 129.85, 128.95, 128.25, 128.14, 126.35, 48.71, 44.40, 30.72, 29.56, 20.23, 19.66, 13.87, 13.54, 13.54 ppm; **GC-MS** (EI, 70 eV): *m/z* (%) = 233 (9) [*M*<sup>+</sup>], 232 (11), 190 (8), 148 (5), 134 (4), 105 (100), 77 (26), 51 (4), 40 (13).

### *N,N*-dipropylbenzamide (3c)

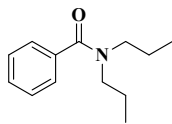

**<sup>1</sup>H NMR** (400 MHz, CDCl<sub>3</sub>) δ 7.35 – 7.32 (m, 3H), 7.30 (dd, *J* = 7.3, 4.6, 2.3 Hz, 2H), 3.41 (s, 2H), 3.11 (s, 2H), 1.65 (d, *J* = 6.8 Hz, 2H), 1.48 (d, *J* = 6.8 Hz, 2H), 0.93 (t, *J* = 6.4 Hz, 3H), 0.70 (d, *J* = 6.4 Hz, 3H); **<sup>13</sup>C NMR** (101 MHz, CDCl<sub>3</sub>): δ 171.76, 137.31, 128.96, 126.37, 50.63, 46.22, 21.85, 20.65, 11.40, 10.97 ppm; **GC-MS** (EI, 70 eV): *m/z* (%) = 204 [M<sup>+</sup>] (11.64), 176 (5.71), 134 (6.88), 105 (100), 77 (34.64), 51 (6.69), 39 (36.08).

### *N*-(*tert*-butyl)benzamide (3d)

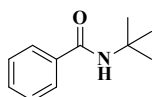

**<sup>1</sup>H NMR** (400 MHz, CDCl<sub>3</sub>): δ 7.70-7.68 (d, 2H, 8Hz), 7.44-7.36 (m, 3H), 5.95 (s, 1H), 1.45 (s, 9H); **<sup>13</sup>C NMR** (101 MHz, CDCl<sub>3</sub>): δ 166.90, 135.85, 131.05, 128.43, 126.66, 51.57, 28.83 ppm; **GC-MS** (EI, 70 eV): *m/z* (%) = 177 [M<sup>+</sup>] (11), 162 (12), 122 (14.9), 105 (100), 77 (44), 51 (13), 41 (8).

### Phenyl(pyrrolidin-1-yl)methanone (3e)

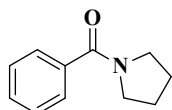

**<sup>1</sup>H NMR** (400 MHz, CDCl<sub>3</sub>) δ 7.47 – 7.44 (m, 2H), 7.36 – 7.32 (m, 3H), 3.59 (t, *J* = 7.0 Hz, 2H), 3.37 (t, *J* = 6.6 Hz, 2H), 1.90 (dd, *J* = 13.7, 6.5 Hz, 2H), 1.82 (dd, *J* = 13.1, 6.6 Hz, 2H); **<sup>13</sup>C NMR** (101 MHz, CDCl<sub>3</sub>): δ 169.70, 137.11, 129.74, 128.19, 127.00, 49.58, 46.14, 26.33, 24.41 ppm; **GC-MS** (EI, 70 eV): *m/z* (%) = 175 [M<sup>+</sup>] (3), 174 (17), 156 (9), 146 (10), 105 (100), 95 (8), 77 (68), 56 (13), 51 (27), 41 (13).

### Phenyl(piperidin-1-yl)methanone (3f)

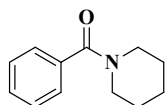

**<sup>1</sup>H NMR** (400 MHz, CDCl<sub>3</sub>): δ 7.34 (m, 5H), 3.66 (s, 2H), 3.29 (s, 2H), 1.62 (s, 4H), 1.46 (s, 2H); **<sup>13</sup>C NMR** (101 MHz, CDCl<sub>3</sub>): δ 170.28, 136.40, 129.32, 128.36, 126.71, 48.73, 43.07, 26.50, 25.58, 24.53 ppm; **GC-MS** (EI, 70 eV): *m/z* (%) = 188 [M<sup>+</sup>] (73.80), 160 (2.19), 105 (100), 84(10), 77 (67.40), 51 (19.09).

### Morpholino(phenyl)methanone (3g)

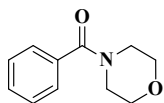

**<sup>1</sup>H NMR** (400 MHz, CDCl<sub>3</sub>)  $\delta$  7.42 – 7.39 (m, 5H), 3.83 – 3.38 (m, 8H); **<sup>13</sup>C NMR** (101 MHz, CDCl<sub>3</sub>)  $\delta$  170.43, 135.15, 129.85, 128.51, 127.01, 66.80, 48.17, 42.50, 20.65; **GC-MS** (EI, 70 eV):  $m/z$  (%) = 191 [M<sup>+</sup>] (8), 190 (25.58), 176 (7), 105 (100), 91 (5), 86 (12), 77 (48), 56 (14), 51 (14).

### *N,N*-diallylbenzamide (3h)

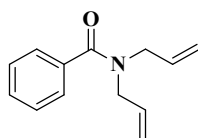

**<sup>1</sup>H NMR** (400 MHz, CDCl<sub>3</sub>)  $\delta$  7.41 – 7.39 (m, 2H), 7.37 – 7.33 (m, 3H), 5.85 (s, 1H), 5.70 (s, 1H), 5.26 – 5.22 (d,  $J$  = 20.0 Hz, 1H), 5.19 (d,  $J$  = 1.0 Hz, 2H), 5.14 (s, 1H), 4.10 (s, 2H), 3.80 (s, 2H); **<sup>13</sup>C NMR** (101 MHz, CDCl<sub>3</sub>):  $\delta$  171.76, 136.15, 133.13, 132.69, 129.31, 128.33, 126.52, 117.61, 50.71, 46.92 ppm; **GC-MS** (EI, 70 eV):  $m/z$  (%) = 201 [M<sup>+</sup>] (3), 160 (9), 105 (100), 96 (6), 51 (11.25), 41 (10), 39 (8).

### *N*-allylbenzamide (3i)

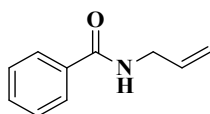

**<sup>1</sup>H NMR** (400 MHz, CDCl<sub>3</sub>)  $\delta$  7.82 – 7.70 (m, 2H), 7.50 – 7.41 (m, 1H), 7.37 (td,  $J$  = 7.0, 1.0 Hz, 2H), 6.63 (s, 1H), 5.96 – 5.80 (m,  $J$  = 16 Hz, 1H), 5.24 – 5.09 (m,  $J$  = 16 Hz, 2H), 4.02 (tt,  $J$  = 10 Hz, 2H); **<sup>13</sup>C NMR** (101 MHz, CDCl<sub>3</sub>):  $\delta$  167.56, 134.36, 134.12, 131.44, 128.49, 126.95, 116.49, 42.40 ppm; **GC-MS** (EI, 70 eV):  $m/z$  (%) = 161 [M<sup>+</sup>] (9), 146 (7), 105 (100), 77 (51), 56 (7), 51 (16), 39 (4).

### *N*-phenylbenzamide (3j)

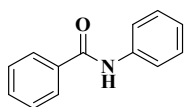

**<sup>1</sup>H NMR** (500 MHz, CDCl<sub>3</sub>)  $\delta$  7.95 (s, 1H), 7.87 (d,  $J$  = 8.1 Hz, 2H), 7.65 (d,  $J$  = 8.2 Hz, 2H), 7.58 – 7.53 (m, 1H), 7.47 (dd,  $J$  = 11.1, 4.0 Hz, 2H), 7.37 (t,  $J$  = 7.4 Hz, 2H), 7.18 – 7.14 (m, 1H); **<sup>13</sup>C NMR** (126 MHz, CDCl<sub>3</sub>)  $\delta$  165.83, 137.91, 134.97, 131.84, 129.09, 128.77, 127.03, 124.58, 120.24; **GC-MS** (EI, 70 eV):  $m/z$  (%) = 197 [M<sup>+</sup>] (43.6), 105 (100), 91 (6), 77 (48), 65 (9), 51 (13.83).

***N,N*-dibenzylbenzamide (3k)**

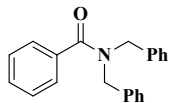

**<sup>1</sup>H NMR** (400 MHz, CDCl<sub>3</sub>)  $\delta$  7.50 – 7.48 (m, 2H), 7.38 – 7.31 (m, 8H), 7.29 (t,  $J$  = 7.0 Hz, 4H), 7.13 (d,  $J$  = 5.7 Hz, 2H), 4.70 (s, 2H), 4.39 (s, 2H); **<sup>13</sup>C NMR** (101 MHz, CDCl<sub>3</sub>):  $\delta$  172.26, 136.09, 129.65, 128.84, 128.71, 128.55, 128.39, 127.65, 127.51, 127.01, 126.68, 51.50, 46.81 ppm; **GC-MS** (EI, 70 eV):  $m/z$  (%) = 301 [M<sup>+</sup>] (8.1), 210 (31.20), 105 (100), 91(16.40), 77 (30.32), 65 (5.96), 51 (4).

***N*-benzylbenzamide (3l)**

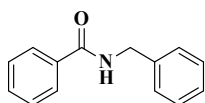

**<sup>1</sup>H NMR** (500 MHz, CDCl<sub>3</sub>)  $\delta$  7.80 (d,  $J$  = 8.0 Hz, 2H), 7.49 – 7.23 (m, 8H), 6.67 (bs, 1H), 4.62 (d,  $J$  = 5.7 Hz, 2H); **<sup>13</sup>C NMR** (126 MHz, CDCl<sub>3</sub>)  $\delta$  167.44, 138.21, 134.34, 131.54, 128.76, 128.57, 127.88, 127.57, 126.99, 44.09, 29.71; **GC-MS** (EI, 70 eV):  $m/z$  (%) = 211 [M<sup>+</sup>] (56), 210 (21), 106 (28), 105 (100), 91 (10), 77 (59), 51 (14).

## 7. References

1. X. F. Wu, C. Darcel, *Eur. J. Org. Chem.*, 2009, 1147.
2. N. Samuel, K. L. Hull, *Org. Lett.*, 2015 17, 3236.
3. J. D. Moore, R. J. Byrne, P. Vedantham, D. L. Flynn, P. R. Hanson, *Org. Lett.*, 2003, 5, 4241.
4. S. D. Sarkar, S. Grimme, A. Studer, *J. Am. Chem. Soc.*, 2010, 132, 1190.
5. W. Han, F. Jin, Q. Zhou, *Synthesis*, 2015, 47, 1861.
6. Y. Yamamoto, *Adv. Synth. Catal.*, 2010, 352, 478.
7. J. A. Walker, C. Bazaral, T. Leavey, P. G. Dormer, J. A. Murry, *Org. Lett.*, 2004, 6, 2100.
8. J. Liu, J. Chen, C. Xia, *J. Catal.*, 2008, 253, 56.
9. W. J. Ang, L.-C. Lo and Y. Lam, *Tetrahedron*, 2014, 70, 8545.
10. T. T. Dang, Y. Zhu, J. S. Y. Ngiam, S. C. Ghosh, A. Chen, A. M. Seayad, *ACS Catal.*, 2013, 3, 1410.
11. A. S. Prasad, B. Satyanarayana, *J. Mol. Catal. A: Chem.*, 2013, 370, 209.
12. Y. Lei, L. Wu, X. Zhang, M. Hui, Y. Gu, Li. Guangxing, *J. Mol. Catal. A: Chem.*, 2015, 398, 169.
13. M. V. Khedkar, T. Sasaki and B. M. Bhanage, *ACS Catal.*, 2013, 3, 293.
14. H. Mei, J. Hu, S. Xiao, Y. Lei, G. Li, *Appl. Catal., A*, 2014, 475, 40.
15. E. D. Anderson and D. L. Boger, *J. Am. Chem. Soc.*, 2011, 133 (31), 12285.
16. P. Toto, J. Chenault, A. E. Hakmaoui, M. Akssira, G. Guillaumet, *Synth. Commun.*, 2008, 38, 674.

## 8. List $^1\text{H}$ NMR and $^{13}\text{C}$ NMR of products

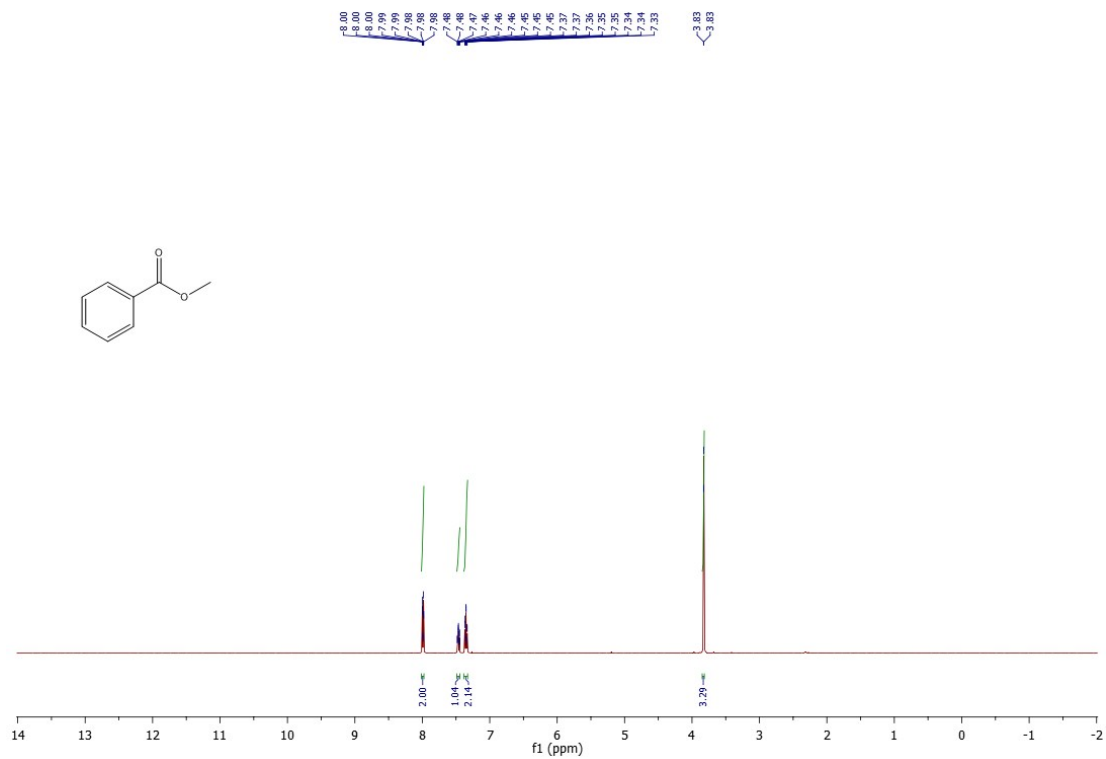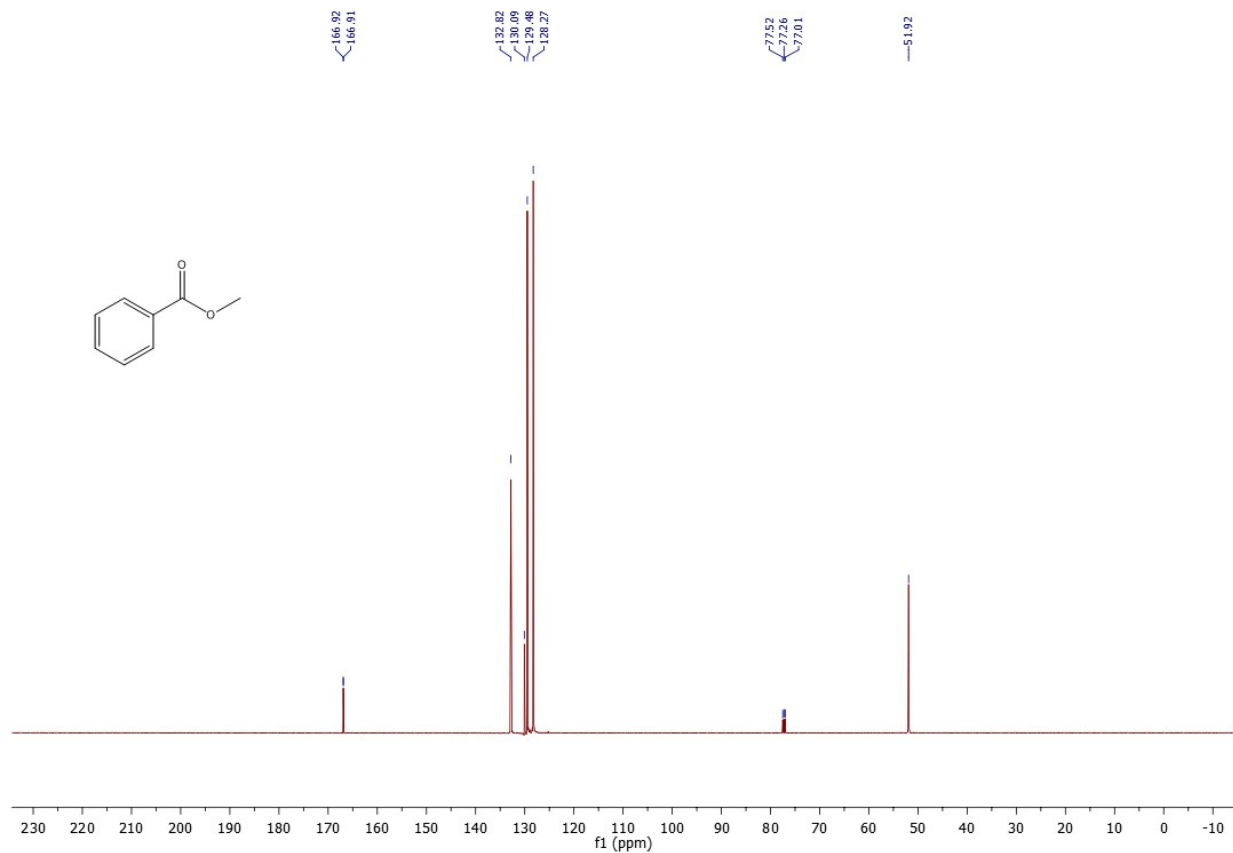



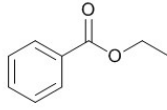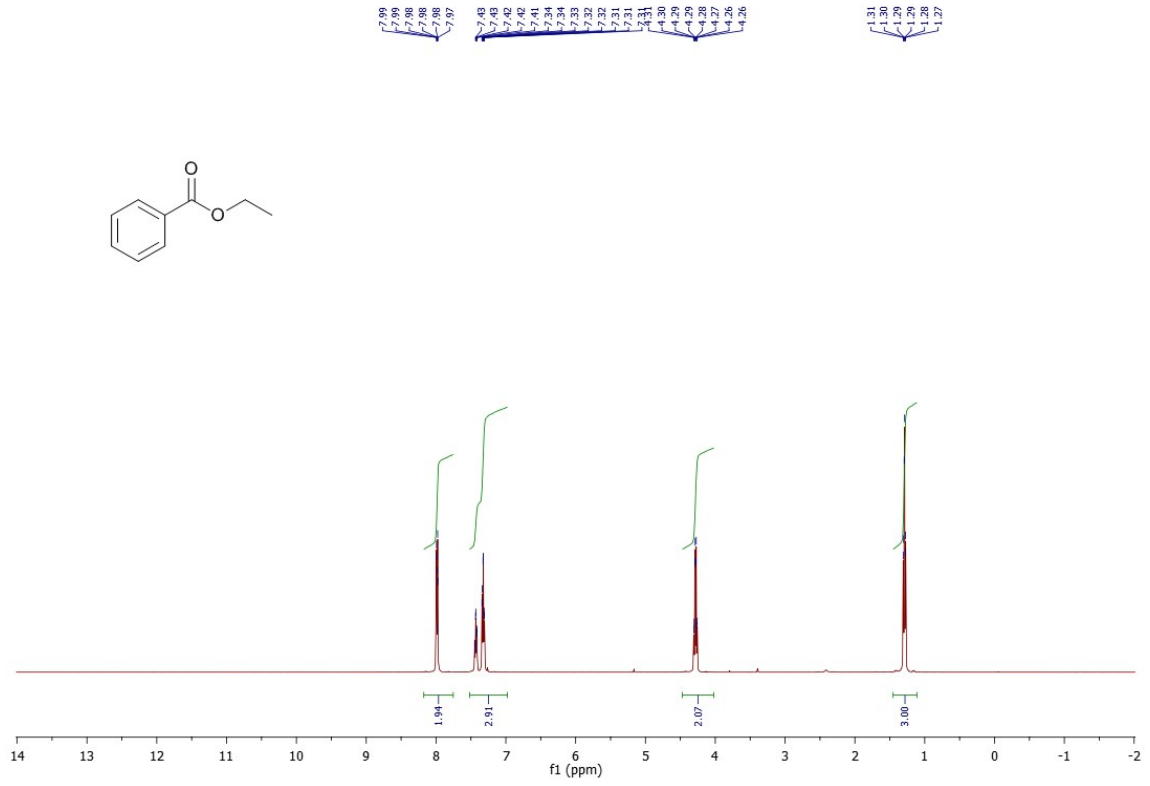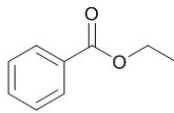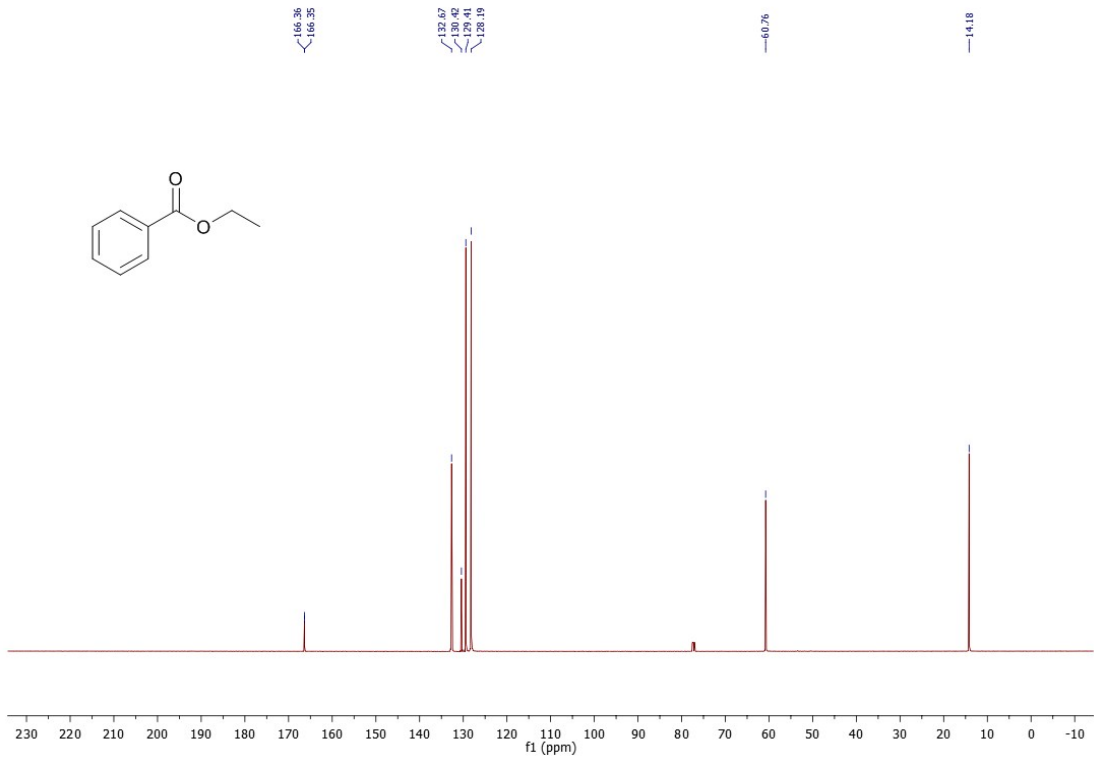

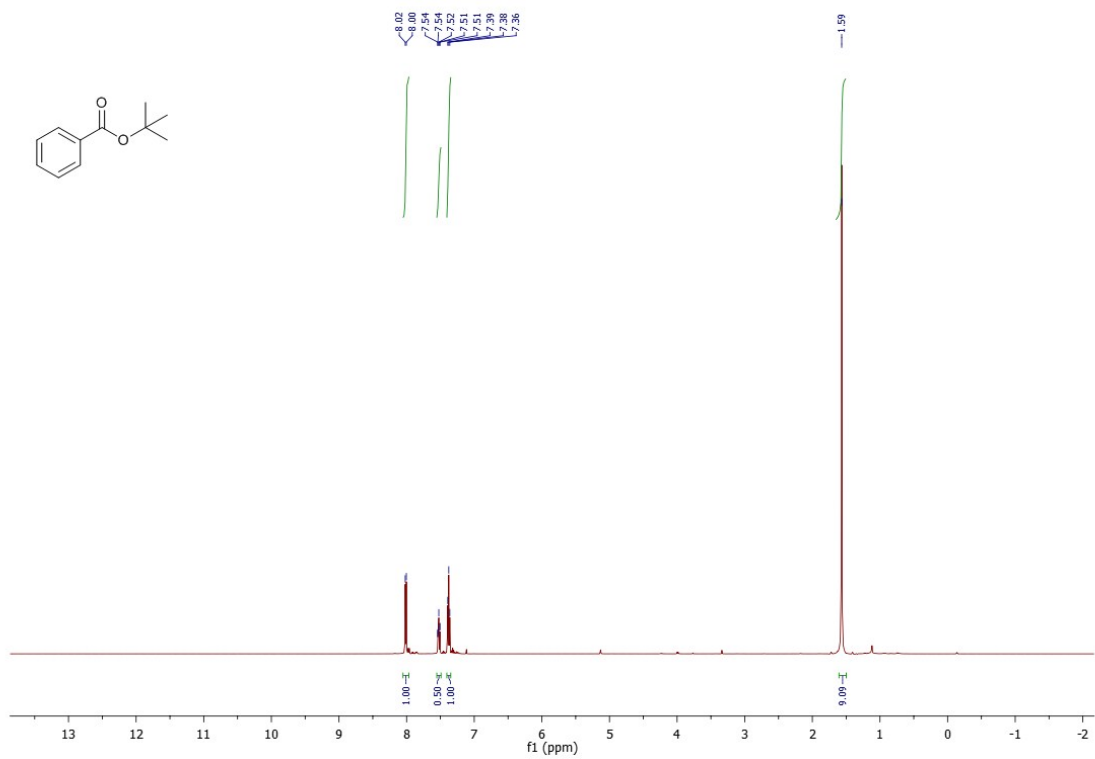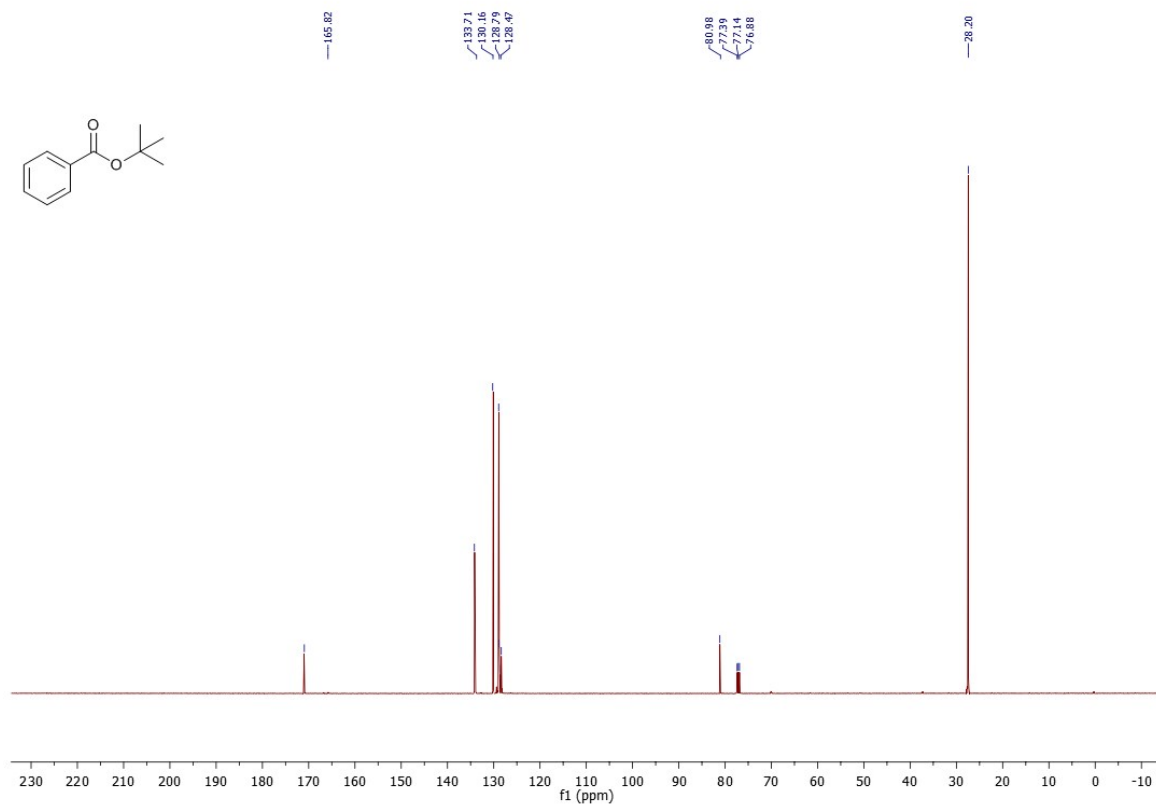

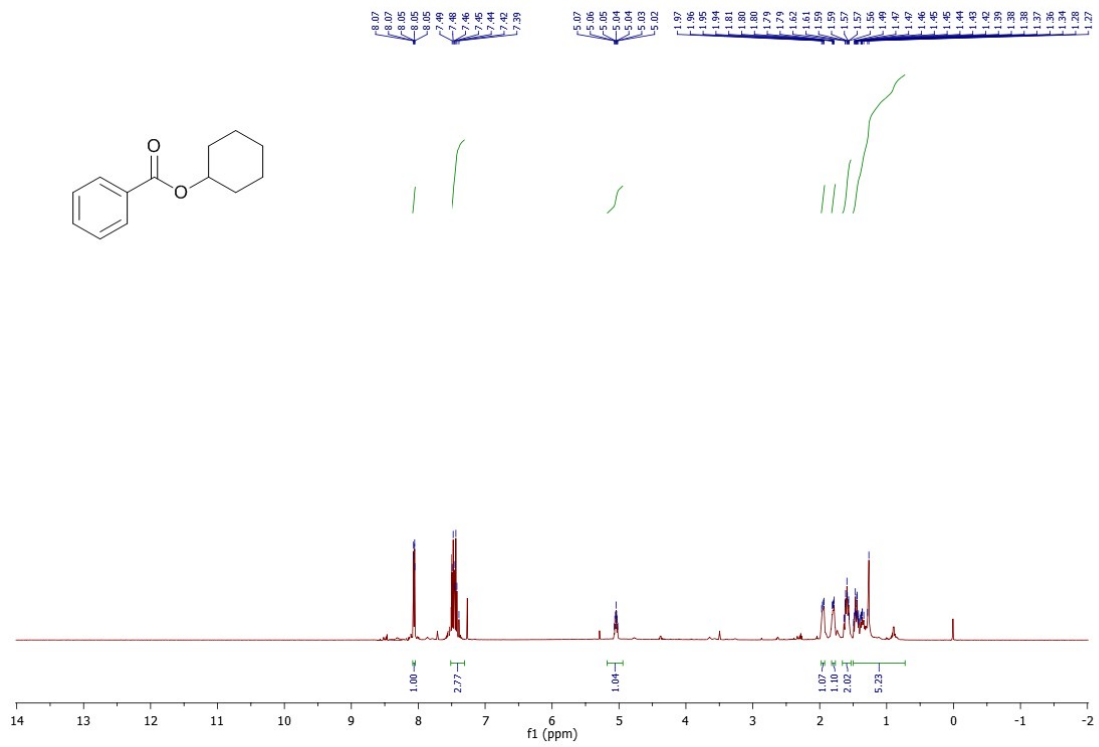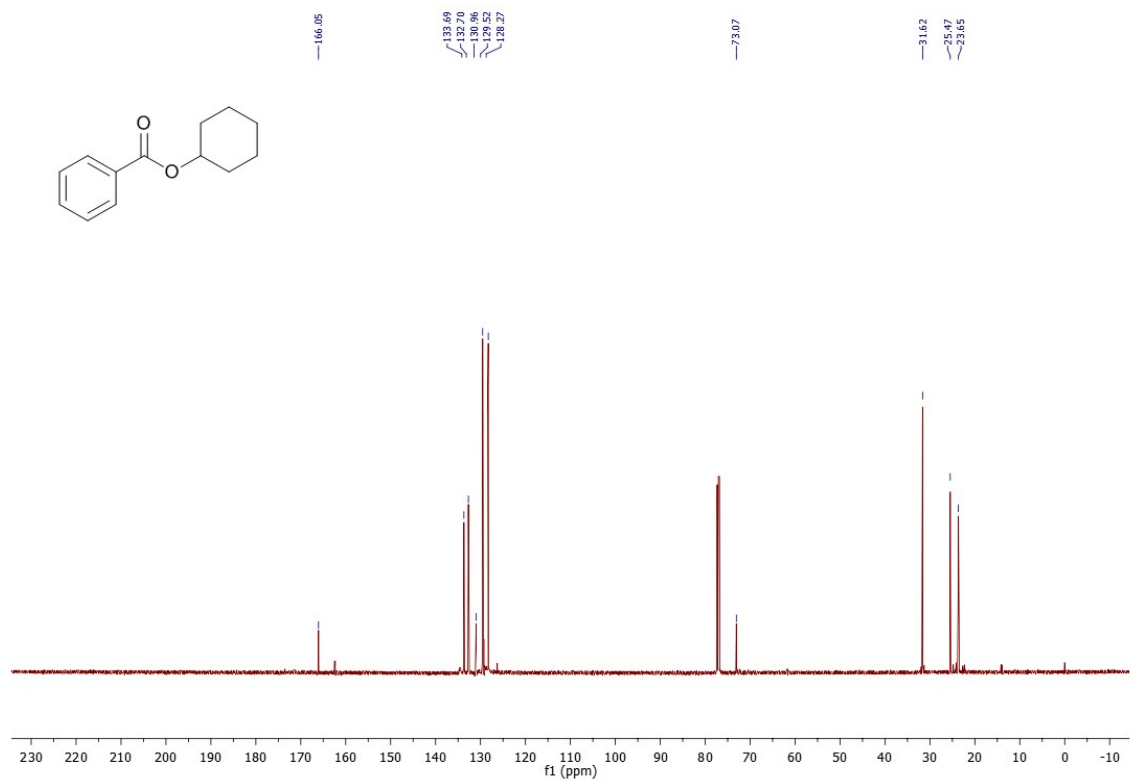

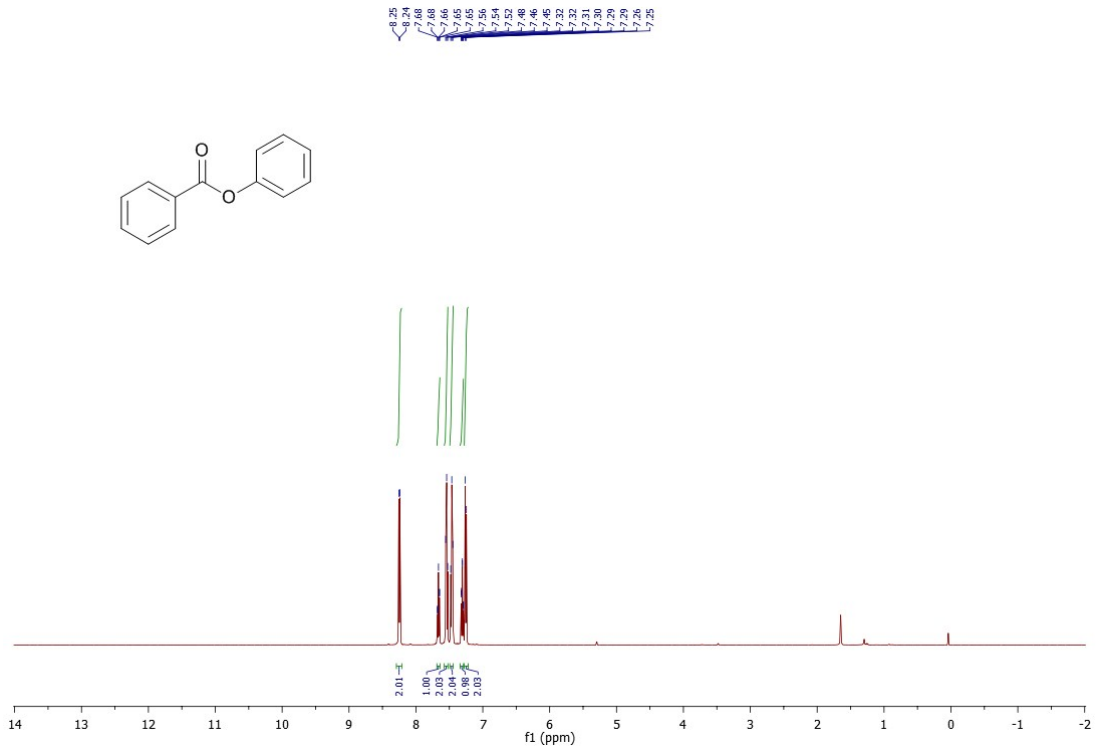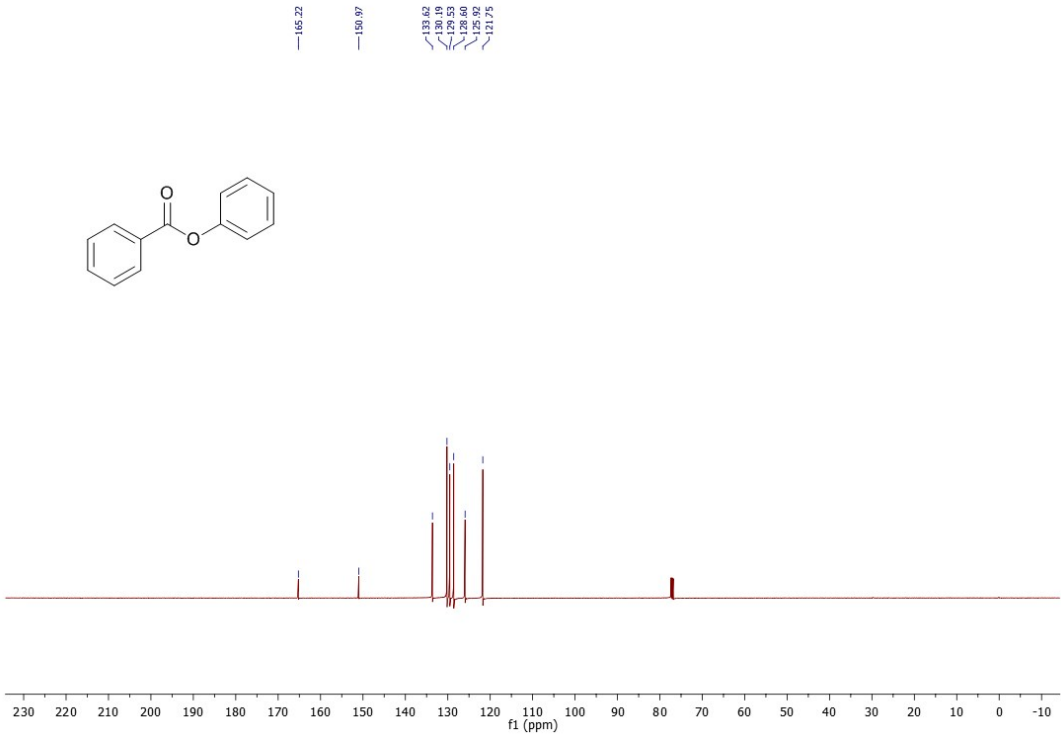

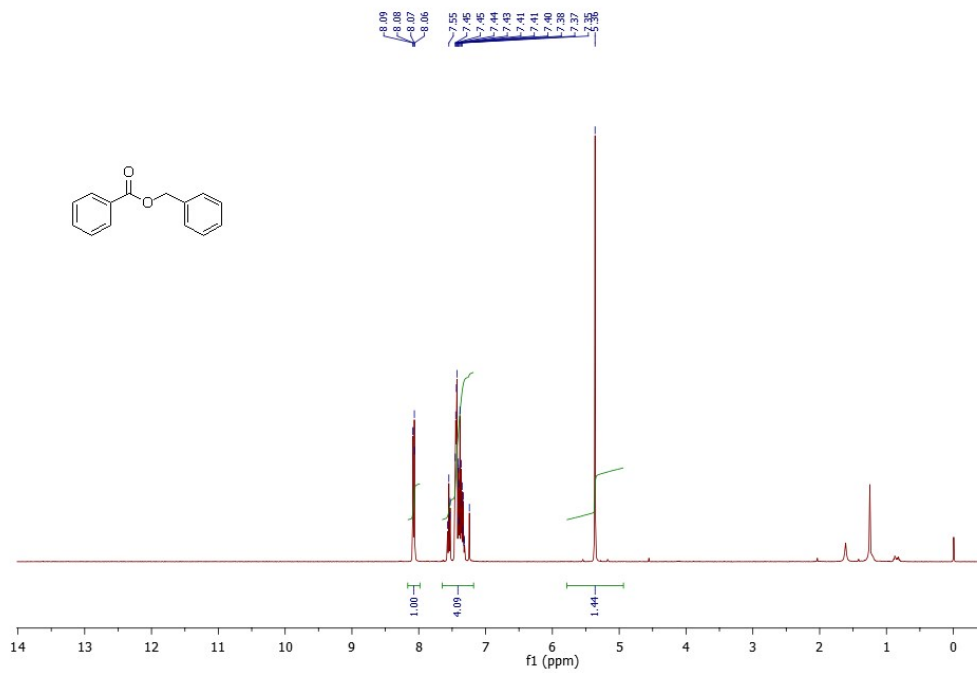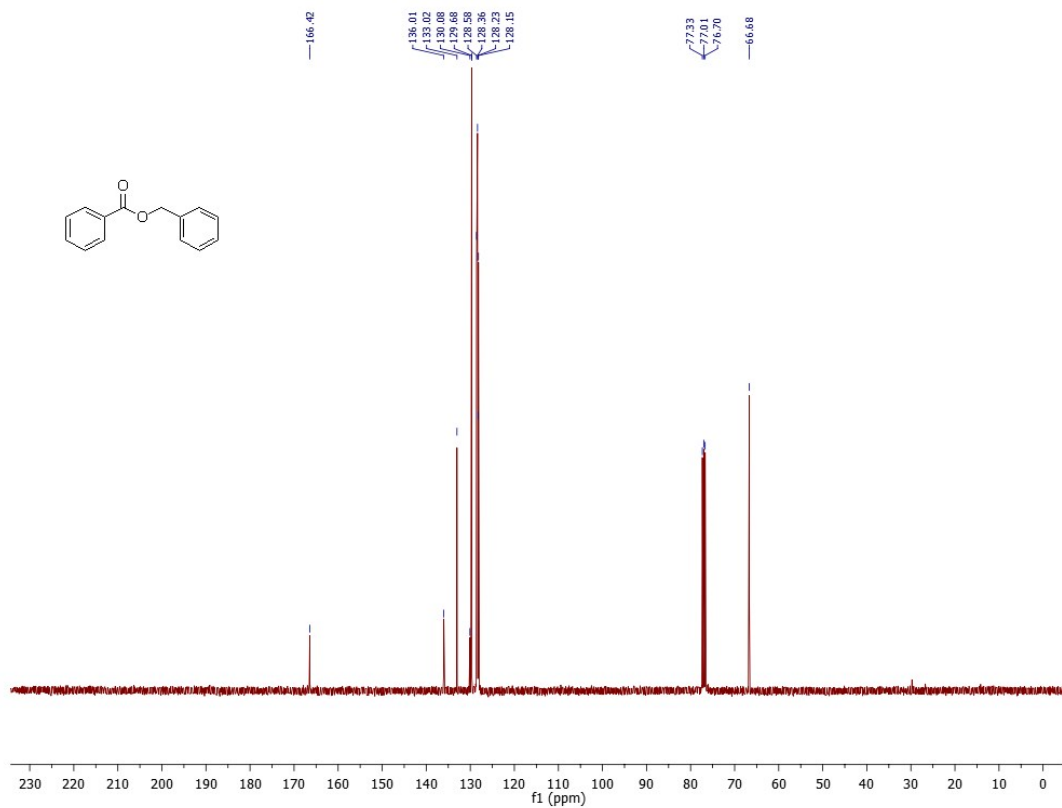

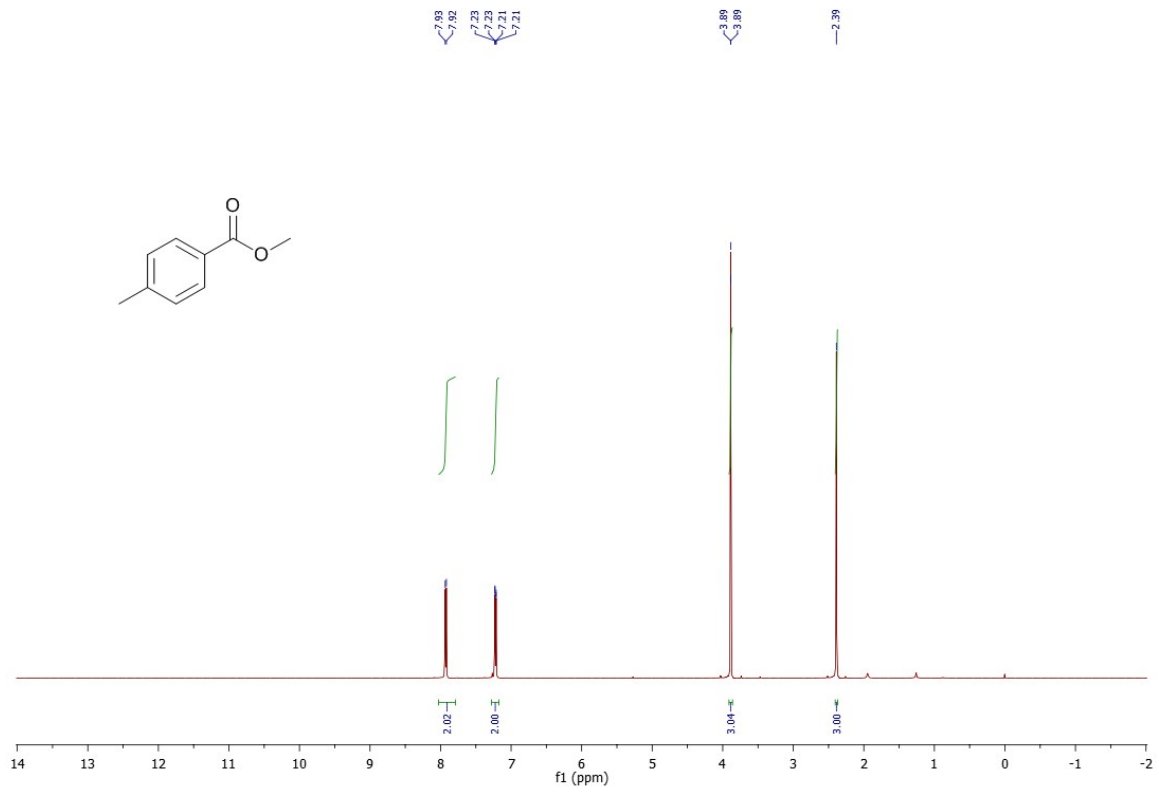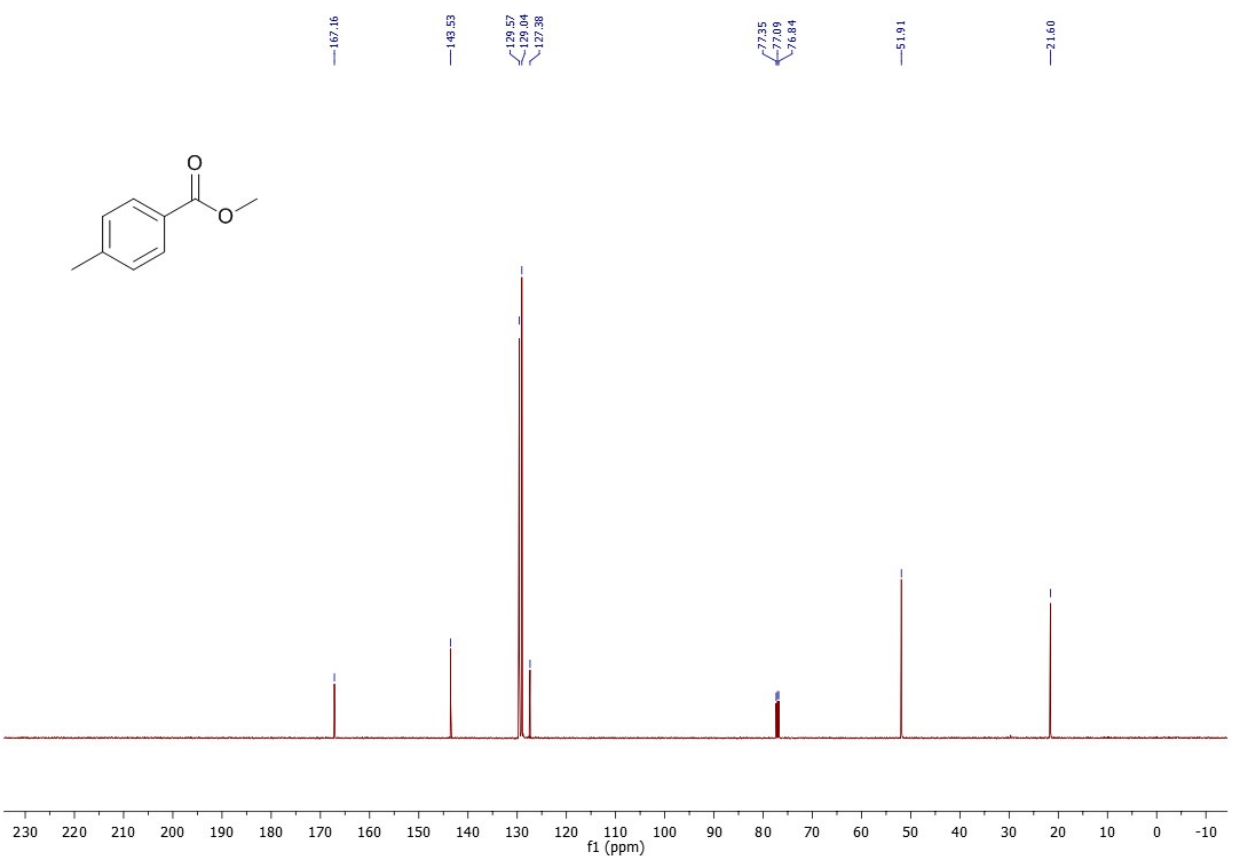

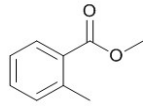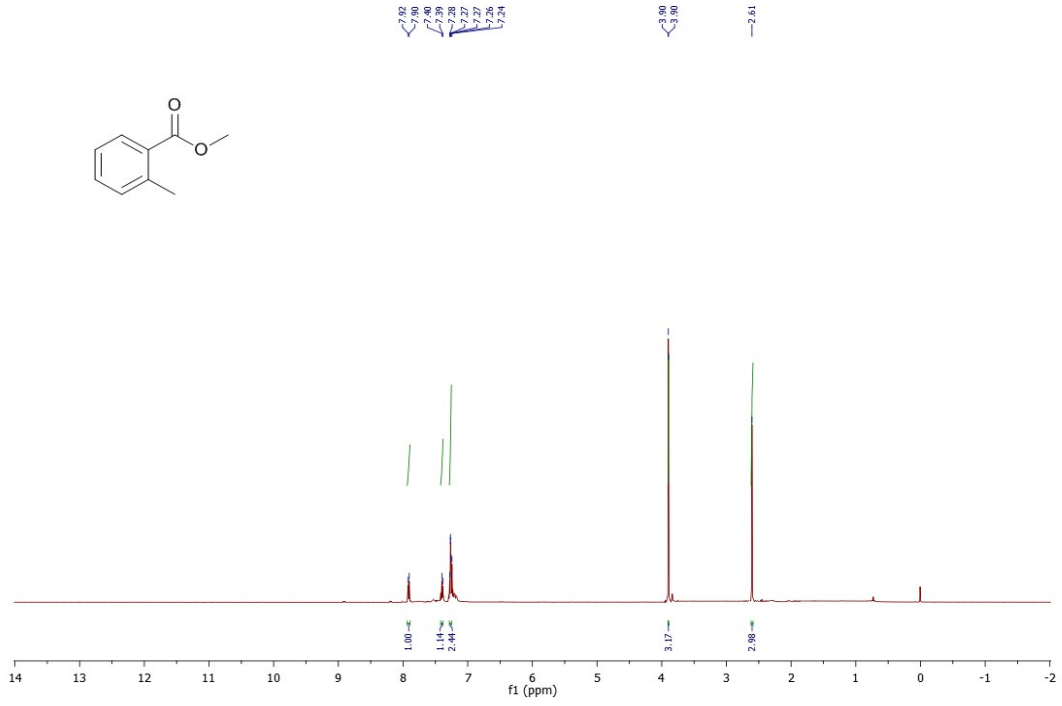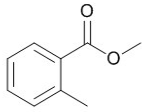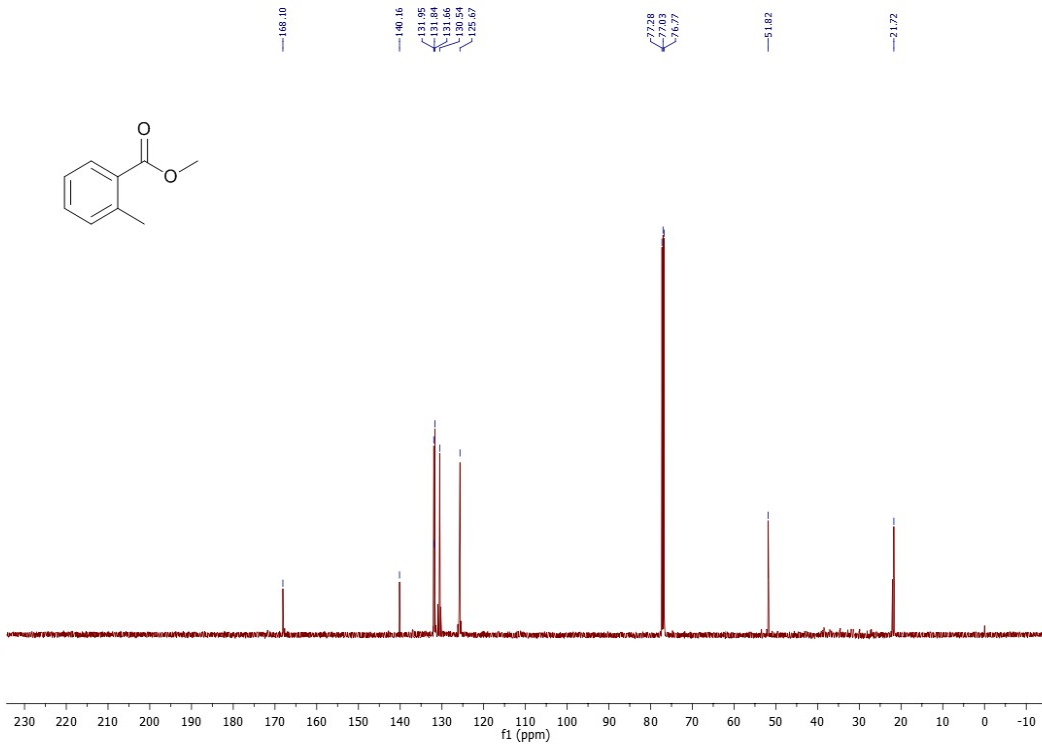

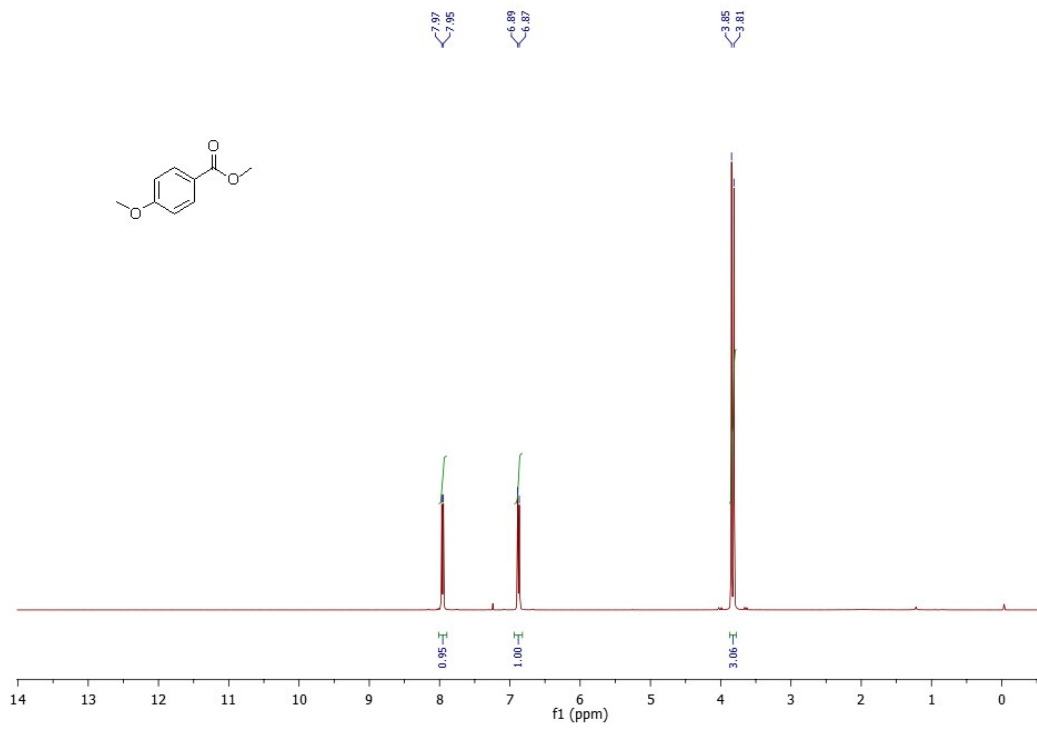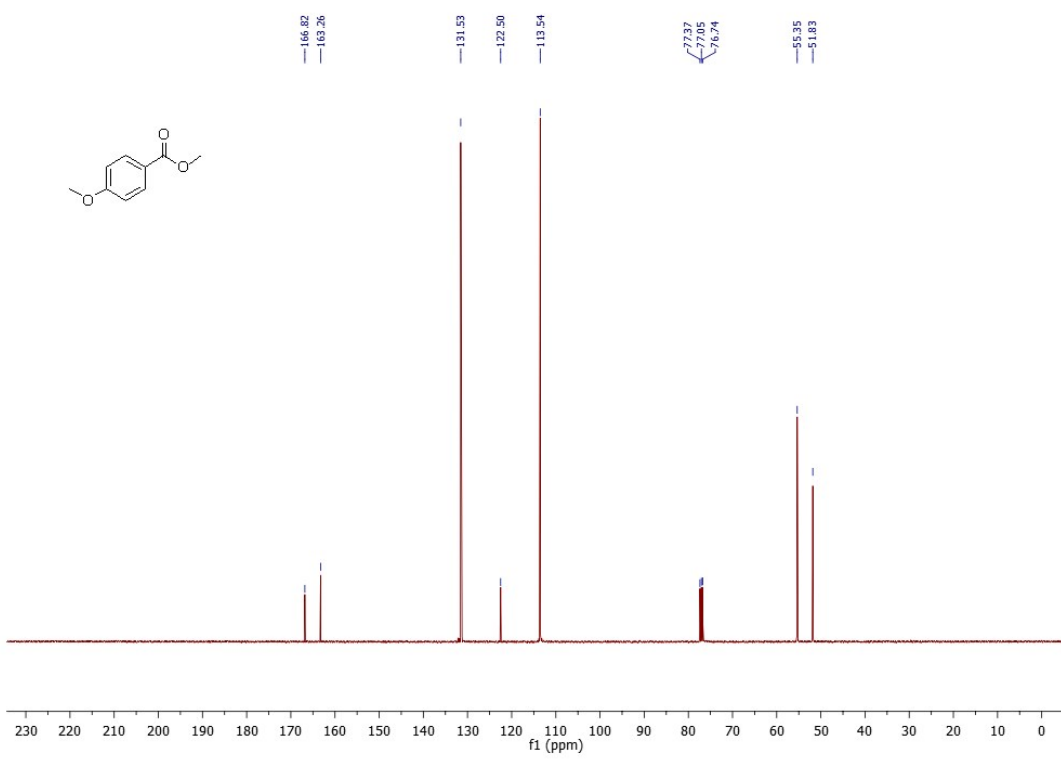



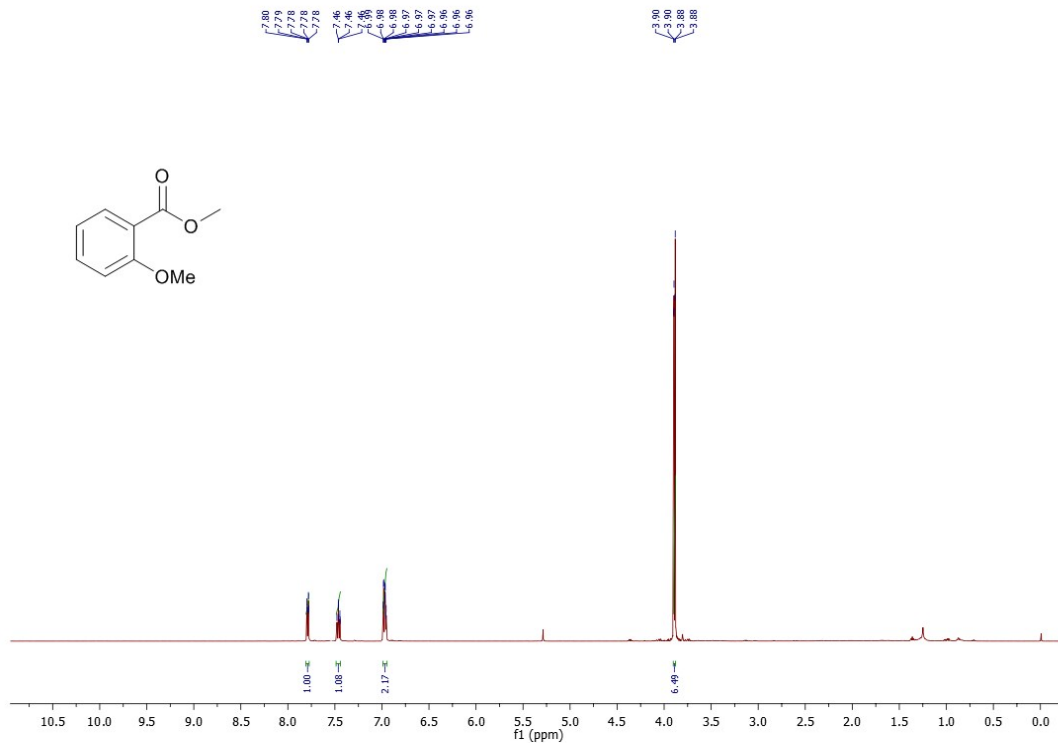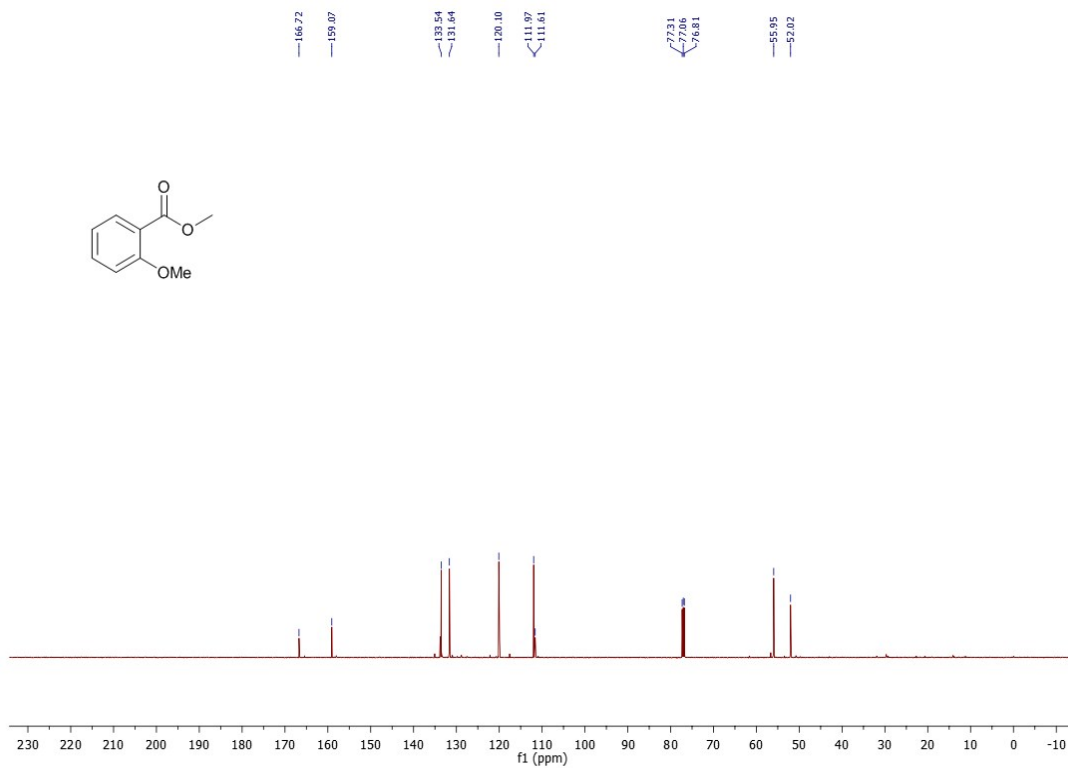

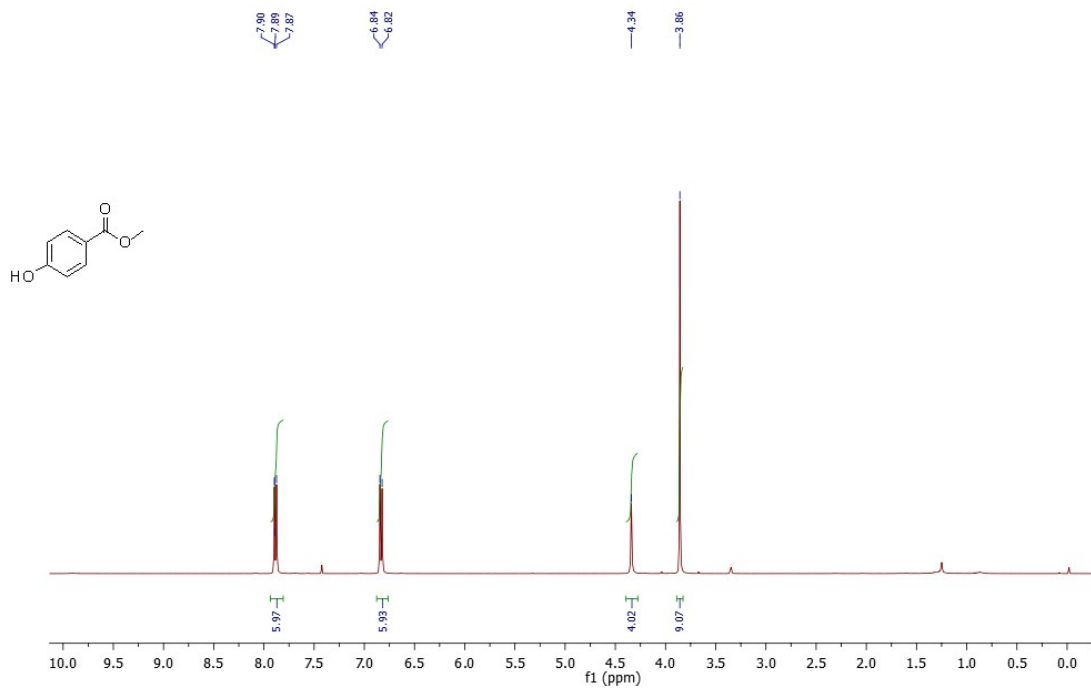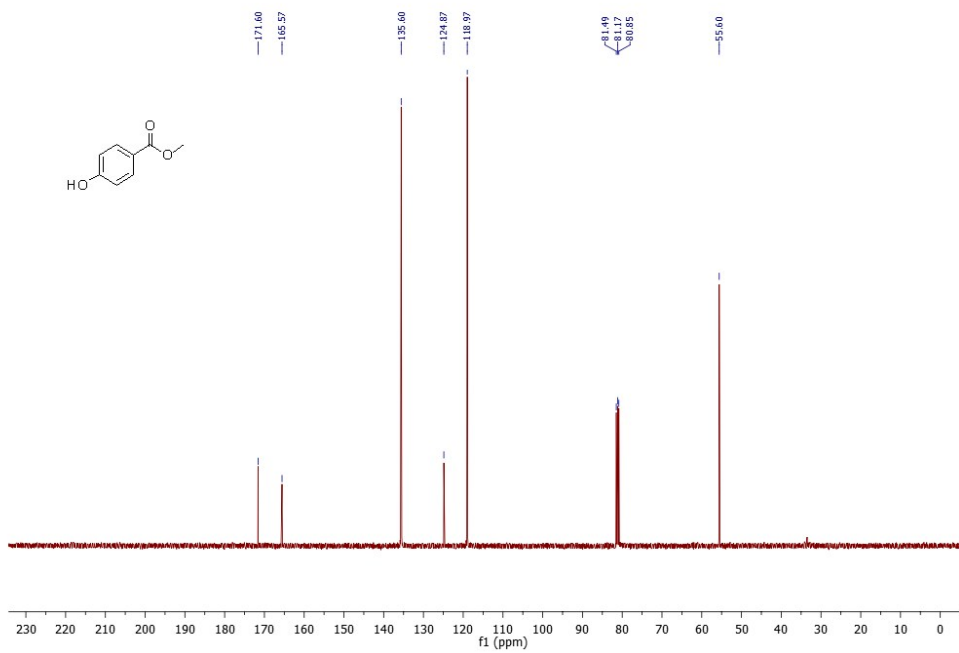

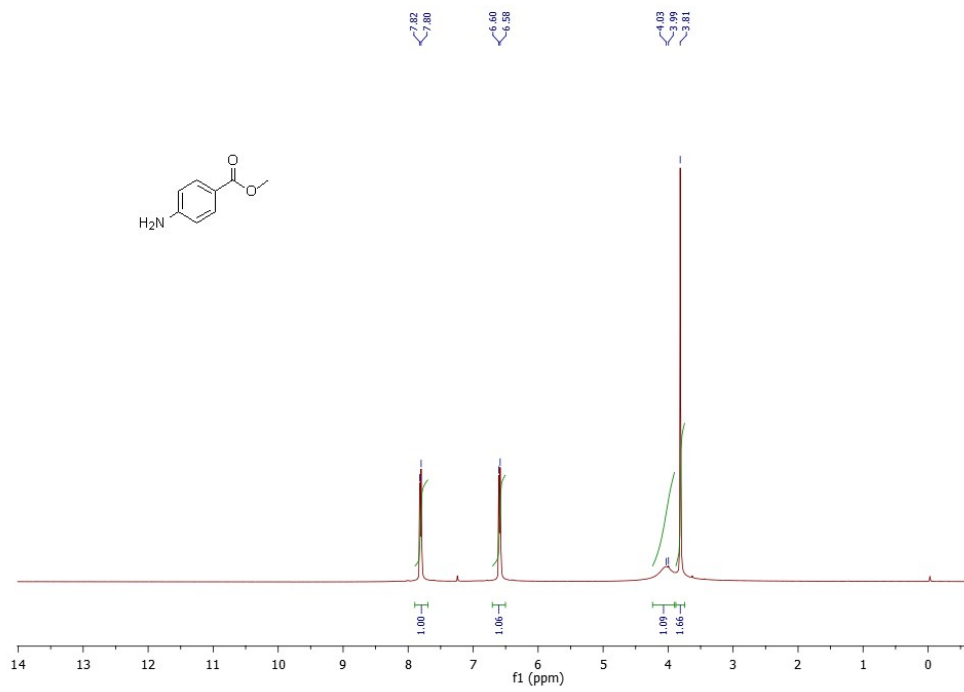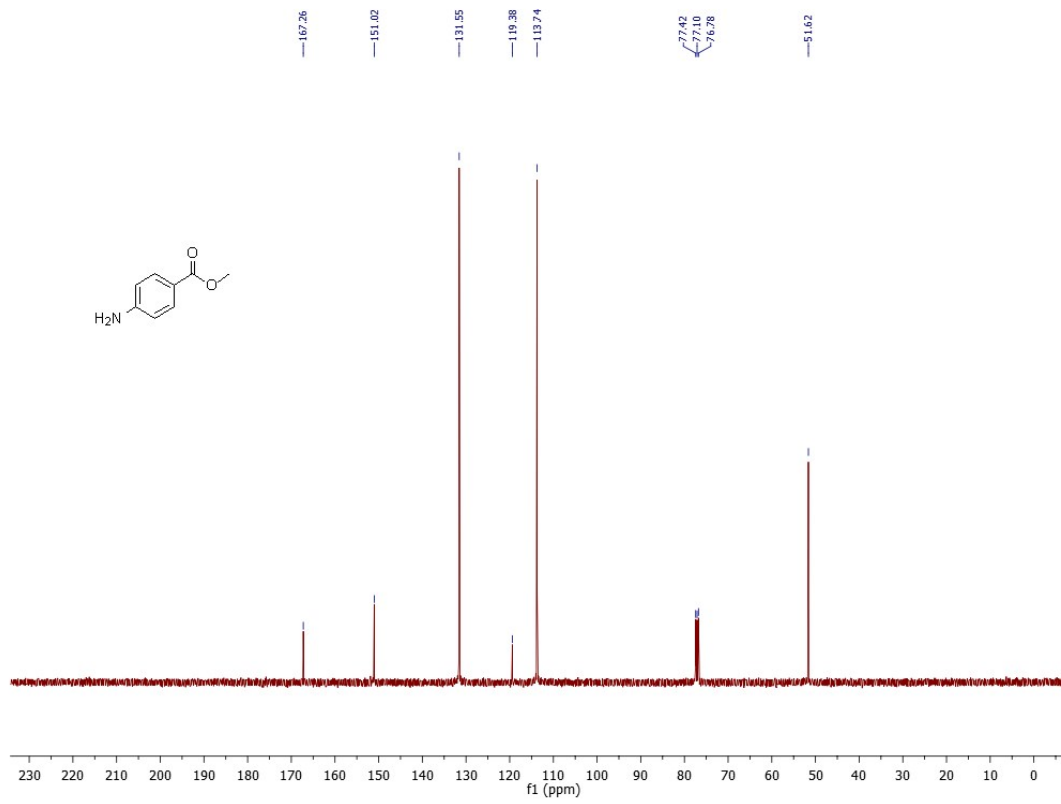

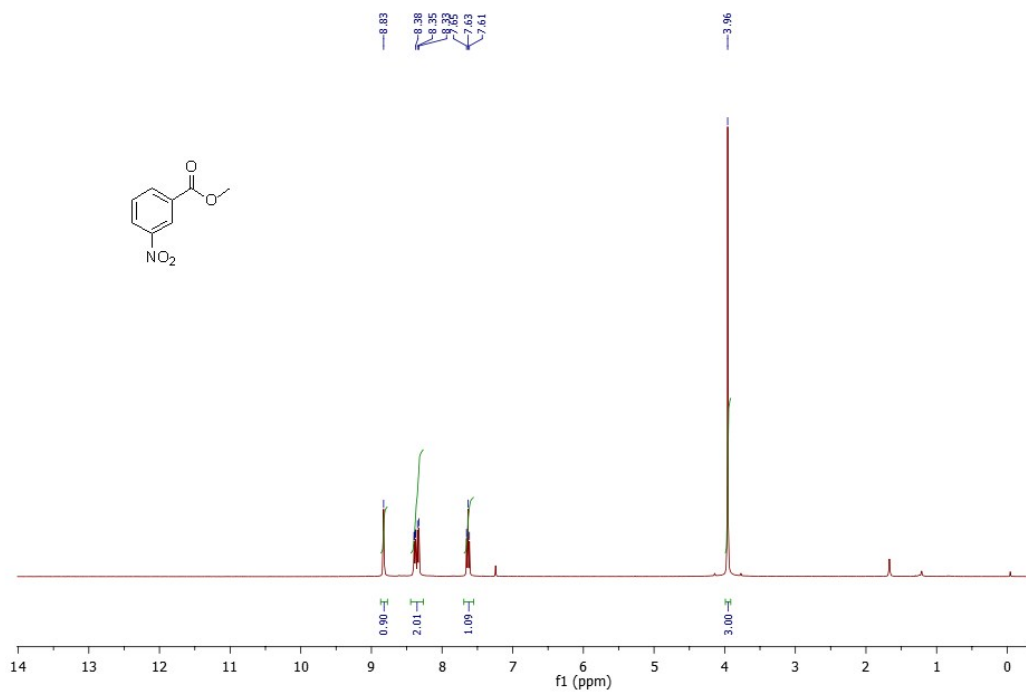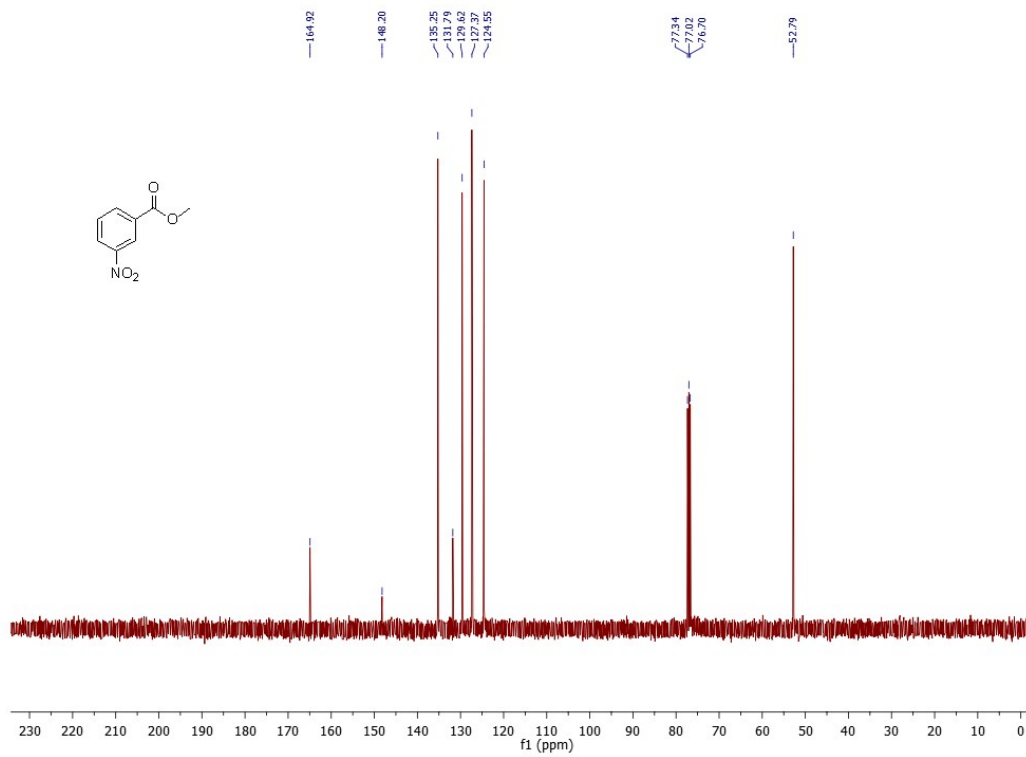

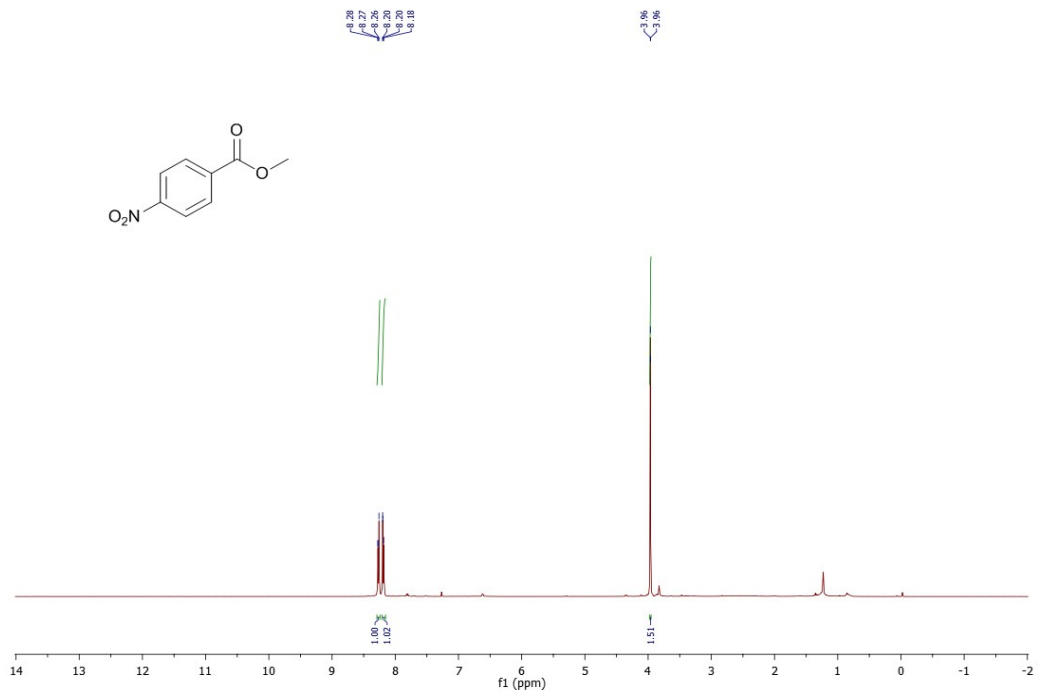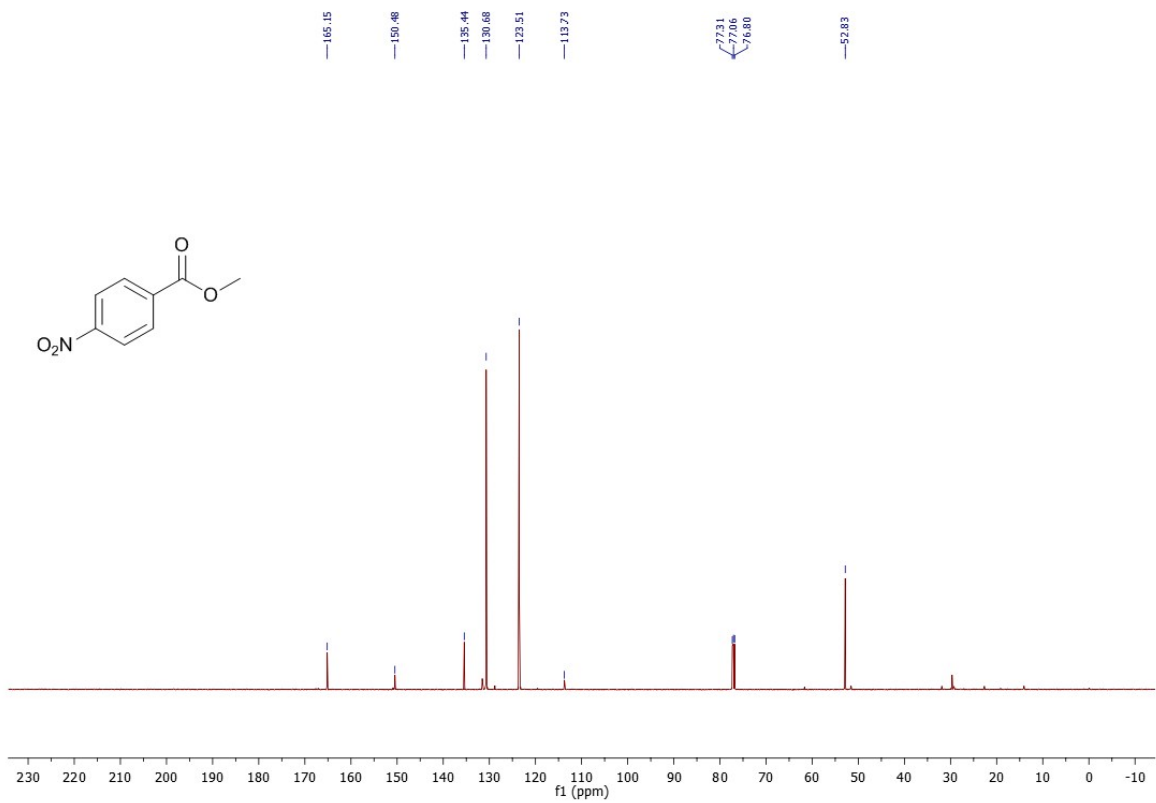

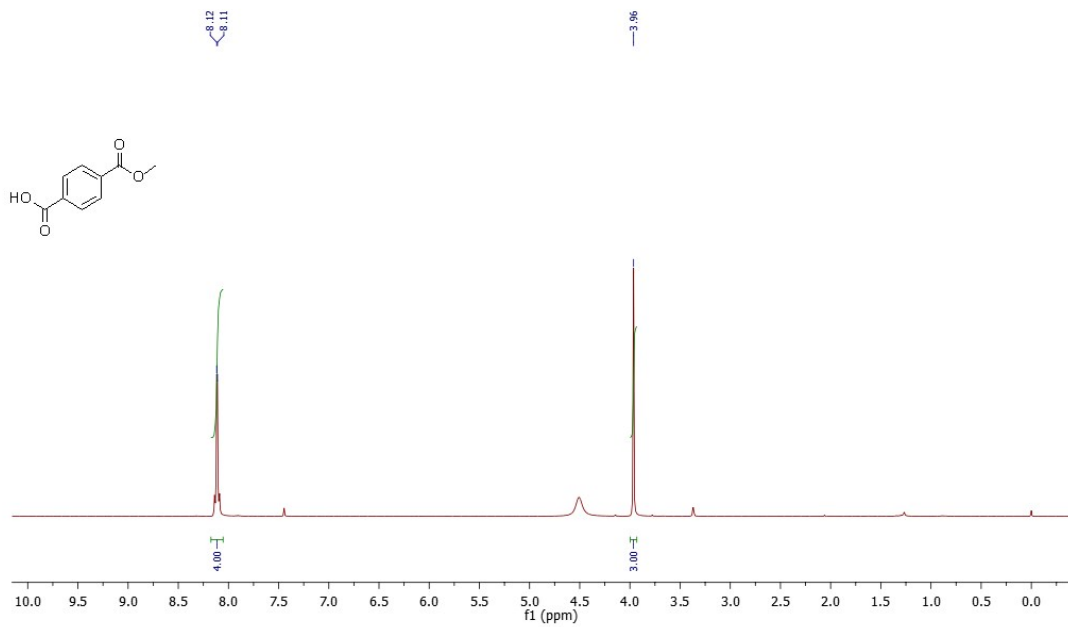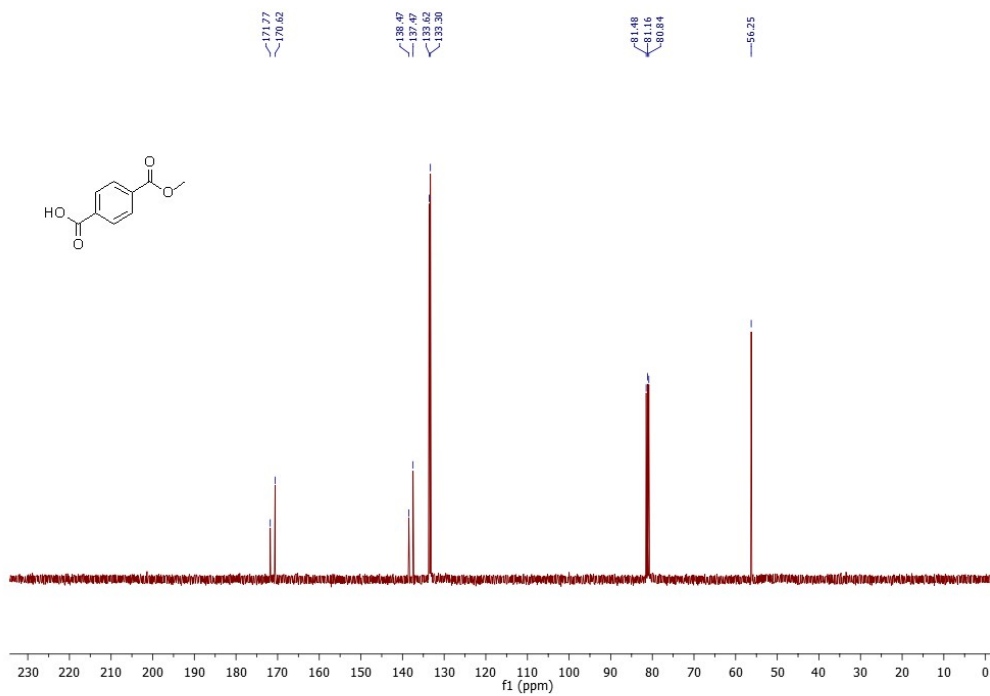

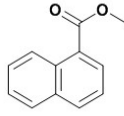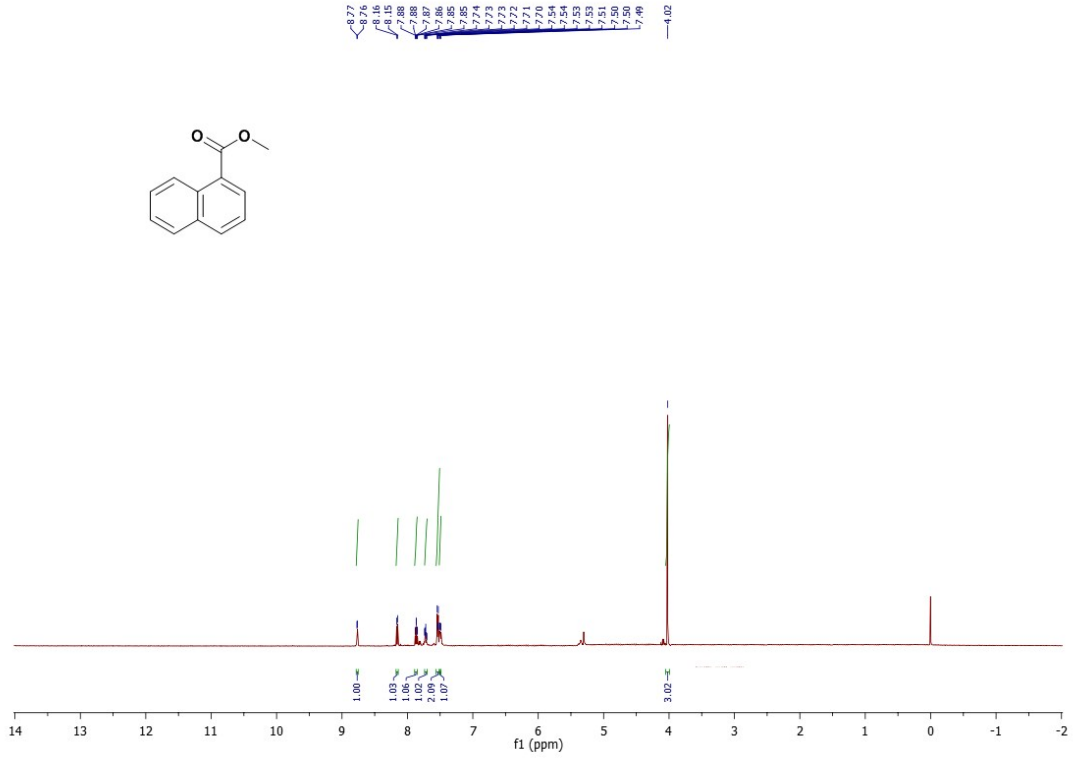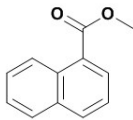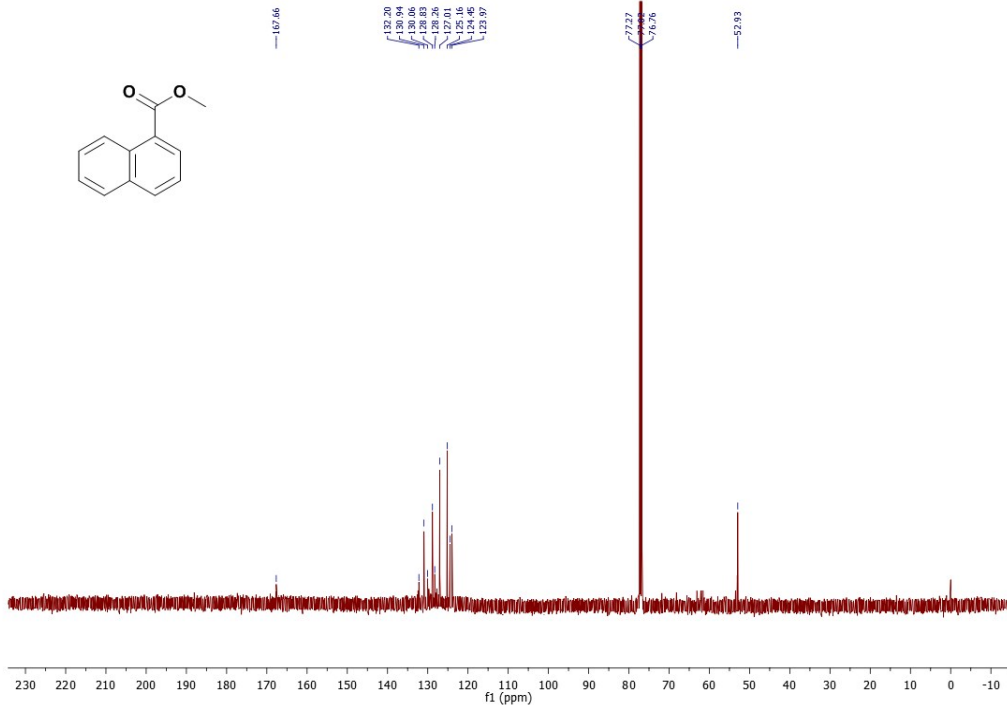

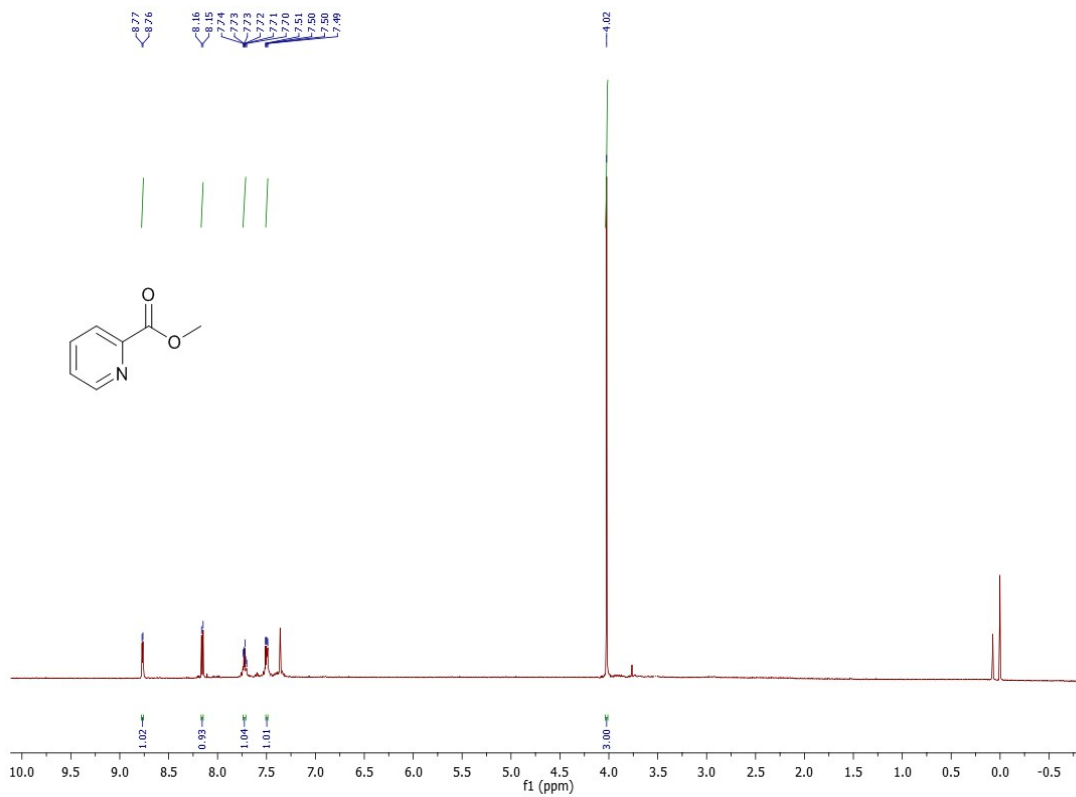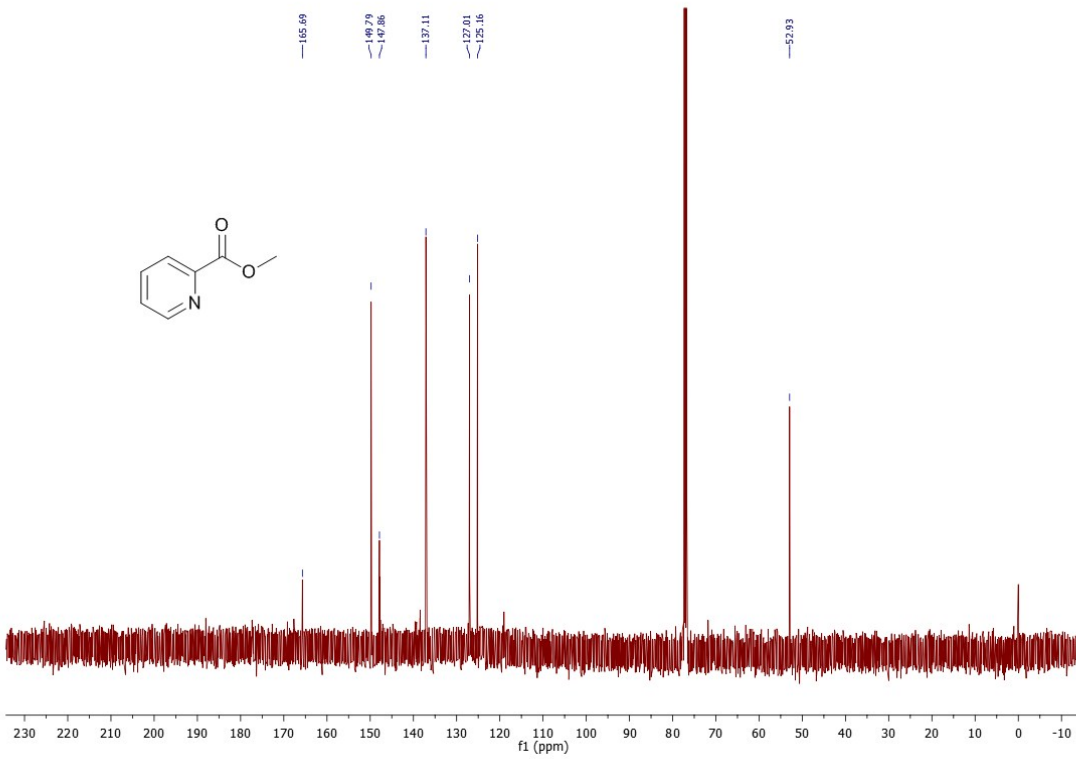



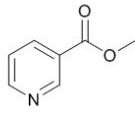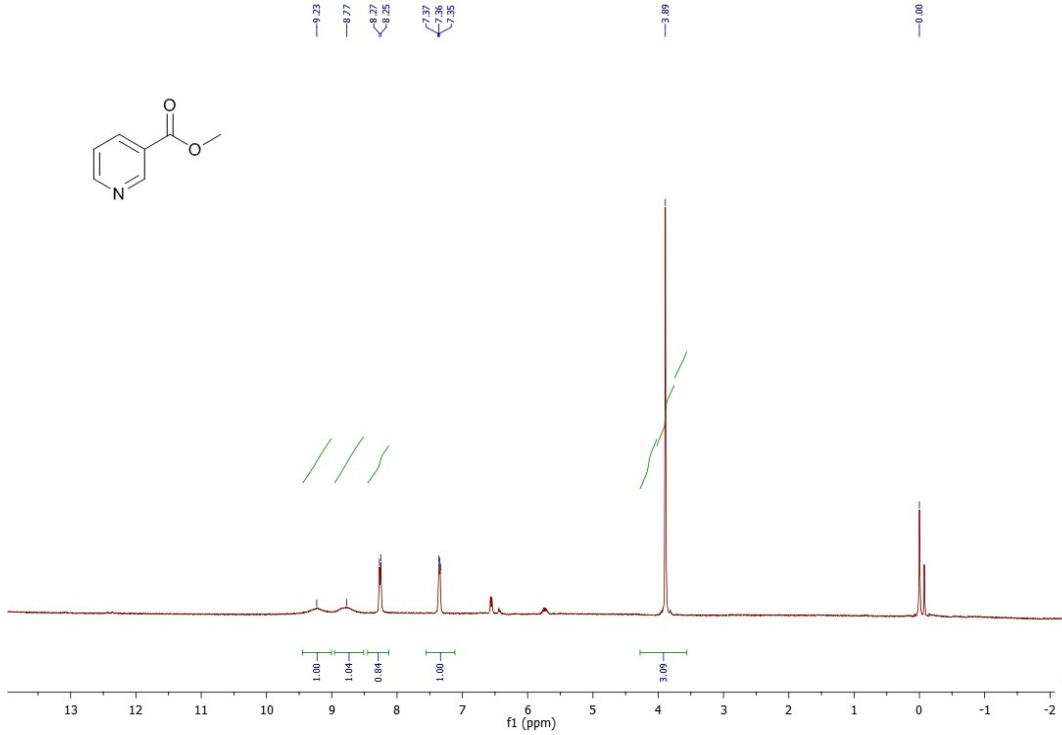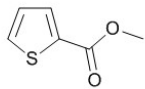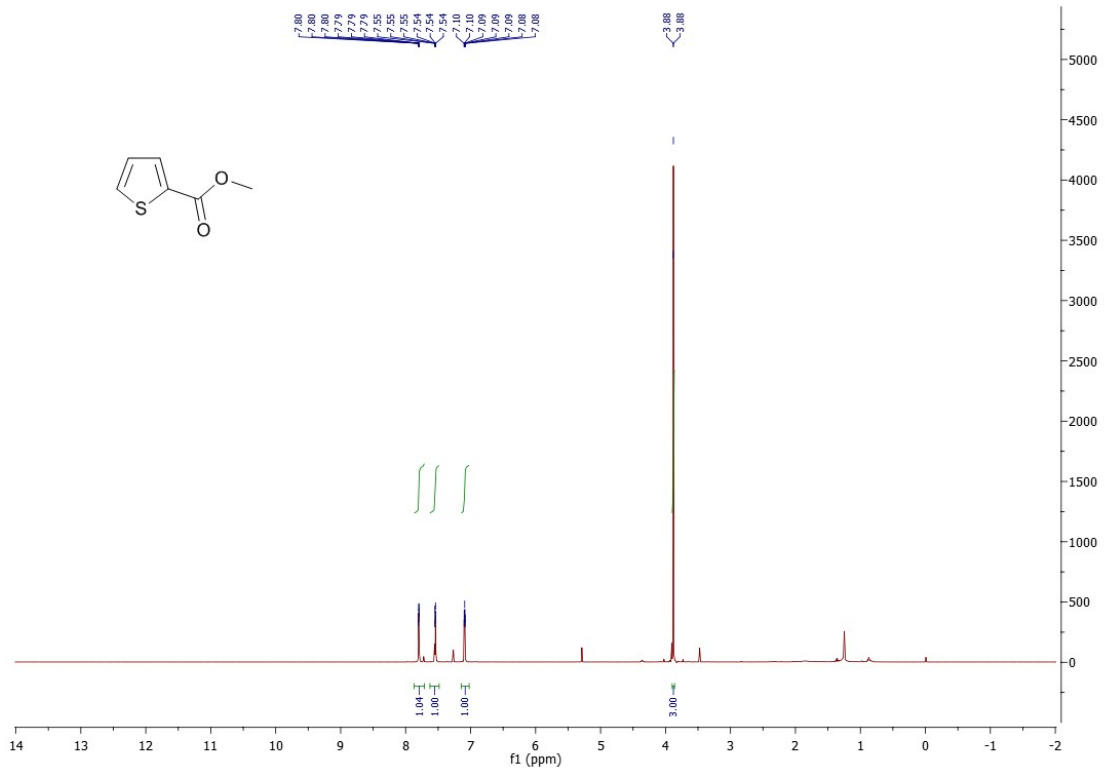

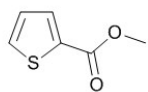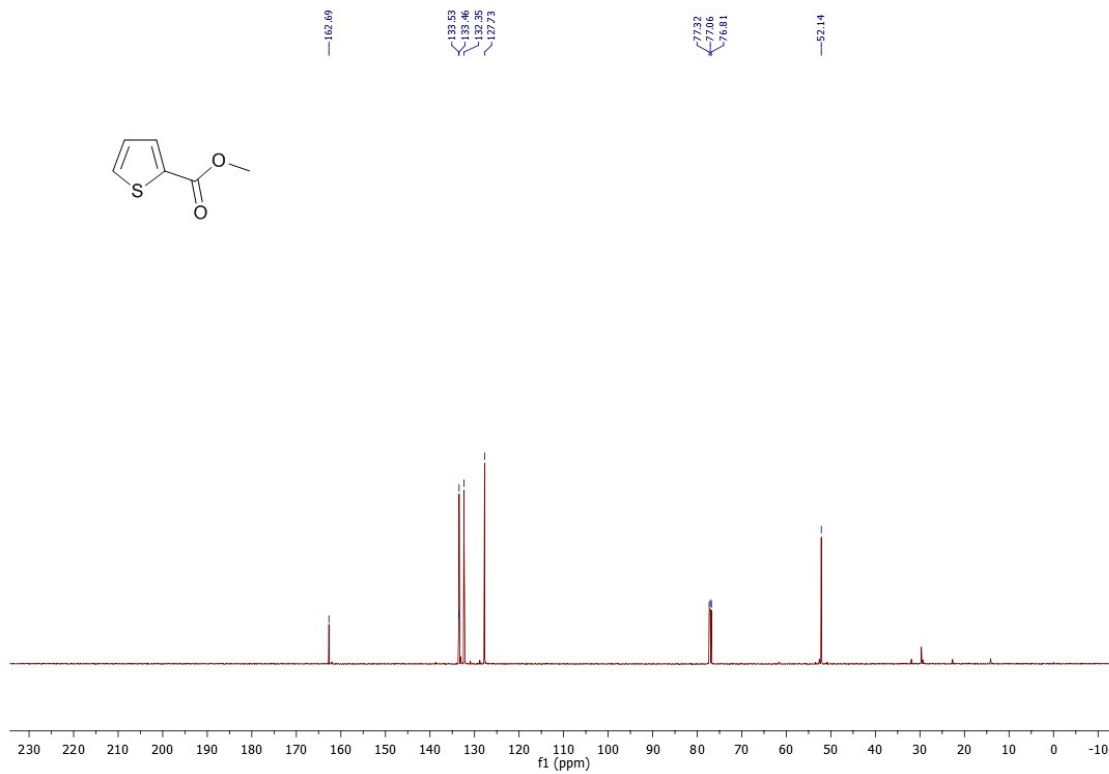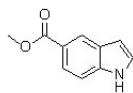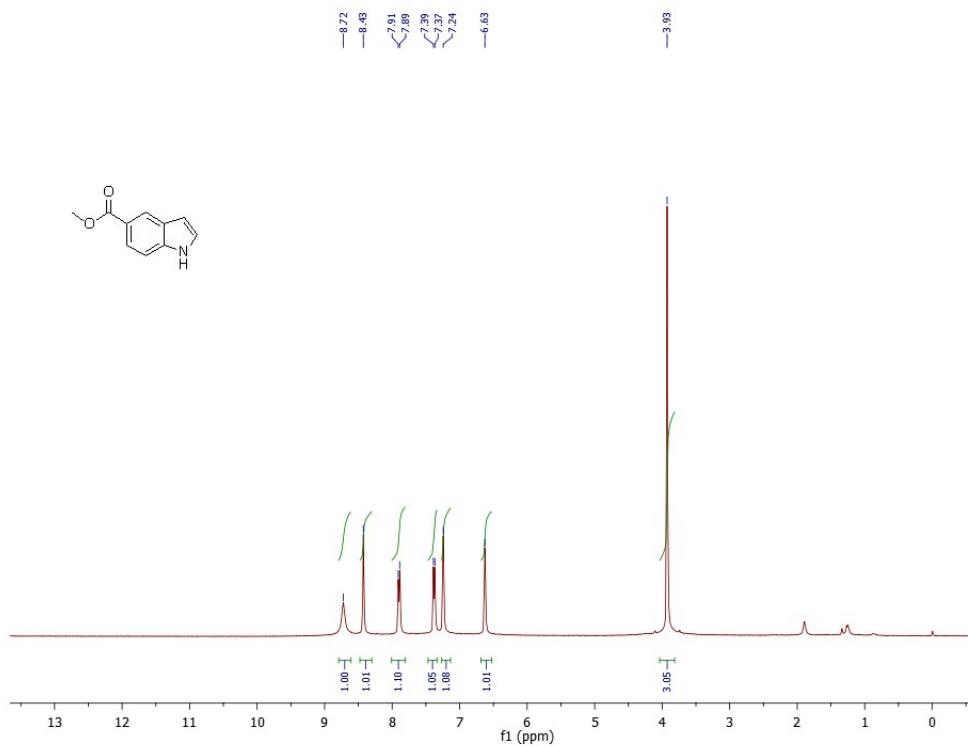

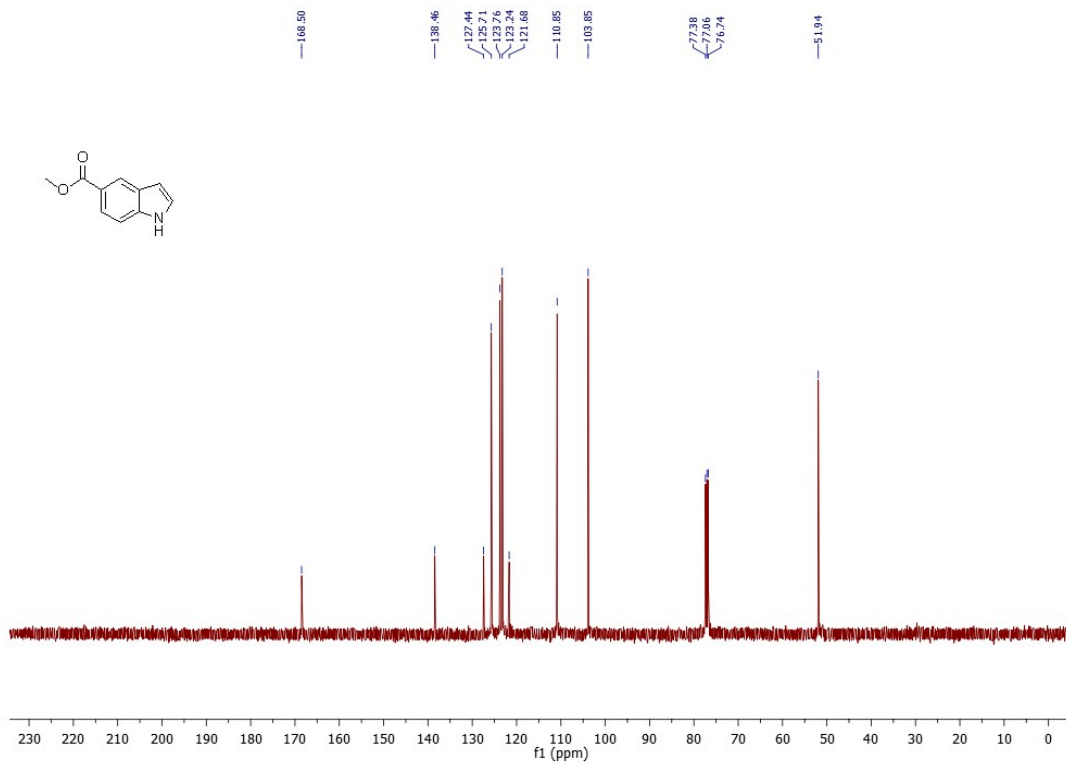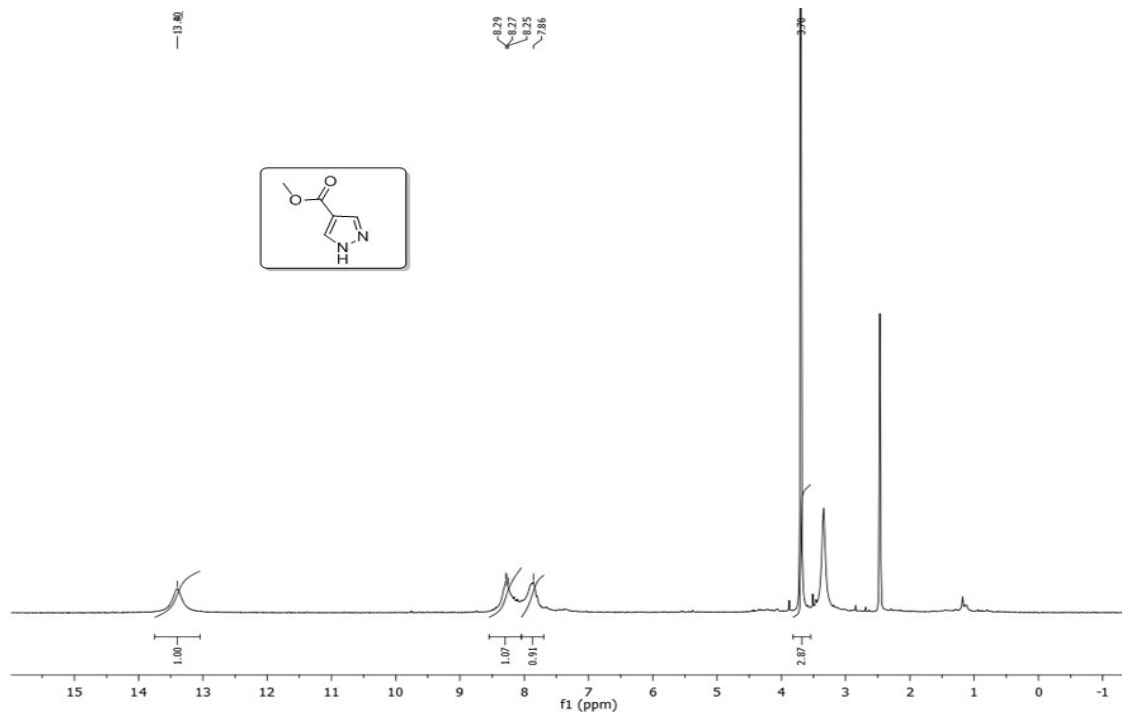

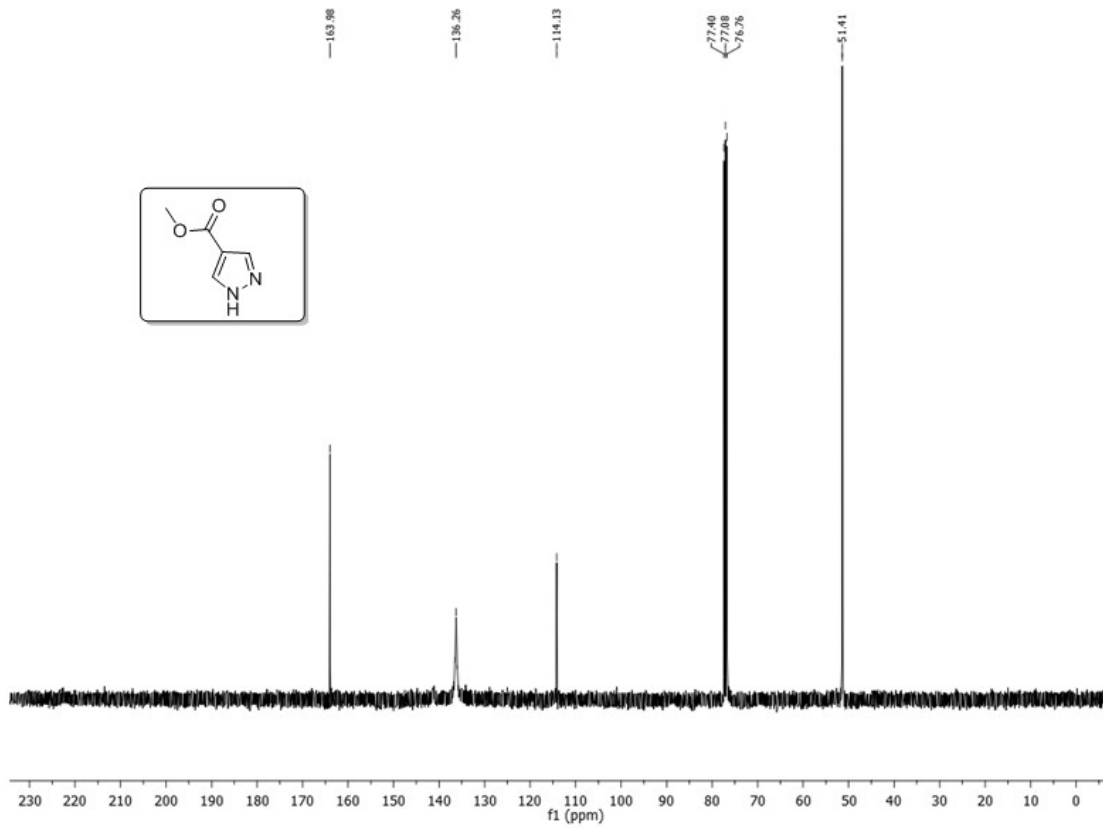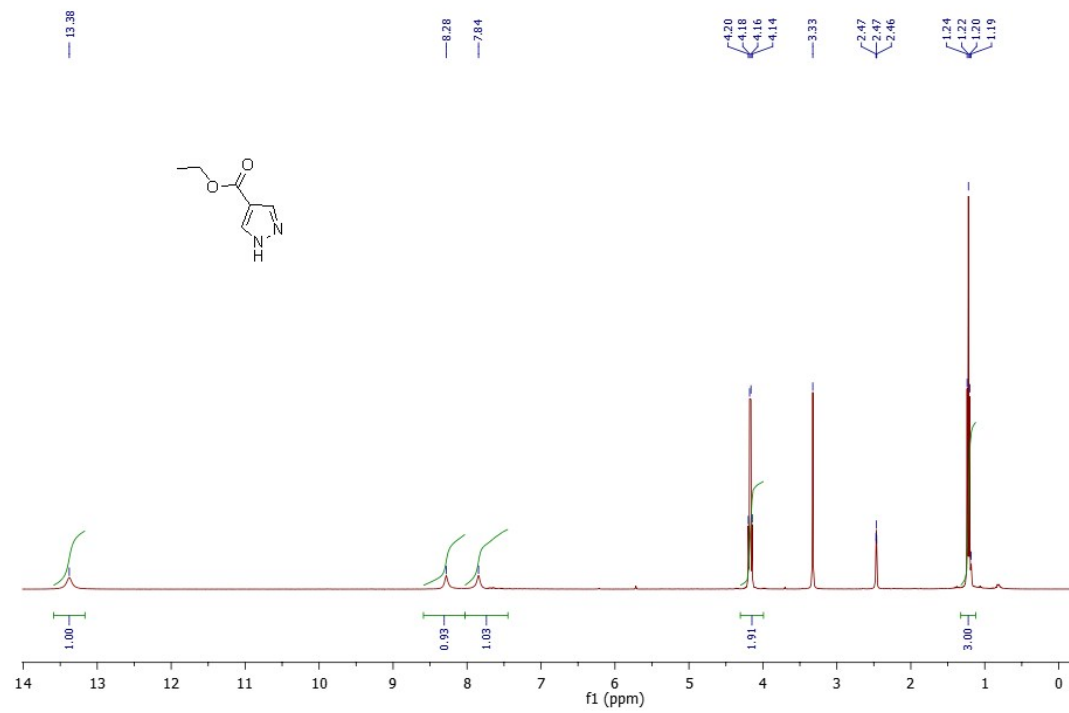

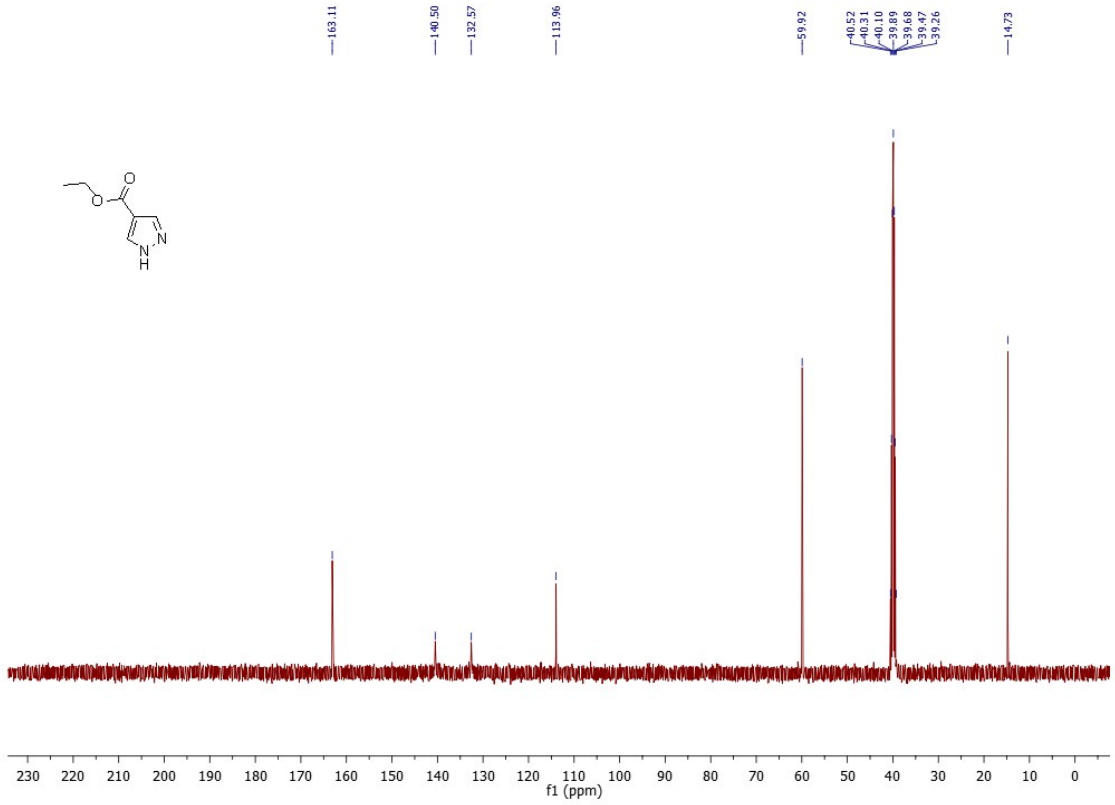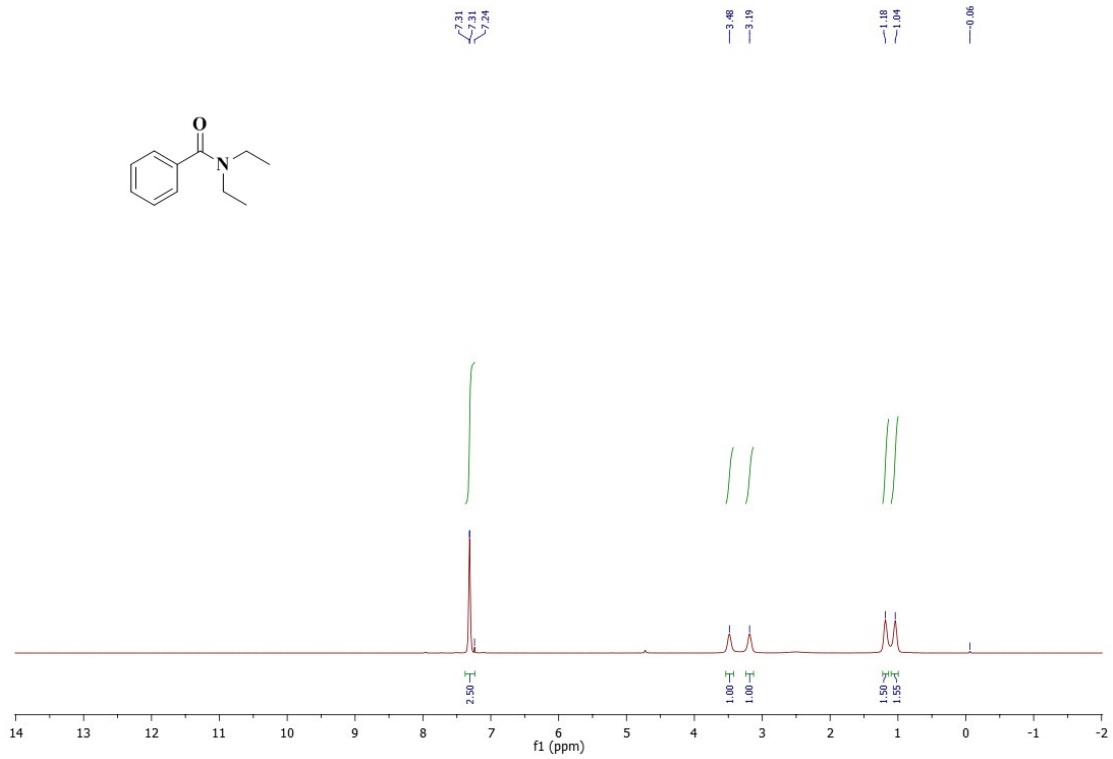

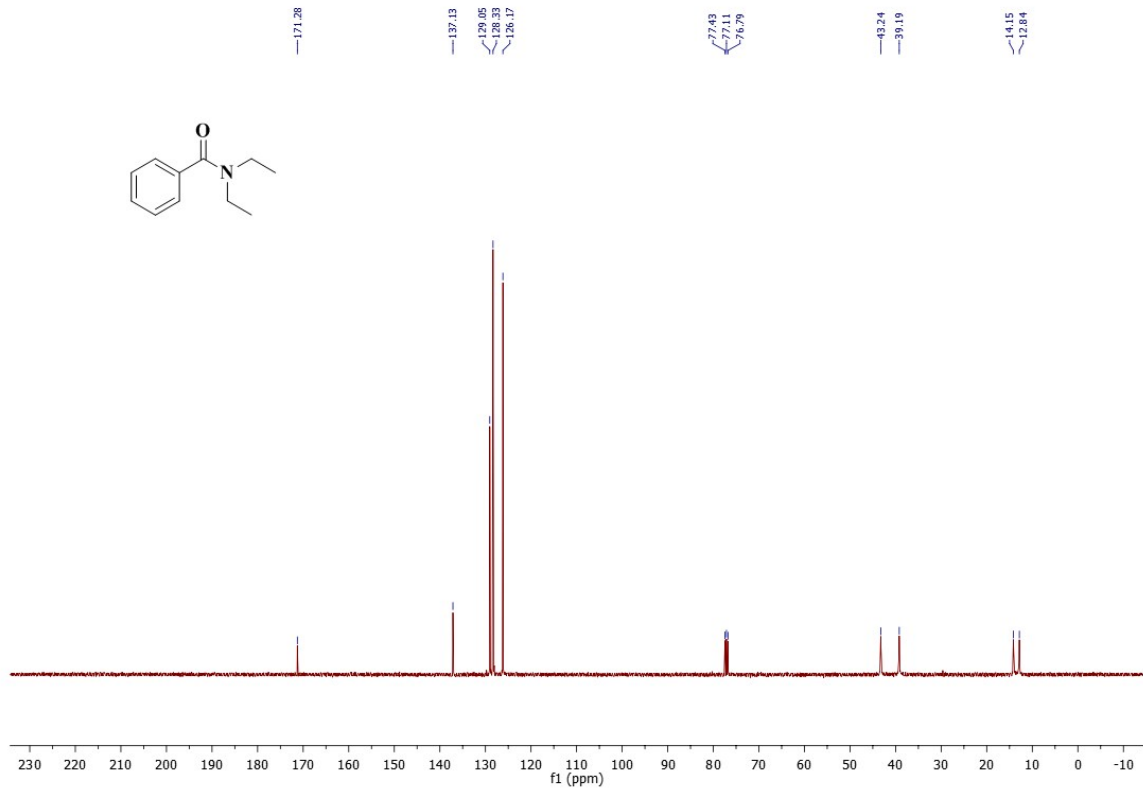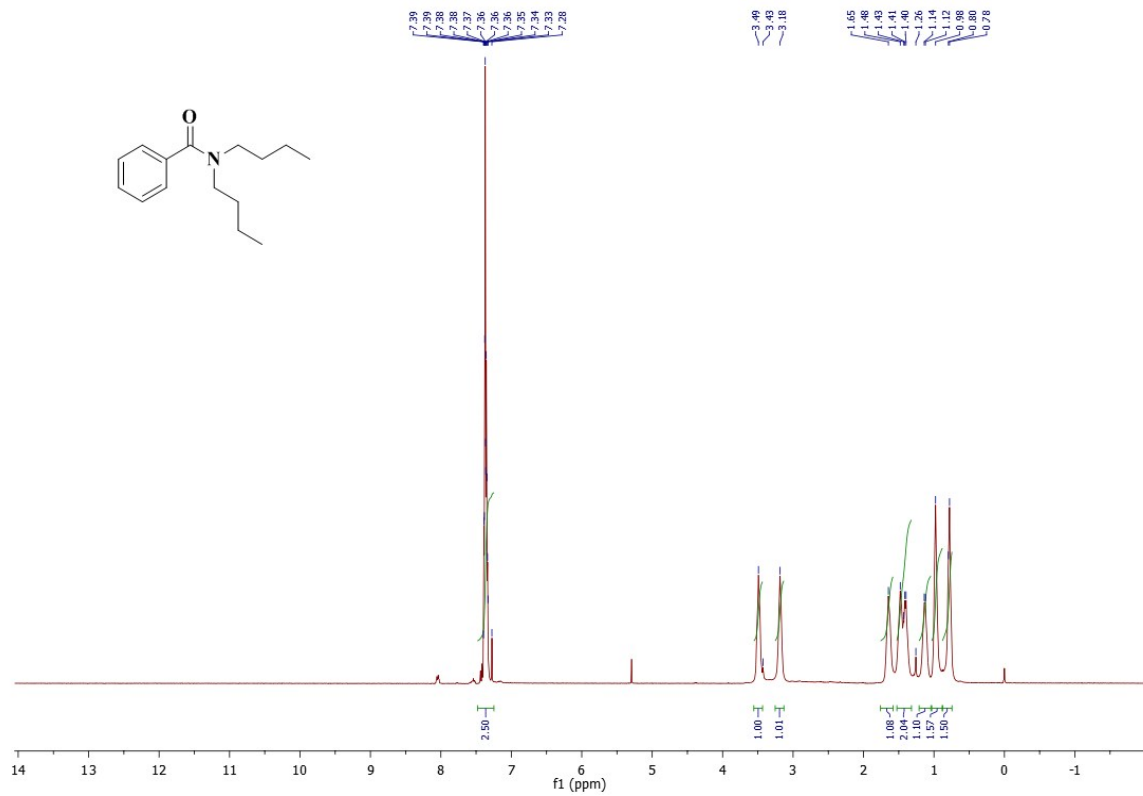

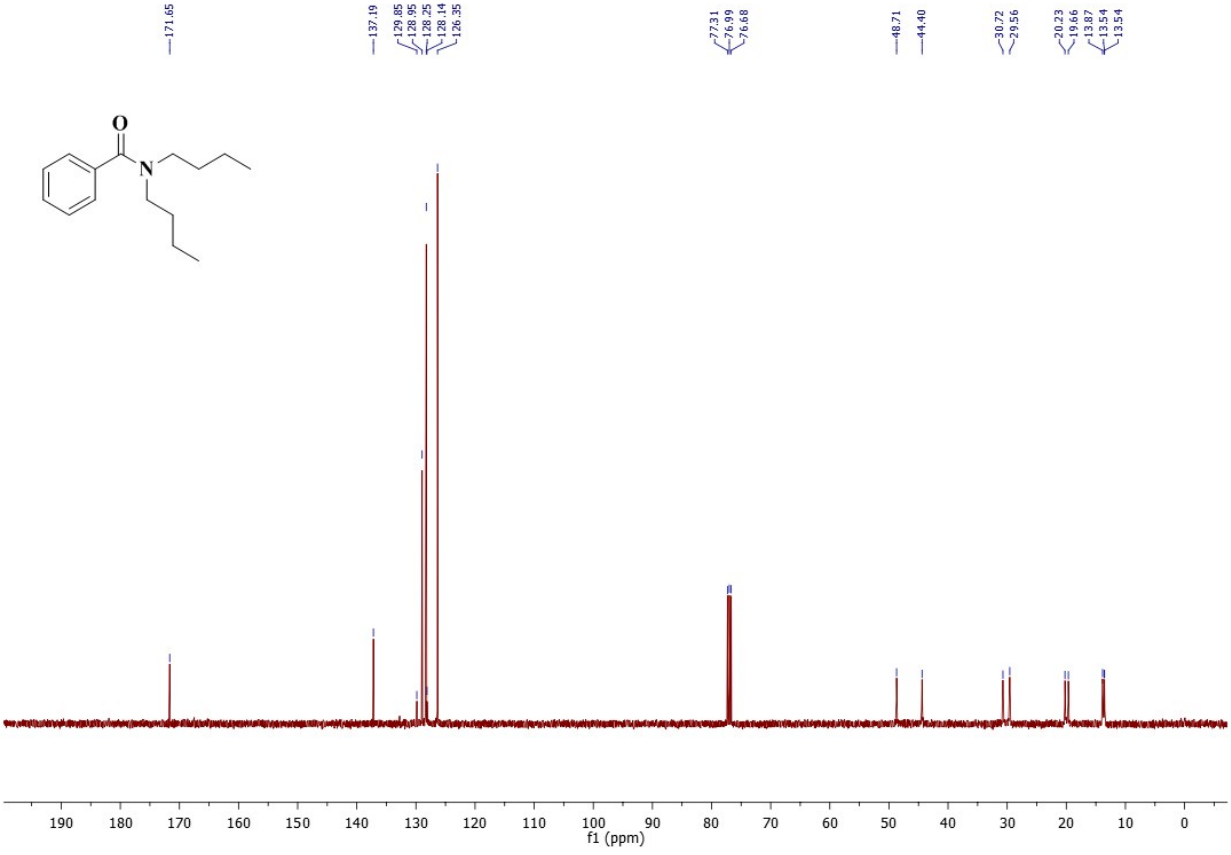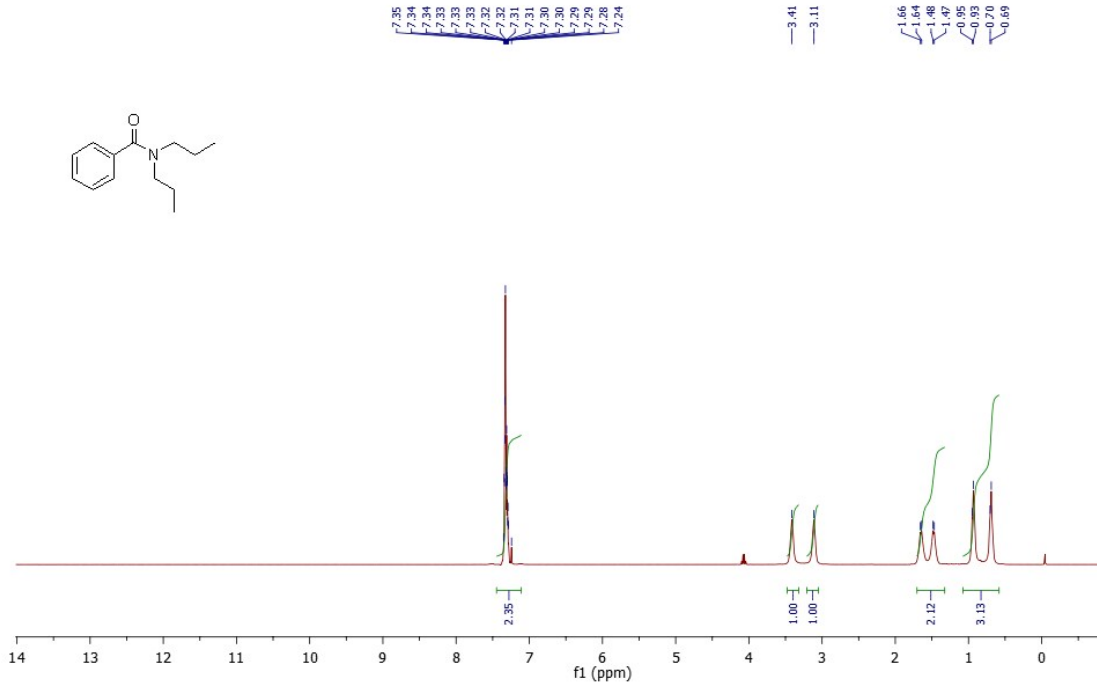

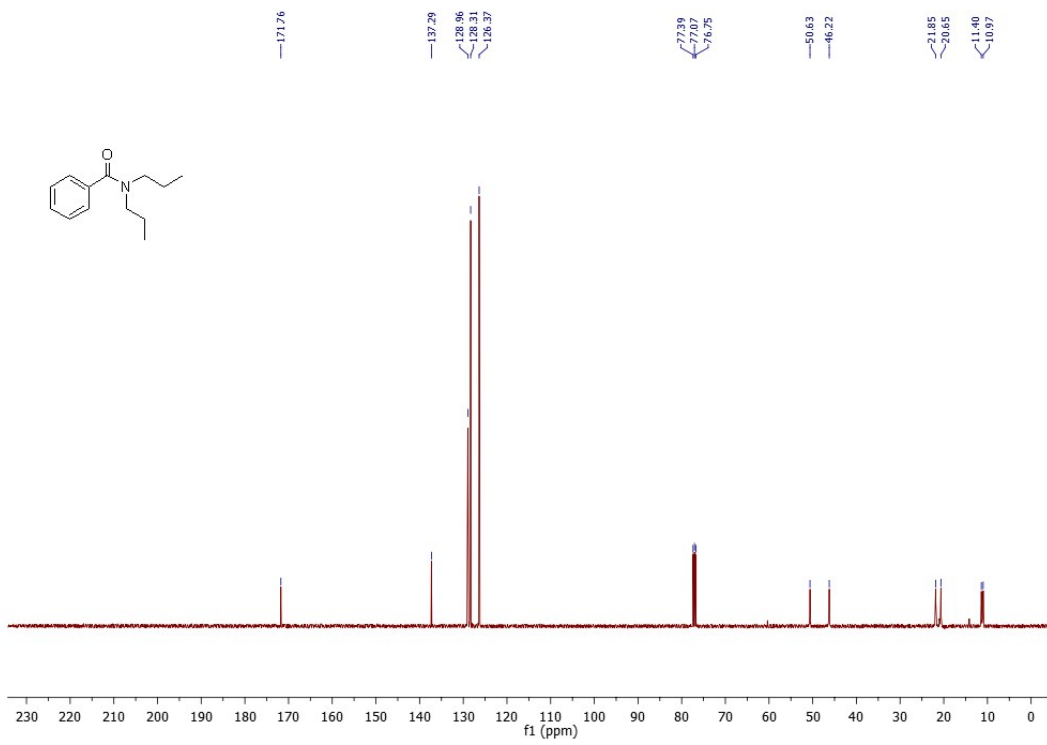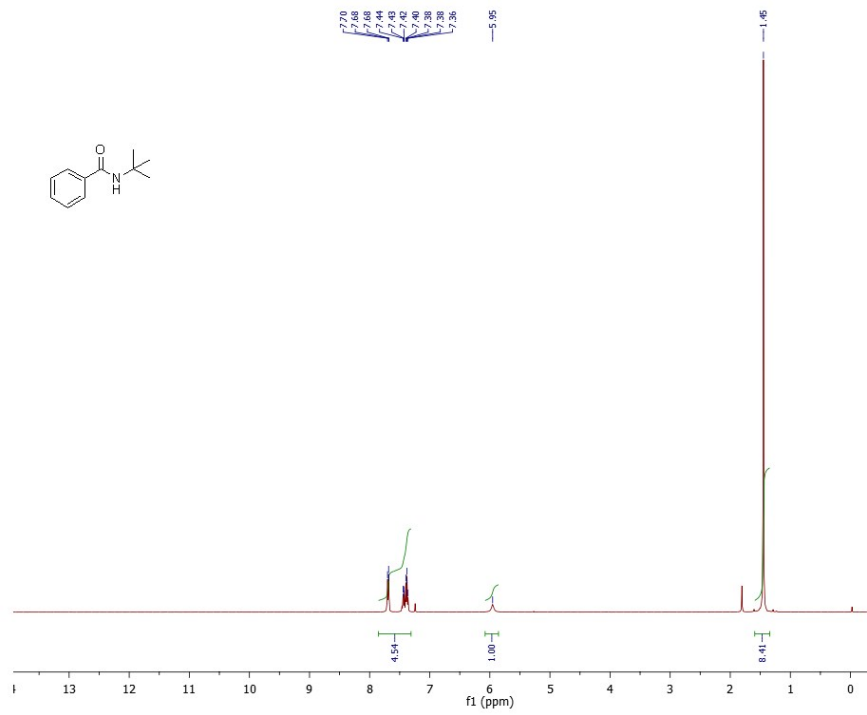



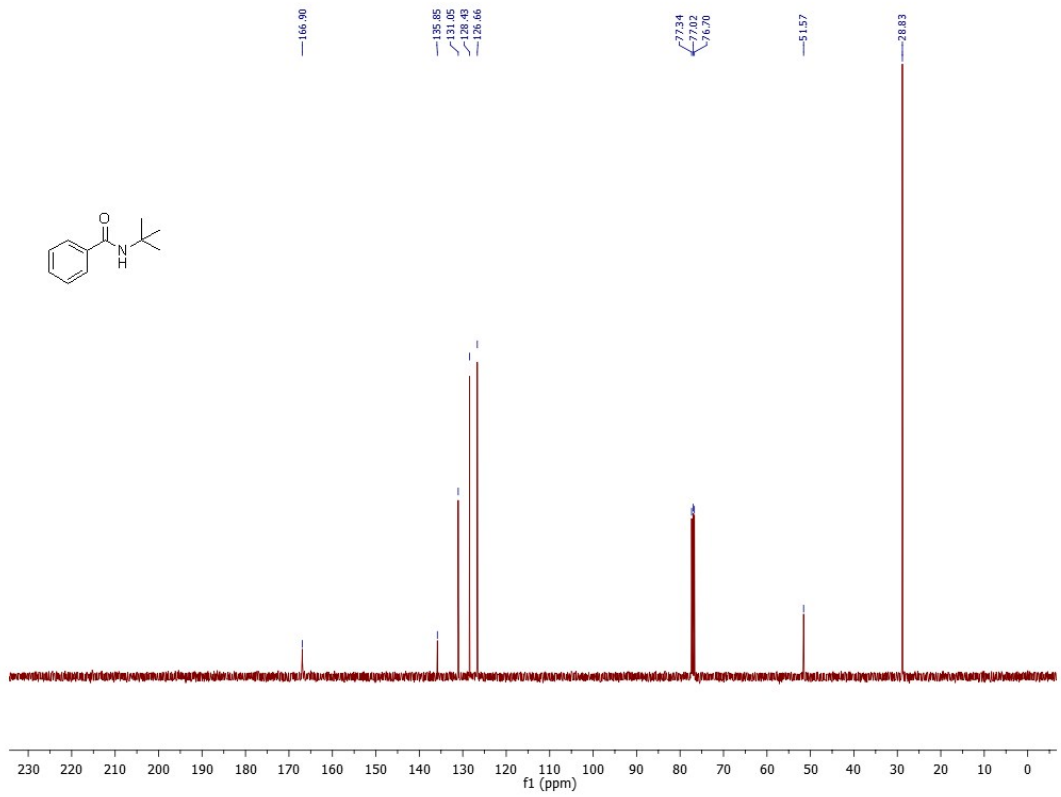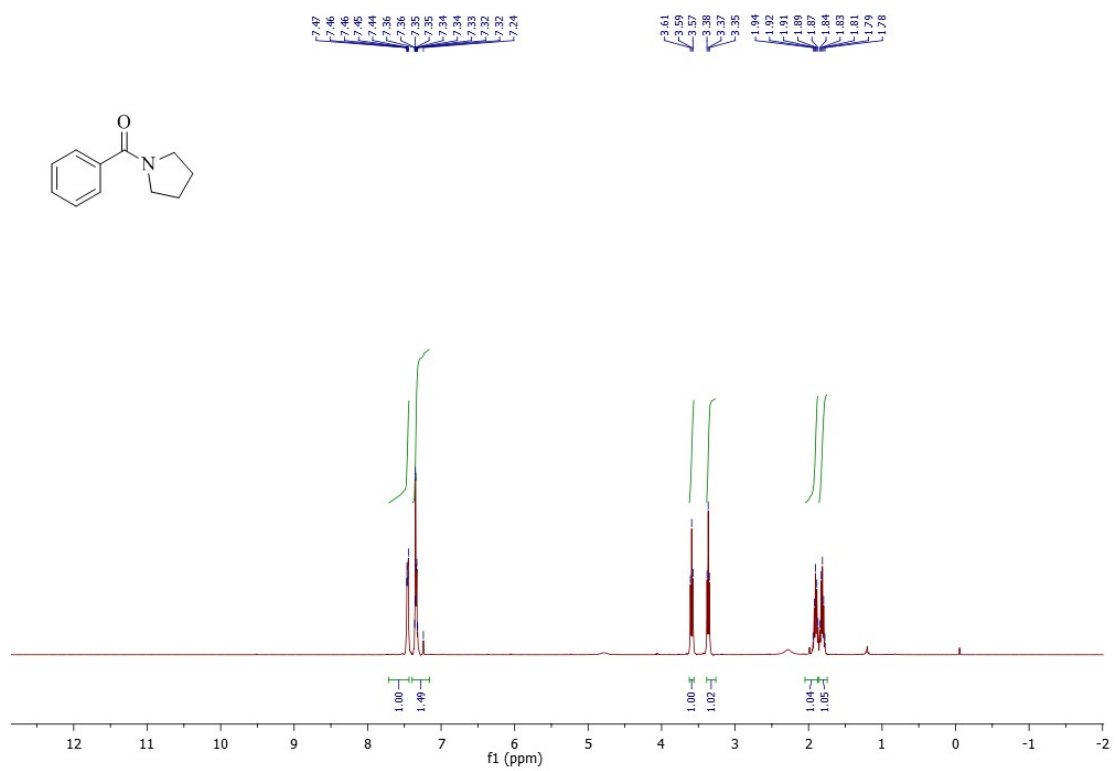

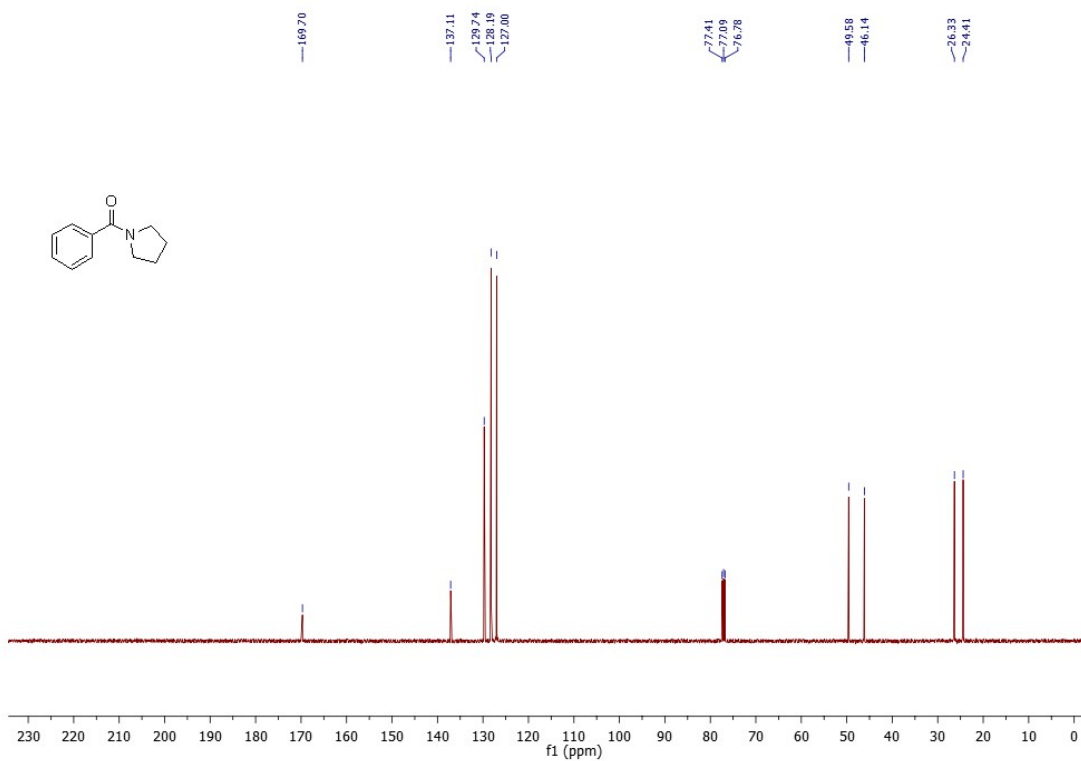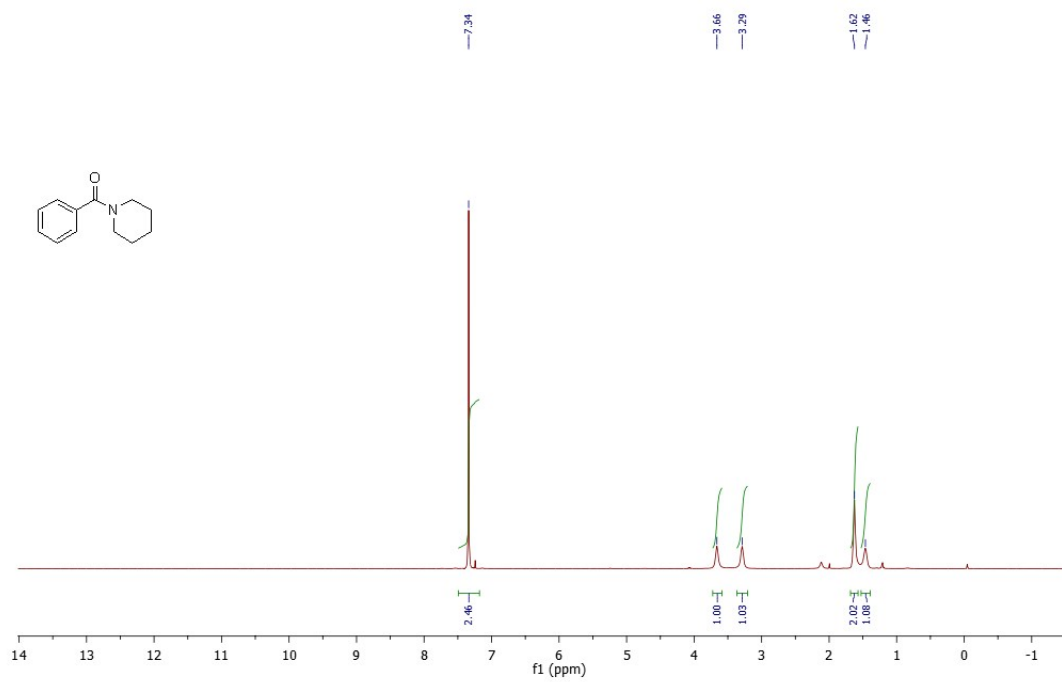

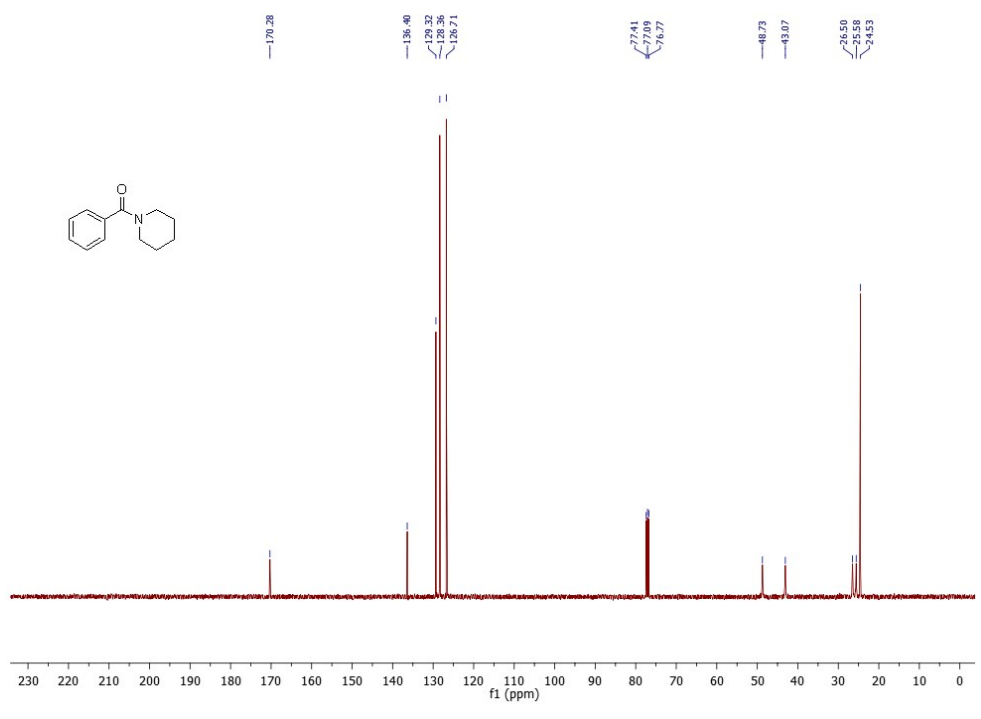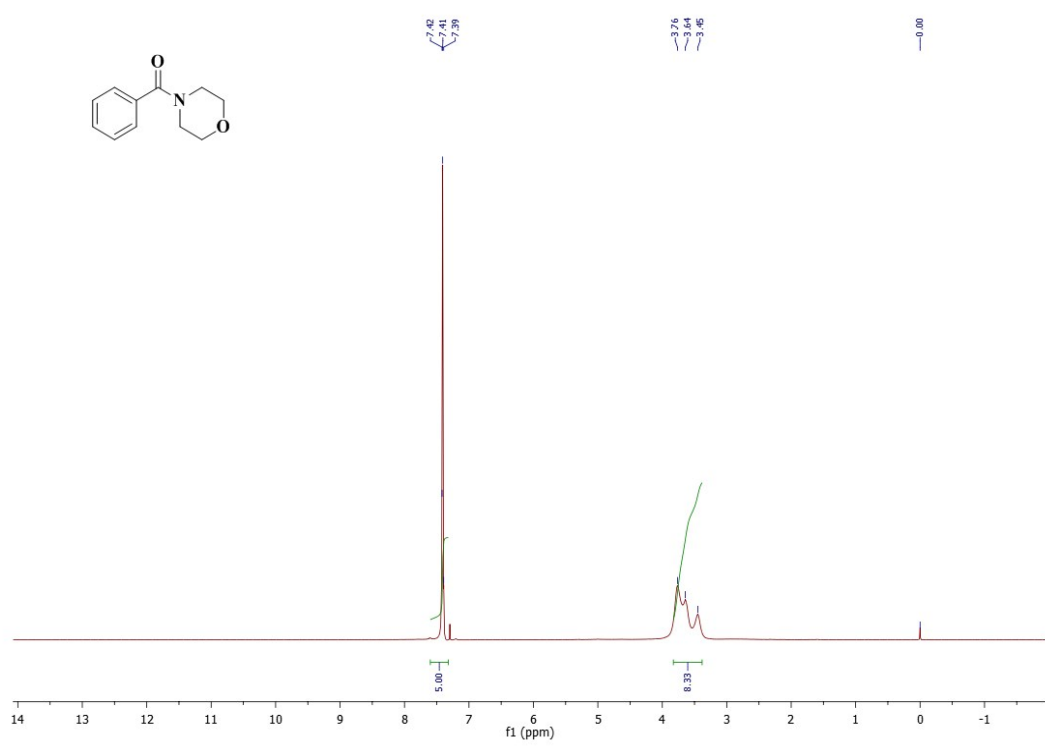

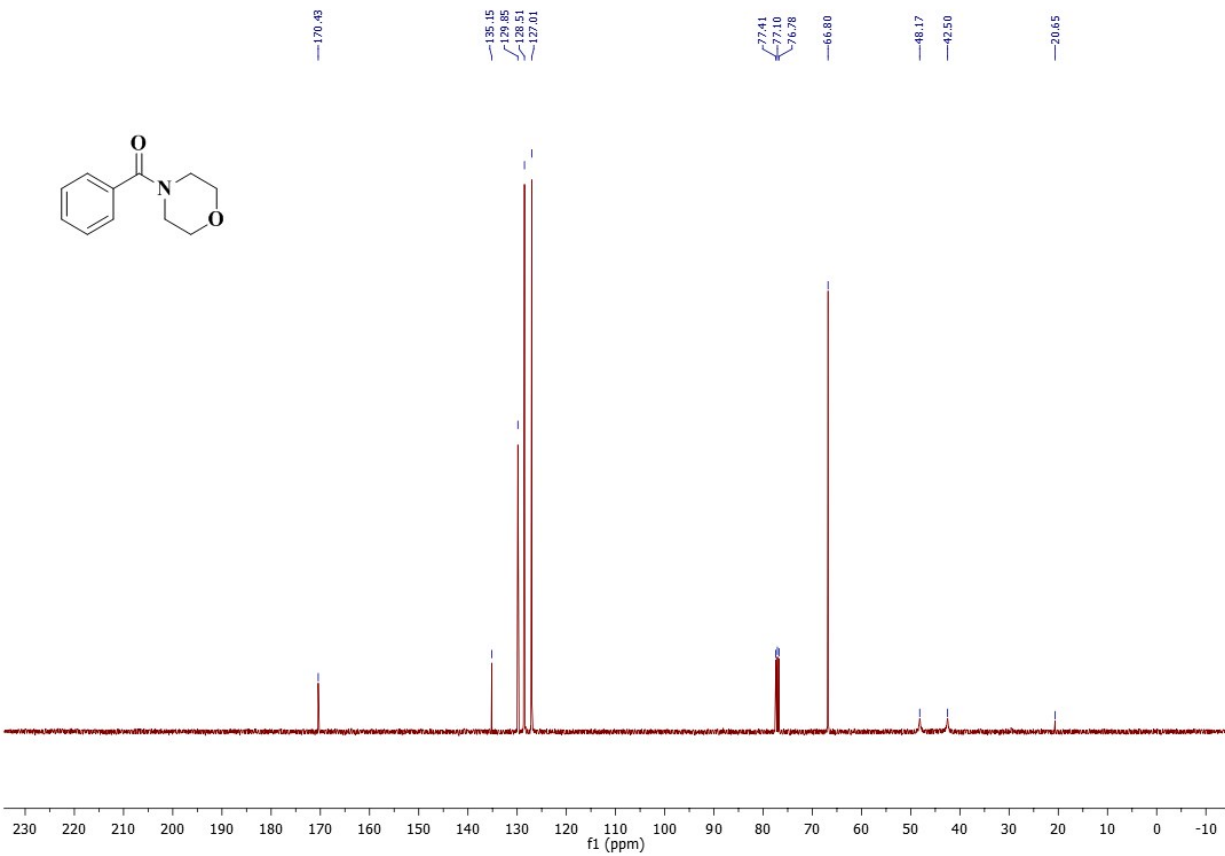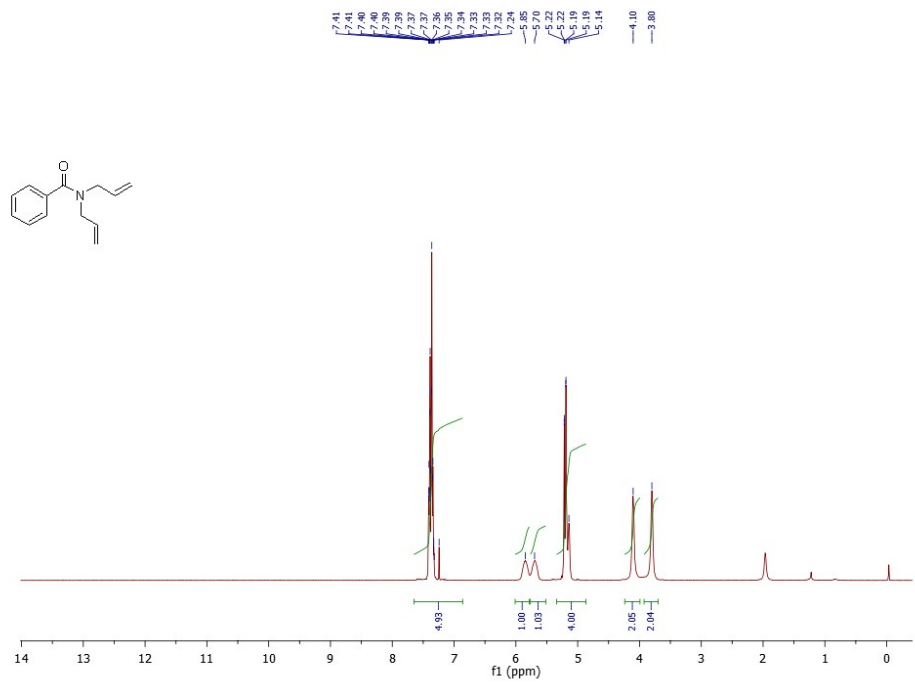

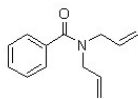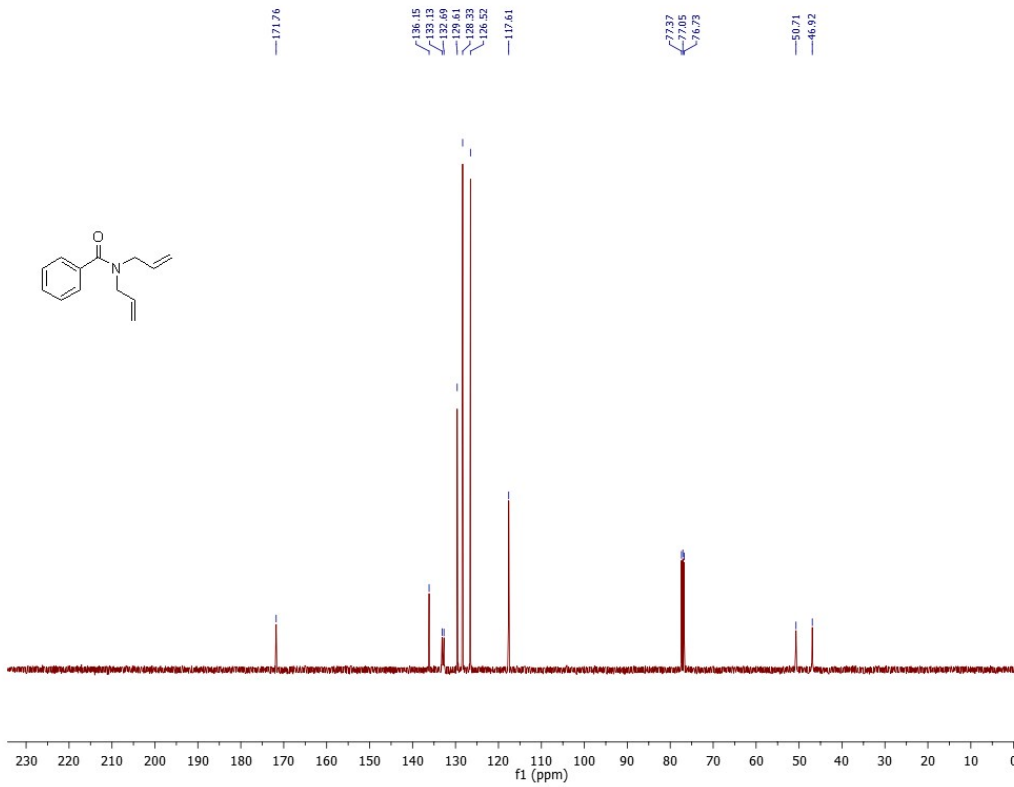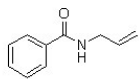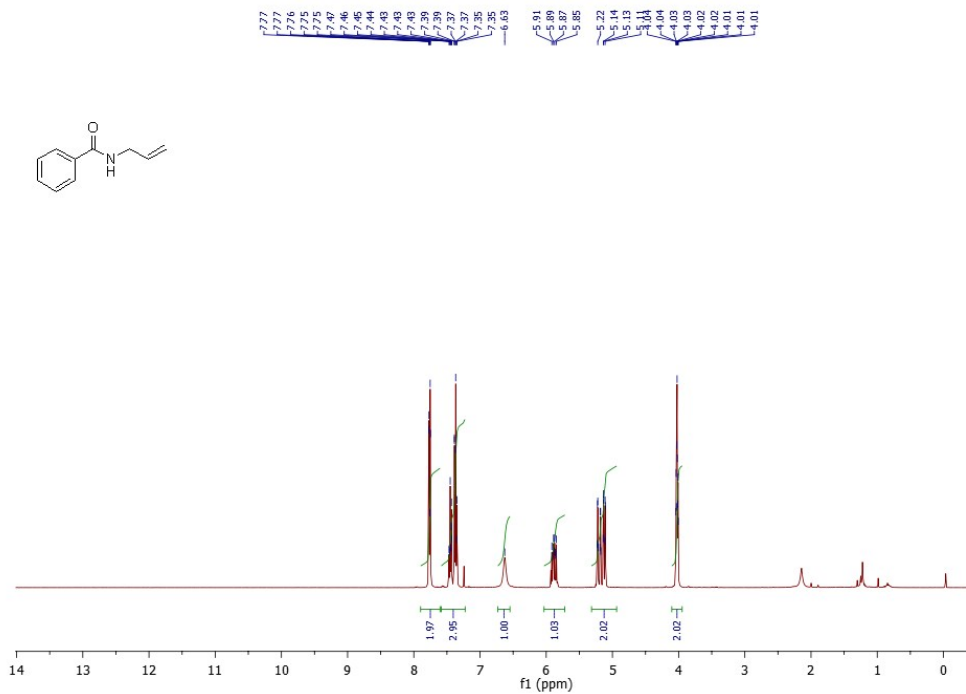

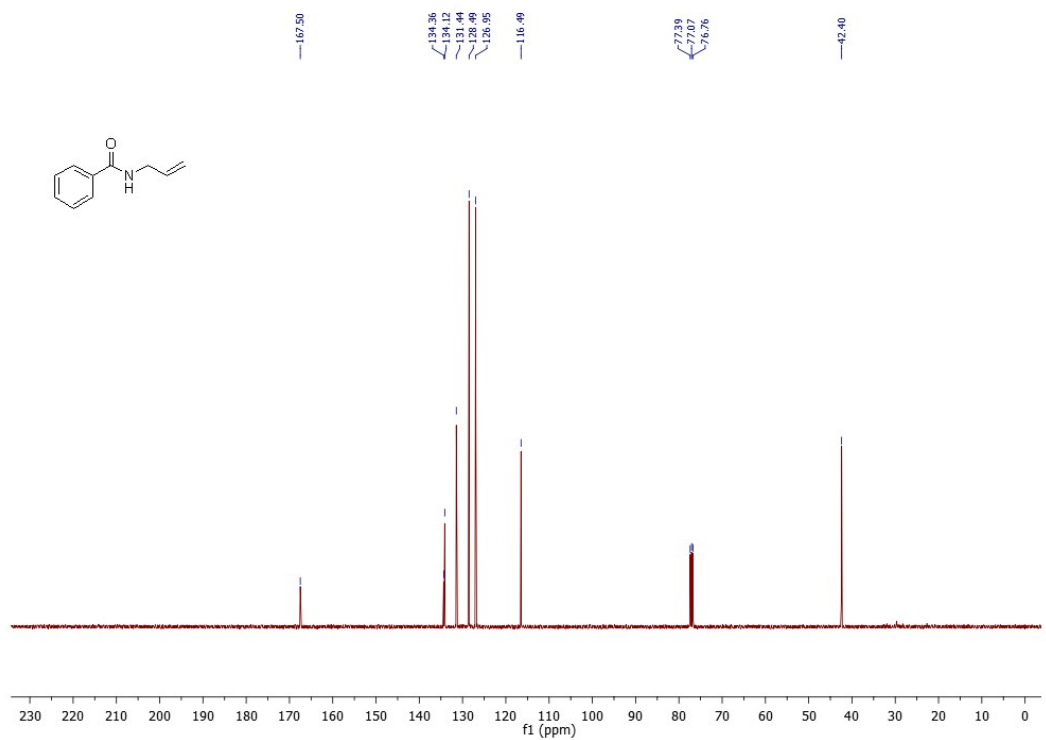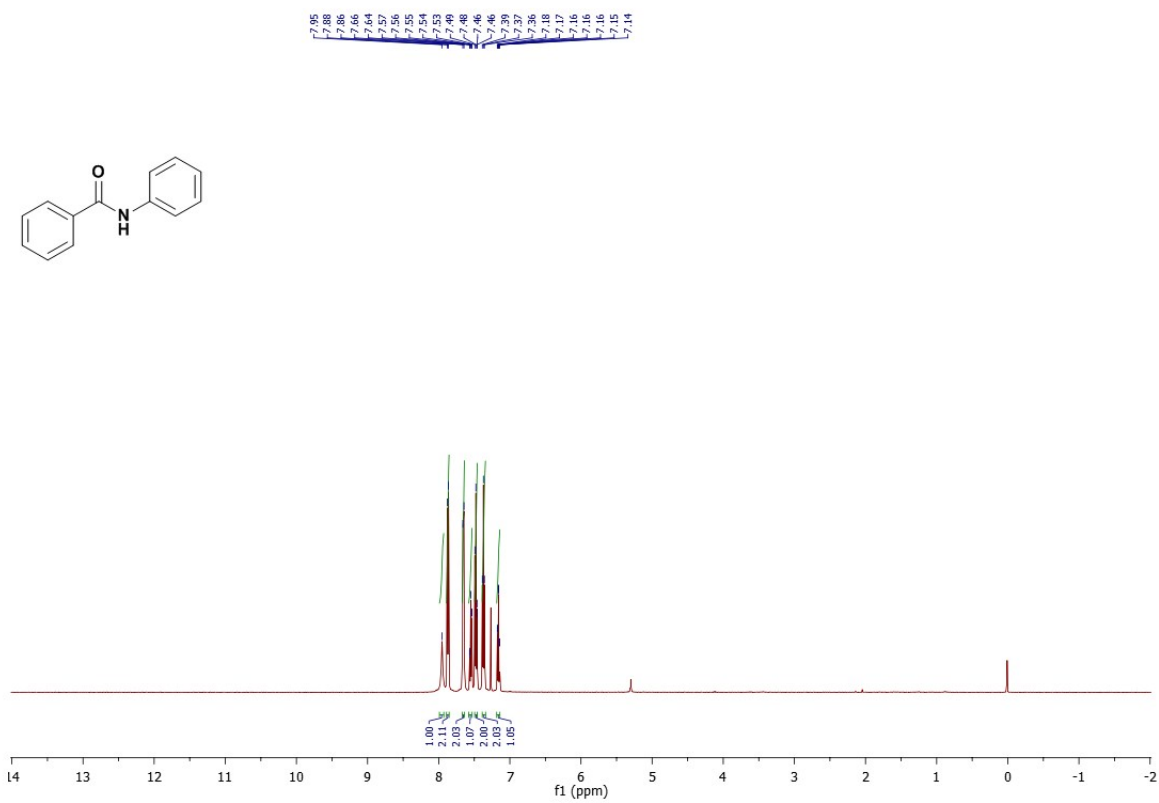

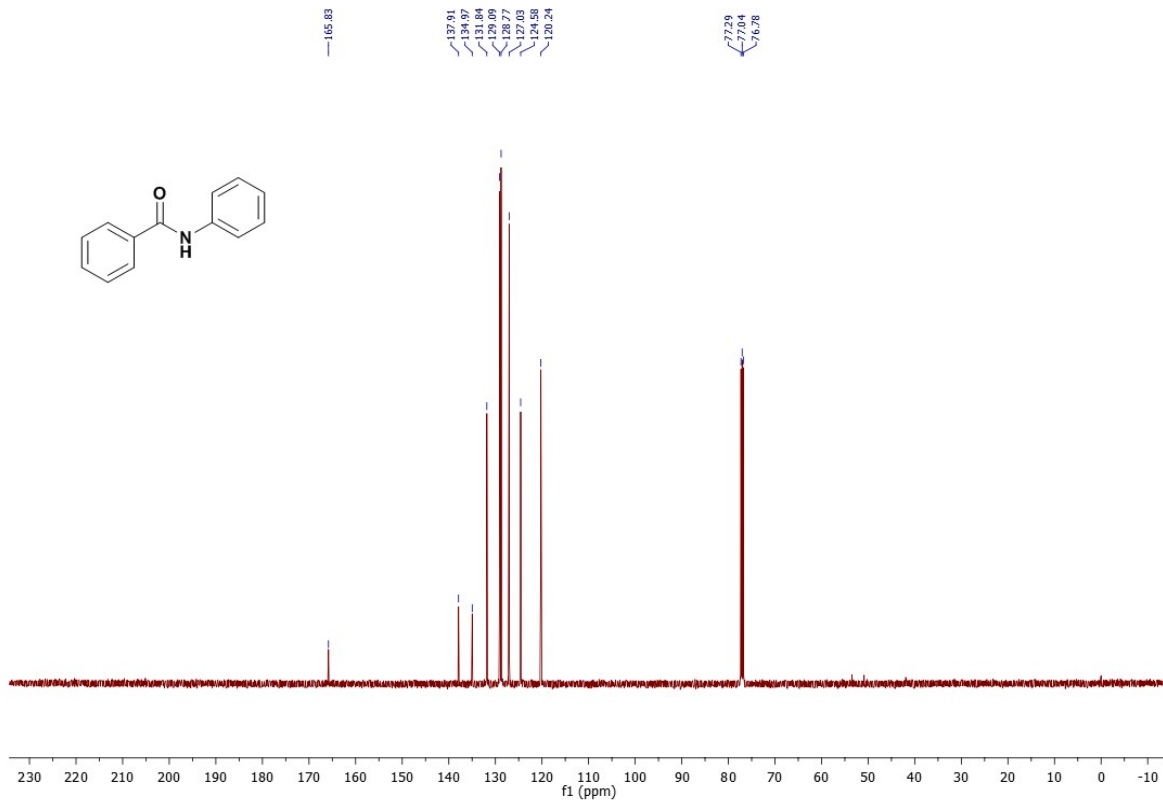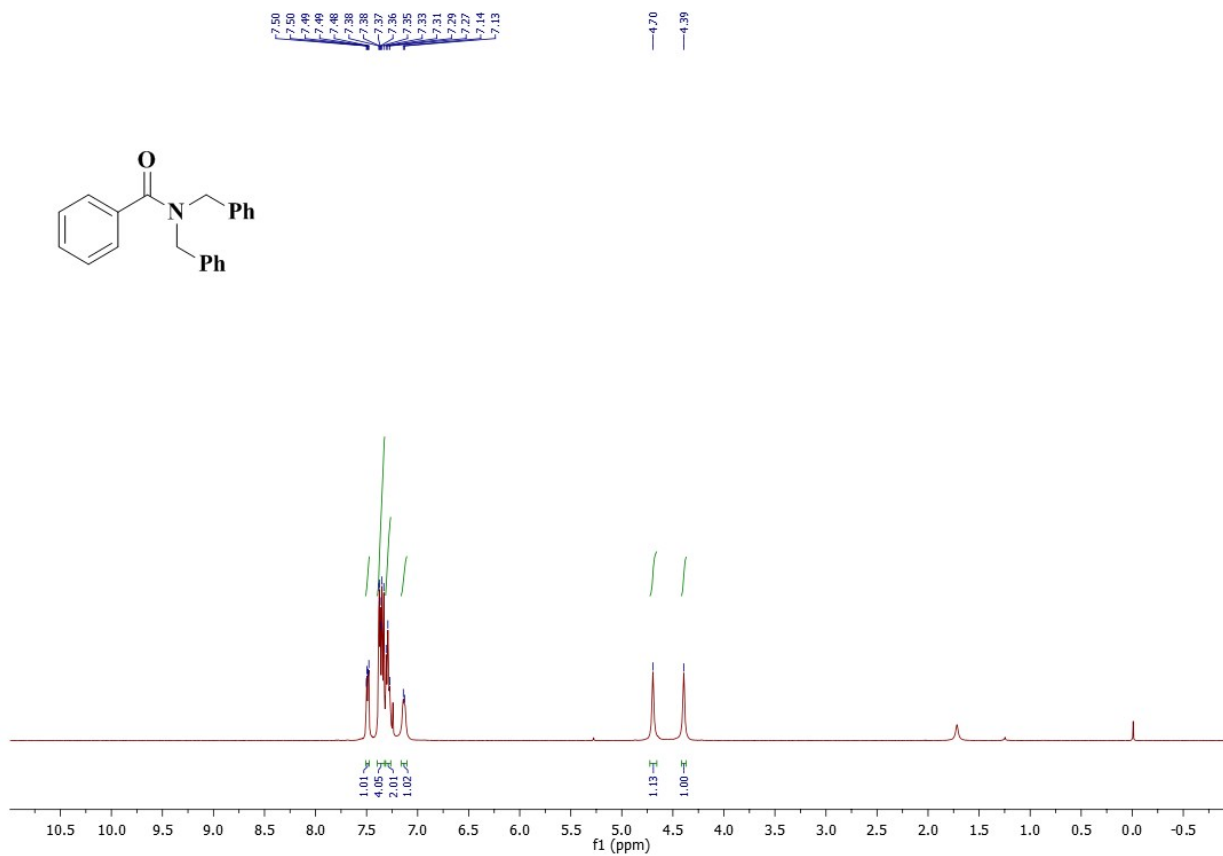

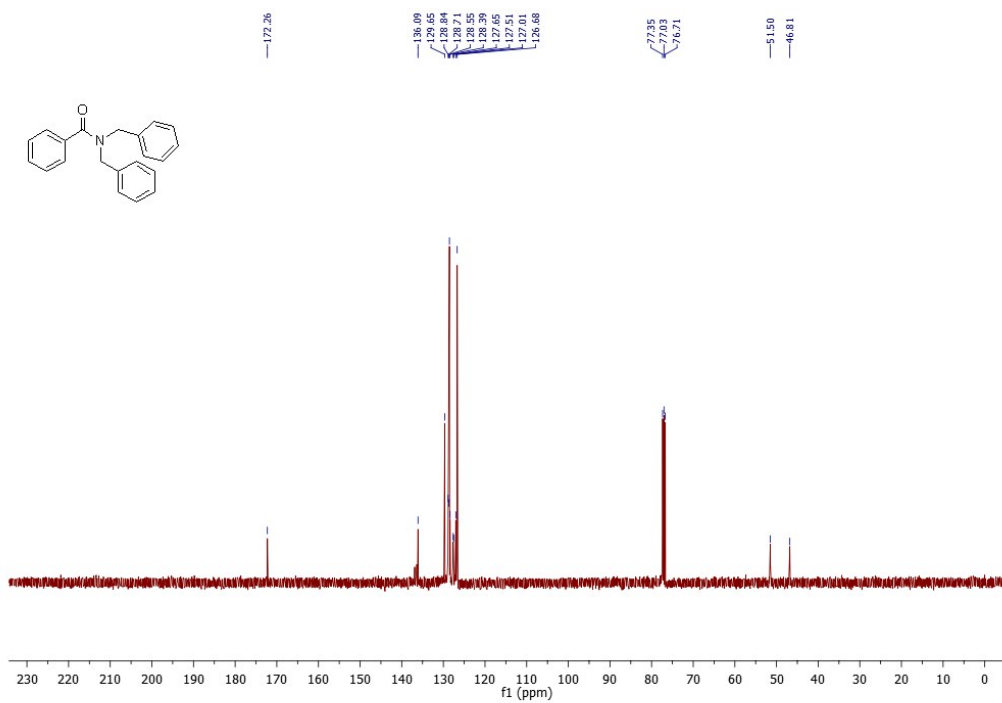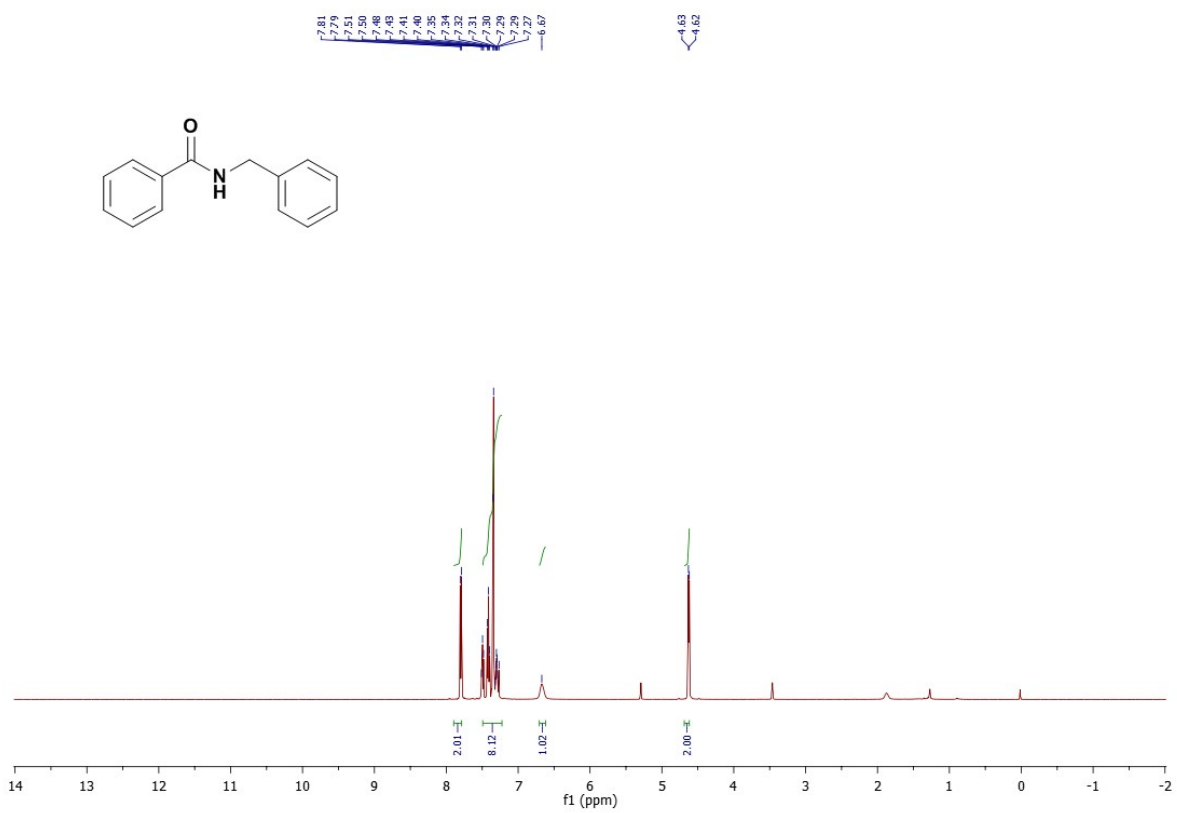



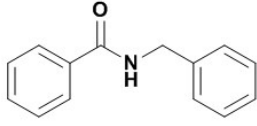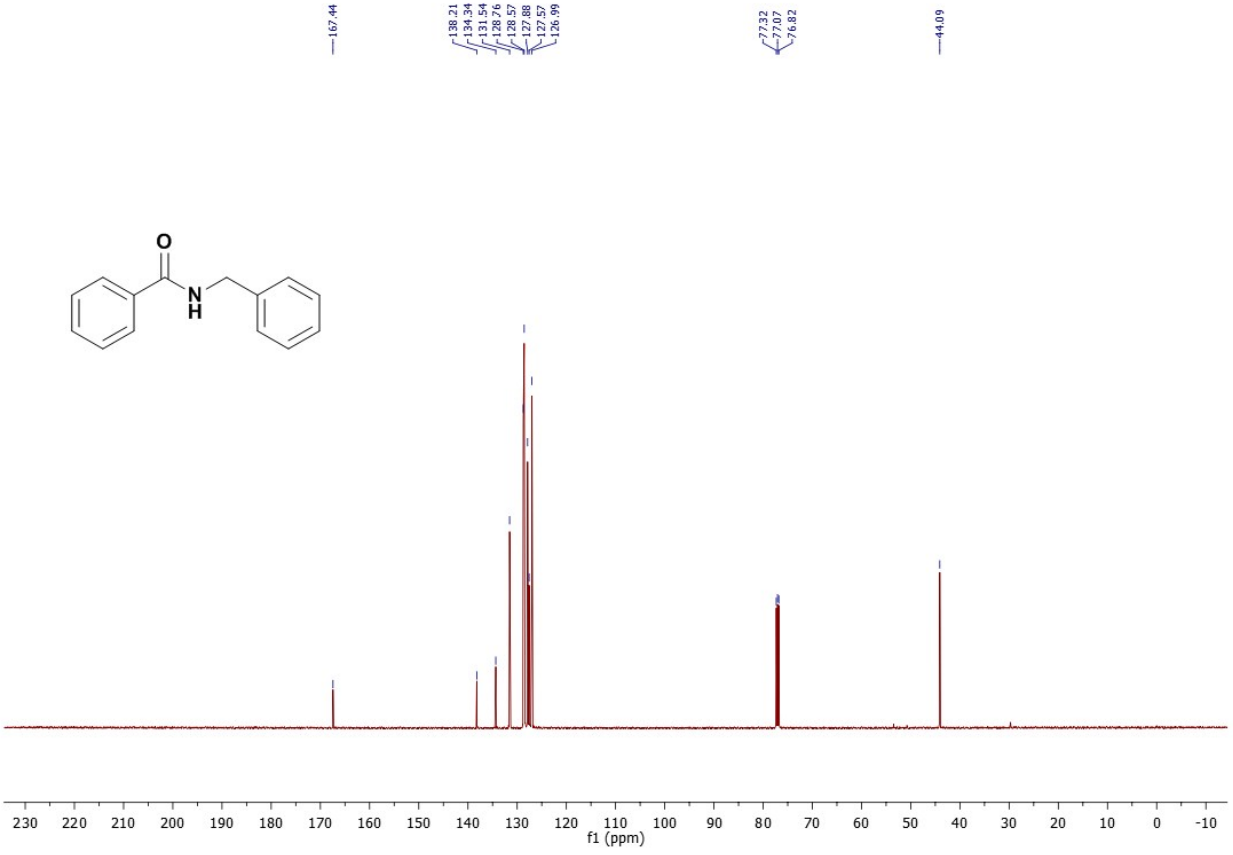

Supplement: c5ra18692g1.pdf [file c5ra18692g1.pdf]
